1 **T Lymphopoiesis from Pluripotent Stem Cells by Defined**

2 **Transcription Factors at Single Cell Resolution**

3 Rongqun Guo<sup>1,2,3,5,6,10</sup>, Fangxiao Hu<sup>1,2,5,6,10</sup>, Qitong Weng<sup>1,2,3,5,6,10</sup>, Cui Lv<sup>1,2,5,6</sup>,  
4 Hongling Wu<sup>1,2,5,6</sup>, Lijuan Liu<sup>1,2,4,5,6</sup>, Zongcheng Li<sup>7</sup>, Yang Zeng<sup>7</sup>, Zhijie Bai<sup>7</sup>, Mengyun  
5 Zhang<sup>1,2,4,5,6</sup>, Yuting Liu<sup>1,2,5,6</sup>, Xiaofei Liu<sup>1,2,4,5,6</sup>, Chengxiang Xia<sup>1,2,3,5,6</sup>, Tongjie  
6 Wang<sup>1,2,5,6</sup>, Peiqing Zhou<sup>1,2,3,5,6</sup>, Kaitao Wang<sup>1,2,4,5,6</sup>, Yong Dong<sup>1,2,5,6</sup>, Yuxuan Luo<sup>8</sup>,  
7 Xiangzhong Zhang<sup>8</sup>, Yuxian Guan<sup>1,2,5,6</sup>, Yang Geng<sup>1,2,4,5,6</sup>, Juan Du<sup>1,2,3,5,6</sup>, Yangqiu Li<sup>9</sup>,  
8 Yu Lan<sup>9</sup>, Jiekai Chen<sup>1,2,3,4,5,6</sup>, Bing Liu<sup>7\*</sup>, Jinyong Wang<sup>1,2,3,4,5,6\*</sup>

9 <sup>1</sup>CAS Key Laboratory of Regenerative Biology, Guangzhou Institutes of Biomedicine  
10 and Health, Chinese Academy of Sciences, Guangzhou, China.

11 <sup>2</sup>Guangzhou Regenerative Medicine and Health-Guangdong Laboratory (GRMH-  
12 GDL), Guangzhou, China.

13 <sup>3</sup>University of Chinese Academy of Sciences, Beijing, China.

14 <sup>4</sup>Joint School of Life Sciences, Guangzhou Institutes of Biomedicine and Health,  
15 Guangzhou Medical University, Guangzhou, China.

16 <sup>5</sup>Guangdong Provincial Key Laboratory of Stem cell and Regenerative Medicine,  
17 Guangzhou Institutes of Biomedicine and Health, Chinese Academy of Sciences,  
18 Guangzhou, China.

19 <sup>6</sup>Institute for Stem Cell and Regeneration, Chinese Academy of Sciences, Beijing,  
20 China.

21 <sup>7</sup>State Key Laboratory of Proteomics, Translational Medicine Center of Stem Cells,  
22 Fifth Medical Center, General Hospital of PLA, Beijing, China.

23 <sup>8</sup>Department of Hematology, the Third Affiliated Hospital of Sun Yat-Sen University,  
24 Guangzhou, China.

25 <sup>9</sup>Key Laboratory for Regenerative Medicine of Ministry of Education, Institute of  
26 Hematology, School of Medicine, Jinan University, Guangzhou, China.

27 <sup>10</sup>These authors contributed equally.

28 \*e-mail: [wang\\_jinyong@gibh.ac.cn](mailto:wang_jinyong@gibh.ac.cn); [bingliu17@yahoo.com](mailto:bingliu17@yahoo.com)

## 29 **ABSTRACT**

30 To date, preferentially regenerating T lymphopoiesis *in vivo* from pluripotent stem cells  
31 (PSC) remains a practical challenge. Here we documented that synergistic expression  
32 of *Runx1* and *Hoxa9* during endothelial to hematopoietic transition stage preferentially  
33 generated hematopoietic progenitors capable of homing to thymus and outputting full  
34 T lymphopoiesis in primary and secondary recipients. Single-cell transcriptome and  
35 functional analyses illustrated the cellular trajectory of T lineage induction from PSC,  
36 unveiling the T-lineage specification determined at as early as hemogenic endothelial  
37 cell stage and the *bona fide* pre-thymic progenitors with thymus-homing traits. The  
38 mature iT cells distributed normally in central and peripheral lymphoid organs and  
39 exhibited abundant TCR $\alpha\beta$  repertoire. Furthermore, the TCR-edited PSC produced  
40 functional tumor-specific-TCR-T cells *in vivo* that effectively eradicated tumor cells  
41 and transformed to memory cells. This study provides insight into preferential and  
42 complete lymphopoiesis from PSC.

43 **Key Words:** Pluripotent stem cells, transcription factors, *Runx1*, *Hoxa9*, T  
44 lymphopoiesis

## 45 INTRODUCTION

46 Engineered T cells, such as chimeric antigen receptor (CAR)-T cells (1) and tumor  
47 antigen-specific T cell receptor (TCR)-T cells (2), have been broadly applied in anti-  
48 tumor therapies (3, 4). Currently, patient blood-derived T cells are the major cell source  
49 for this type of cell therapy, the availability of which seriously depends on the  
50 conditions of individual patients and disease contexts. Regarding the unlimited source  
51 and gene-editing advantages of induced pluripotent stem cells (iPSC) (5), generating  
52 functional T cells from iPSC provides an ideal approach for broadening T cell-based  
53 translational applications.

54 A canonical method to generate T cells *in vitro* is via co-culture of hematopoietic  
55 stem/progenitors (HSPC) with stromal cell lines expressing the Notch ligand, such as  
56 OP9-DL1/DL4 or 3D-based MS5-hDLL1/4 (6-8). It has been previously shown that  
57 Notch ligands can mature mouse natural Sca1<sup>+</sup>cKit<sup>+</sup> and human natural CD34<sup>+</sup> blood  
58 progenitor cells to CD7<sup>+</sup> pre-thymic cells that can colonize thymi *in vivo* and mature  
59 into functional T cells (9, 10). However, this approach generated induced T cell  
60 progenitors from PSC lacked homing capacity *in vivo* and could only reconstitute  
61 functional T lymphopoiesis *in vivo* when pre-embedded in congenic fetal thymic lobes  
62 (11). Another prevailing concept for generating functional T lymphopoiesis from PSC  
63 is via induction of hematopoietic stem cell-like intermediates by defined factors (12-  
64 15). However, generating robust *bona fide* induced-HSC (iHSC) from PSC remains  
65 inefficient (16, 17). Accumulated developmental evidence shows that blood progenitors  
66 prior to the occurrence of definitive HSC, also possess T cell lineage differentiation

67 potential (18-20). Despite the abundant knowledge of the pivotal transcription factors  
68 regulating T cell development from HSC derivatives (21), intrinsic determinants of T  
69 cell lineage potential in the HSC-independent hematopoietic progenitors at the pre-liver  
70 and pre-thymus stages remain elusive. Thus, identifying such crucial T lineage-  
71 potential determinants might help to establish a solid protocol for efficiently  
72 reconstituting T lymphopoiesis from PSC.

73 In this study, we identified that the coordinated expression of exogenous *Runx1* and  
74 *Hoxa9* during the endothelial to hematopoietic transition stage resulted in a type of  
75 induced hemogenic endothelial cells (iHEC) resembling the developmental E11 AGM  
76 endothelial cells and pre-HSC (22). The single iHEC can be robustly educated into  
77 induced hematopoietic progenitor cells (iHPC), which gave rise to induced T cells (iT  
78 cells) with abundant TCR $\alpha\beta$  repertoire *in vivo*. The iT cells developed in thymus and  
79 distributed into central and peripheral lymphoid organs. The iT cells exhibited adaptive  
80 immune response and formed immune memory. Therapeutically, these iT cells  
81 possessed anti-tumor activities *in vivo* when engineered to carry tumor antigen-specific  
82 TCR at PSC stage. We established a novel approach of preferentially reconstituting  
83 functional and therapeutic T lymphopoiesis *in vivo* from PSC by defined transcription  
84 factors, which technically creates a link between the precision gene-edited PSC source  
85 and T cell-based immunotherapy for translational purpose.

86

87 **RESULTS**

88 **Reconstitution of T Lymphopoiesis *in vivo* from Inducible *Runx1-p2a-Hoxa9-***  
89 **Embryonic Stem Cells**

90 We hypothesized that the lymphogenic potential is determined by intrinsic determinants  
91 at putative endothelial precursor cell stage prior to and independent of HSC formation.  
92 Therefore, enforced expression of these master determinants might direct lymphoid  
93 differentiation from PSC. Since *Runx1* is pivotal for endothelial to hematopoietic  
94 transition (EHT) (23-25), definitive hematopoietic development (26-28) and T cell  
95 development (21), we started from evaluating the potential effect of *Runx1* in  
96 lymphogenic commitment from PSC. To avoid the expression variations introduced by  
97 viral delivery systems, we inserted the inducible expression cassette of *Runx1* into the  
98 *Rosa26 locus* of embryonic stem cells (*iRunx1*-ESC, C57BL/6 background) by  
99 homologous recombination (Figure S1A), which resulted in the conditional expression  
100 of exogenous *Runx1* in the presence of doxycycline (Figure S1B). We used AFT024-  
101 (mSCF/mIL3/mIL6/hFlt3L) cell line-cultured supernatants as conditioned medium  
102 (CM) for the *in vitro* induction of iHEC and subsequent iHPC, as AFT024 CM is  
103 beneficial for the generation of induced HPC *in vitro* (29). To functionally assess the T  
104 lymphopoiesis potential of iHPC, we transplanted the bulk cells containing abundant  
105 iHPC (referred as iHPC thereafter) into irradiated (2.25 Gy) B-NDG recipients (iHPC  
106 recipients) and used the occurrence of CD3<sup>+</sup> cells in peripheral blood (PB) as a positive  
107 readout of induced T lymphopoiesis *in vivo* (Figure 1A). Based on a modified protocol  
108 for HEC induction from PSC (30), we successfully generated iHEC and hematopoietic

109 progenitor derivatives (Figures S1C-S1E). However, the *iRunx1*-ESC derivatives  
110 eventually failed to generate T cells on the conditions of either *in vitro* OP9-DL1 co-  
111 culture system (Figure S1F) or *in vivo* transplantation setting (Figure S1G). We  
112 speculated that the other transcription factors essential for T lineage generation might  
113 be absent in the *iRunx1*-ESC derivatives. To identify these absent factors, we sorted the  
114 single iHEC from *iRunx1*-ESC and performed single-cell RNA-Seq. In comparison  
115 with E11 T1-pre-HSC, we identified eight hematopoietic-essential transcription factors,  
116 *Hoxa5* (13), *Hoxa7* (31), *Hoxa9* (32), *Hoxa10* (33), *Hlf* (34), *Ikzf1* (35), *Nkx2-3* (36),  
117 and *Setbp1* (37), which were barely expressed in *iRunx1*-ES-derived iHEC but  
118 abundantly expressed in E11 T1-pre-HSC (Figure 1B). Consistent with the previous  
119 reports that human PSC-derived HEC lacks expression of HOXA family (13, 38). We  
120 further used an “*iRunx1+Xi*” tandem-factor-knock-in strategy to perform unbiased  
121 screening of the potential combinatory effects of these factors with Runx1 in lymphoid  
122 lineage induction. Following the same induction protocol, we identified that the  
123 inducible expression of exogenous *Runx1* and *Hoxa9* from day 6 to day 11 during the  
124 induction program led to the production of robust iHEC phenotypically resembling  
125 embryonic pre-HSC (CD31<sup>+</sup>CD41<sup>low</sup>CD45<sup>c-kit</sup>CD201<sup>high</sup>) (Figure 1C) (22). Notably,  
126 CD201<sup>+/high</sup> expression can enrich hemogenic precursors with both definitive HPC and  
127 HSC potential from as early as E9.5 embryos (39). After co-culture of these iHEC with  
128 OP9-DL1 feeder line (GFP<sup>+</sup>) in the presence of CM and doxycycline (1 µg/ml), robust  
129 iHPC occurred at day 21, including phenotypic pre-thymic progenitors (Lin<sup>c-</sup>  
130 kit<sup>+</sup>CD127<sup>+</sup>/CD135<sup>+</sup>) (21) (Figure 1D), and CD11b<sup>+</sup>/Gr1<sup>+</sup> myeloid cells, but no CD3<sup>+</sup>

131 T cells (Figure S1H). To further assess the engraftment potential of these iHPC, we  
132 transplanted 0.5-1 million *iR9*-ESC-derived iHPC (day-21) into irradiated (2.25 Gy) B-  
133 NDG mice (8-week-old, CD45.1 strain) in the absence of doxycycline. Four weeks after  
134 transplantation, we observed donor-derived CD45.2<sup>+</sup> CD3<sup>+</sup> T cells, but no  
135 CD45.2<sup>+</sup>CD19<sup>+</sup> B cells and no CD45.2<sup>+</sup>CD11b<sup>+</sup> myeloid cells, in the PB of B-NDG  
136 mice transplanted with the iHPC (Figure 1E). Five independent experiments indicated  
137 that the *iR9*-ESC-derived iHPC gave rise to CD3<sup>+</sup> iT cells in over 80% B-NDG  
138 recipients (iT-B-NDG mice, 32/40) (Figures 1F and S1I). In addition, the day-17 iHPC  
139 also reconstituted T lymphopoiesis in B-NDG recipients (Figures S2A-2D). Thus, we  
140 established a novel approach of preferentially generating iT cells from gene-edited PSC  
141 by defined transcription factor *Runx1* and *Hoxa9*.

## 142 **The iT Cells Show Features of Multi-organ Distributions and Abundant TCR** 143 **Diversity**

144 We further analyzed the tissue distributions and immunophenotypes of the regenerated  
145 T lymphocytes in iT-B-NDG mice. Mature CD4SP and CD8SP iT cells were detected  
146 in the spleen, lymph node and PB of iT-B-NDG mice, the majority of which were TCR $\beta$   
147 positive (Figure 2A). In addition,  $\gamma\delta$  iT cells were also detected in gut and lung tissues  
148 of iT-B-NDG mice (Figure S3A). Induced NK cells (iNK, CD45.2<sup>+</sup>NK1.1<sup>+</sup>CD3<sup>-</sup>) were  
149 also detected in the spleen and bone marrow of iT-B-NDG mice (Figure S3B). The  
150 thymus of iT-B-NDG mice also contained induced CD4SP (iCD4SP), induced double  
151 positive (iDP, CD45.2<sup>+</sup>CD4<sup>+</sup>CD8<sup>+</sup>), induced CD8SP (iCD8SP), and induced double  
152 negative (iDN, CD45.2<sup>+</sup>Lin<sup>-</sup>CD4<sup>-</sup>CD8<sup>-</sup>) cells when examined at week-4 and week-5

153 after transplantation of iHPC. Interestingly, the majority of the iDN cells were at iDN1  
154 (CD45.2<sup>+</sup>Lin<sup>-</sup>CD4<sup>-</sup>CD8<sup>-</sup>CD44<sup>+</sup>CD25<sup>-</sup>) phase at week-4, and at iDN2 (CD45.2<sup>+</sup>Lin<sup>-</sup>  
155 CD4<sup>-</sup>CD8<sup>-</sup>CD44<sup>+</sup>CD25<sup>+</sup>)/iDN3 (CD45.2<sup>+</sup>Lin<sup>-</sup>CD4<sup>-</sup>CD8<sup>-</sup>CD44<sup>-</sup>CD25<sup>+</sup>) phases at week-  
156 5 (Figure 2B). Besides the iT cells and induced NK1.1<sup>+</sup>CD3<sup>-</sup> NK (iNK) cells detected  
157 in bone marrow, we also observed *iR9*-ES-derived Lin<sup>-</sup>Sca1<sup>+</sup>cKit<sup>+</sup> (iLSK) progenitor  
158 cells (Figure 2C). To assess whether the iLSK cells can contribute to T lymphopoiesis,  
159 we sorted this population from primary iHPC recipients (week-6) and performed  
160 secondary transplantation. Six weeks after transplantation, iT cells appeared in PB, BM,  
161 and SP of the B-NDG recipients (Figure 2D). Of note, despite *iR9*-ES-derived myeloid  
162 lineage cells were barely detected *in vivo*, the iLSK cells indeed gave rise to very limited  
163 myeloid colonies in CFU assay (data not shown). To further characterize the iT cells at  
164 transcriptome level, we sorted 1,000 cell aliquots of the CD4SP iT cells and CD8SP iT  
165 cells from the spleens of iT-B-NDG mice for RNA-Seq analysis. Our data indicated  
166 that the CD4SP iT cells resembled natural CD4SP T cells, and the CD8SP iT cells  
167 resembled natural CD8SP T cells, both of which expressed surface marker-encoding  
168 genes *Cd2*, *Fas*, *Cd3e*, *Cxcr3*, *Cd28*, *Cd27*, *Cd7*, *Cd5*, and *Il7r* (Figure 2E). Of note,  
169 the CD4SP iT cells, but not CD8SP iT cells, expressed the *ThPOK* (T helper inducing  
170 POK factor, also known as *Zbtb7b*), a master regulator in regulating CD4 vs. CD8 T  
171 cell lineage commitment (40). In addition, the iT cells also expressed T cell identity  
172 genes and key regulators *Tcf7* (41), *Tox* (42), *Lck* (43), *Gata3* (44), *Bcl11b* (45), *Ikzf2*  
173 (46), and *Rora* (47) (Figure 2F). In comparison with natural T cell counterparts, the iT  
174 cells also showed features of discrepantly expressed genes (a difference in expression



175 of over two-fold; adjusted P value < 0.05 (DESeq2 R package)) (Supplementary file 1),  
176 including weaker expression of *Tcf7*. Genomic PCR sequencing using primer pairs  
177 flanking the *Runx1-p2a-Hoxa9* element further confirmed that the reconstituted iT cells  
178 *in vivo* were of *iR9*-PSC origin, which carried the inserted *Runx1-p2a-Hoxa9* (Figure  
179 S3C). To further assess the diversities of the TCR $\alpha\beta$  clonotypes of the iT cells, we  
180 performed TCR deep sequencing using the sorted naïve CD4SP  
181 (CD45.2<sup>+</sup>CD4<sup>+</sup>CD62L<sup>+</sup>CD44<sup>-</sup>) and CD8SP iT cells (CD45.2<sup>+</sup>CD8<sup>+</sup>CD62L<sup>+</sup>CD44<sup>-</sup>)  
182 from the spleens and thymi of iT-B-NDG mice at week-6 after transplantation of iHPC.  
183 The aliquots of 15,000 sorted naïve CD4SP and CD8SP iT cells were used as cell inputs  
184 for TCR $\alpha\beta$  sequencing at the transcription level. TCR $\alpha\beta$  clonotype profiling using  
185 MiXCR (48) captured abundant diversities of TCR $\alpha\beta$  sequences among the sorted naïve  
186 iT cells isolated from the thymi (Figures 2G and 2H) and spleens (Figures 2I and 2J) of  
187 the iT-B-NDG mice. Collectively, these data indicate that the *iR9*-ESC-derived iHPC  
188 reconstitute T lymphopoiesis *in vivo* resembling natural T cell development.

### 189 **Single iHEC Efficiently Give Rise to iT Cells both *in vitro* and *in vivo***

190 To further investigate the efficiency of iHEC differentiating into iT cells, we sorted  
191 single iHEC into individual wells (24 well-plates) pre-seeded with OP9-DL1 feeder  
192 cells (Figure 3A). After ten-day co-culture, over 15 percent individual iHEC formed  
193 blood colonies (76/384 wells) (Figure 3B), which contained abundant pre-thymic  
194 progenitors (Lin<sup>-</sup>c-kit<sup>+</sup>CD127<sup>+</sup>/CD135<sup>+</sup>) (Figure S4). After co-culture with OP9-DL1  
195 feeder line in the presence of hFlt3L, hIL7 and doxycycline (1  $\mu$ g/ml), these iHEC-  
196 formed blood colonies (30/30) further differentiated into CD3<sup>+</sup> iT cells *in vitro* (Figure

197 3B), including a major population of TCR $\gamma\delta$  iT cells, and a small proportion of CD8<sup>+</sup>  
198 TCR $\beta$  iT cells (Figure 3C). To assess the T lymphopoiesis potential of these single-  
199 iHEC-derived iHPC, we further collected the iHPC from each colony at day 21 and  
200 transplanted them into individual B-NDG mice. Four weeks after transplantation,  
201 CD11b<sup>-</sup>CD19<sup>-</sup>CD3<sup>+</sup> iT cells were detected in approximately 28% (7/25) B-NDG mice  
202 transplanted with the cell derivatives from individual iHEC-formed clones (Figures 3B  
203 and 3D). Collectively, the *iR9*-ESC-derived iHEC robustly gave rise to T cells at the  
204 single cell level.

#### 205 **Cellular trajectory from iHEC and iHPC**

206 To characterize the single iHEC at transcriptome level, we performed single-cell RNA-  
207 Seq using the sorted iHEC and compared them with natural single E11 endothelial cells  
208 (EC), Type-I pre-HSC, Type-II pre-HSC, E12 HSC, E14 HSC, and adult HSC described  
209 previously (22). Principle component analysis indicated that the iHEC localized  
210 between embryonic EC and pre-HSC (Figures 4A and 4B). A large proportion of iHEC  
211 expressed artery or vein-related genes, suggestive of their EC-like nature (Figure 4C).  
212 Most iHEC expressed endothelial surface marker-encoding genes *Cdh5* (coding VE-  
213 Cadherin, 70/70) and *Esam* (57/70), which were continuously expressed from  
214 embryonic EC to pre-HSC at a relatively high level. On the other hand, partial iHEC  
215 expressed *Procr* (coding CD201, 32/70), *Cd47* (33/70) and *Cd63* (44/70), which were  
216 upregulated from EC to pre-HSC (Figure 4D). The expression of transcription factors  
217 related to endothelial and hematopoietic development further revealed that the iHEC  
218 shared a similar feature with embryonic EC and pre-HSC. Majority of the iHEC

219 expressed *Fli1* (66/70), *Erg* (42/70), *Lmo2* (49/70), *Mycn* (65/70), and *Sox7* (38/70).  
220 Specifically, a small proportion of iHEC expressed *Bcl11a* (11/70) and *Hoxb5* (24/70).  
221 All these transcription factors are pivotal for lymphoid lineage development (Figure  
222 4E). Thus, the molecular features of the iHEC show similarities with embryonic EC  
223 and pre-HSC.

224 To further characterize the iHPC during the hematopoietic maturation process, we  
225 sorted the single iHPC from day-14, day-17, day-21 cell products derived from *iR9*-ES  
226 and performed single-cell RNA-Seq. To visualize the time course data of iHPC, we  
227 performed t-distributed stochastic neighbor embedding (tSNE, the genes with  
228 expression value TPM >1 in more than 30 samples were selected) analysis and  
229 illustrated that the day-14-iHPC formed a unique population distinct from day-11-iHEC  
230 and the major population of day-17 iHPC. However, the day-17 iHPC and day-21 iHPC  
231 already merged (Figure 4F). In addition, the day-21 iHPC formed a new subpopulation  
232 labeled with relatively abundant *Gata2* expression (Figure S5A). The endothelia-  
233 related transcription factors, such as *Sox7* and *Sox18*, were abundantly expressed in  
234 day-11 iHEC, however, were immediately silenced in day-14 iHPC (Figure 4G). The  
235 *Ets1* gene, involving embryonic endothelial and lymphoid development (49), was shut  
236 down in day-14 iHPC but turned on again in day-17 iHPC (Figure 4G). The  
237 transcription factors involving hematopoietic development, such as *Lyl1* (50), *Etv6* (51),  
238 *Prdm5* (14), *Myb* (52), *Sfp1* (53-55), and *Meis1* (56), were widely expressed among  
239 day-14, 17, and 21 iHPC populations. (Figure 4H). Further, the transcription factors  
240 related to lymphoid development, including *Lmo2* (57), *Bcl11a* (58), *Ikzf1* (59), *Myc*

241 (21, 60), *Gata3* (61), and *Tcf7* (41), were also expressed in iHPC (Figures 4I and S5B).  
242 Of note, day-17 and day-21 iHPC showed abundant expression of *Tcf7* (Figure 4I).  
243 Given the thymus-homing problem of the PSC-derived HPC reported by others (11),  
244 we observed that the day-21-iHPC derived from *iR9*-ES abundantly expressed surface  
245 marker-encoding gene *Kit* (21), *Flt3* (21), *Cd7* (9, 10), *Ccr9* (62, 63), and *Cxcr4* (64,  
246 65), which is a feature of natural pre-thymic progenitors possessing thymus-homing  
247 ability (Figure 4I). Collectively, the *iR9*-ES-derived iHPC show hematopoietic or  
248 lymphopoietic features at transcriptome level and the day-21 iHPC contain robust pre-  
249 thymic progenitor-like cells.

#### 250 **The iT Cells Reject Allogeneic Skin and Form Memory Response *in vivo***

251 To investigate the function of iT cells derived from *iR9*-ESC (C57BL/6 background)  
252 *in vivo*, we transferred the iT cells (5 million equivalents of iT cells per *Rag1*<sup>-/-</sup>)  
253 isolated from iT-B-NDG spleen into *Rag1*<sup>-/-</sup> mice (iT-*Rag1*<sup>-/-</sup> mice). Four days after the  
254 adoptive iT cell transfer, we transplanted allogeneic skin from BALB/c mice into the  
255 iT-*Rag1*<sup>-/-</sup> mice. The allogeneic skin grafts were rapidly rejected by iT-*Rag1*<sup>-/-</sup> mice at  
256 around day 9 after transplantation, as indicated by bulged, ulcerative and necrotic  
257 lesions at the graft sites (Figure 5A). Besides the mature iT cells (CD4SP, CD8SP) in  
258 the PB of iT-*Rag1*<sup>-/-</sup> mice (Figure 5B), activated CD4SP and CD8SP iT cells  
259 (CD44<sup>high</sup>CD69<sup>+</sup>) were also detected in the rejected allogeneic skin tissues (Figure 5C).  
260 The iT-*Rag1*<sup>-/-</sup> mice still showed the existence of iT cells in PB thirty days after the  
261 primary allogeneic rejection, and again rejected the secondary allogeneic skin grafts  
262 (Figure S6). Flow cytometry indicated that IL17<sup>+</sup> and IFN $\gamma$ <sup>+</sup> CD4<sup>+</sup> iT cells, and IFN $\gamma$ <sup>+</sup>

263 CD8<sup>+</sup> iT cells existed in the primary- and secondary-rejected skin grafts (Figure 5D).  
264 Collectively, these results indicated that the adoptively transferred iT cells in *Rag1*<sup>-/-</sup>  
265 mice mediated rejection of allogeneic skin grafts and sustained immunological  
266 memory, suggestive of a typical adaptive immune response.

### 267 **The iT Cells Derived from TCR-edited iPSC eradicate tumor cells *in vivo***

268 Regarding the advantages of unlimited cell source and gene-editing advantage of iPSC,  
269 we introduced tumor antigen-specific TCR (MHC-I restricted OVA TCR, OT1) into  
270 *iR9*-iPSC and further assessed the anti-tumor activity of the derived OT1 iT cells. We  
271 reprogrammed mouse MEF (C57BL/6 background, CD45.2 strain) into iPSC using  
272 retro-viruses carrying *Oct4/Klf4/Sox2*. Two cassettes of *rtTA-TRE-Runx1-p2a-Hoxa9-*  
273 *HygroR* and *CAG-OT1-TCR-IRES-GFP-PuroR* were inserted into the loci of *Rosa26*  
274 and *Hipp11* of iPSC (*OT1-iR9*-iPSC), respectively (Figure 6A). Intracellular staining  
275 indicated that the OT1-TCR were expressed in the *OT1-iR9*-iPSC (Figure 6B). The  
276 *OT1-iR9*-iPSC were further induced into OT1-iHEC (Figure 6C) and OT1-iHPC  
277 (Figure 6D). We transplanted the OT1-iHPC (three million per mouse) into irradiated  
278 (4.5 Gy) *Rag1*<sup>-/-</sup> mice (OT1-iHPC recipients) to reconstitute OT1-iT lymphopoiesis.  
279 Six weeks after transplantation, the OT1-iHPC recipients showed GFP<sup>+</sup>CD8<sup>+</sup> iT cells  
280 expressing OT1 TCR $\alpha\beta$  in PB (Figure 6E). We then engrafted E.G7-OVA tumor cells  
281 into the groin of the *Rag1*<sup>-/-</sup> or OT1-iT reconstituted *Rag1*<sup>-/-</sup> mice (OT1-iT-*Rag1*<sup>-/-</sup> mice)  
282 by subcutaneous injection (0.2 million/mouse). Tumor growth kinetics demonstrated  
283 that the E.G7-OVA tumors were dramatically inhibited in the OT1-iT-*Rag1*<sup>-/-</sup> mice in  
284 comparison with the control *Rag1*<sup>-/-</sup> mice (Figure 6F). We sacrificed the OT1-iT-*Rag1*<sup>-/-</sup>

285 <sup>-/-</sup> mice for the distribution analysis of the iT cells in tumors and lymphoid organs 19  
286 days after the tumor cell transplantation. Flow cytometry analysis demonstrated that the  
287 E.G7-OVA tumors in the OT1-iT-*Rag1*<sup>-/-</sup> mice were infiltrated with CD8<sup>+</sup> OT1-iT cells,  
288 which contained effector (CD44<sup>+</sup> CD62L<sup>-</sup>) and memory (CD44<sup>+</sup> CD62L<sup>+</sup>) iT cells, and  
289 IFN $\gamma$ -secreting iT cells (Figure 6G). We also observed abundant CD8<sup>+</sup> iT cells carrying  
290 OT1 TCR $\alpha\beta$  in the bone marrow, lymph node, and spleen of these mice (Figure S7).  
291 Collectively, these data indicate that the iT cells derived from TCR-engineered iPSC  
292 show anti-tumor activity in a solid tumor model.

## 293 **DISCUSSION**

294 In this study, the iHEC from *iR9*-PSC gave rise to blood progenitor cells preferentially  
295 differentiating into iT cells *in vivo*. It is possible that the combinatory expression of  
296 *Runx1* and *Hoxa9*, pivotal transcription factors for definitive hematopoietic (26-28, 66)  
297 and T cell development (21), synergistically and preferentially orchestrates the T and  
298 NK lineage potentials but intrinsically compromises the other blood lineage potentials  
299 during the early EHT and subsequent hematopoietic maturation phases in our induction  
300 protocol. Regarding the developmental evidence that an earlier wave of hematopoietic  
301 preceding HSC emergence also produces blood progenitors possessing the T cell  
302 lineage potential (18-20), it is also possible that the *iR9*-PSC-derived iHPC resemble  
303 the developmental HPC prior to the occurrence of definitive HSC since overexpression  
304 of *Runx1* and *Hoxa9* at definitive HSC phase promoted myeloid-instead of lymphoid-  
305 biased hematopoietic *in vivo* (Figure S8). The hematopoietic maturation step in the  
306 presence of OP9-DL1 feeder line unlikely causes T-lineage-biased iHPC, as an

307 inducible expression of another transcription factor cocktails in PSC exactly using the  
308 same protocol giving rise to iHPC preferentially contributing to B lymphopoiesis in B-  
309 NDG recipients (unpublished data). Nonetheless, our data support the concept that  
310 synergies of distinct transcription factors intrinsically determine variable hematopoietic  
311 lineage potentials at as early as hemogenic endothelial cell phase.

312 Intravenous infusion of the iHPC from *iR9*-PSC successfully reconstituted iT  
313 lymphopoiesis *in vivo*. The induced LSK cells from the primary iHPC recipients further  
314 gave rise to T lymphocytes in secondary recipients. The occurrences of iDN1, iDN2,  
315 iDN3, iDN4 cells at different time-points in the thymi of iT-B-NDG mice strongly  
316 indicated that the induced pre-thymic progenitors ( $\text{Lin}^{\text{c}}\text{-kit}^{\text{+}}\text{CD127}^{\text{+}}/\text{CD135}^{\text{+}}$ ) have the  
317 capacities of homing to central lymphoid organs and developed normally following a  
318 cellular trajectory resembling natural T cell development. Besides the pivotal roles of  
319 exogenous *Runx1* and *Hoxa9* during EHT and subsequent iHPC maturation phases, we  
320 could not exclude the possibilities that the weak leaky expression of these two factors  
321 further facilitated the iT cell development *in vivo* after infusion into immune-deficient  
322 mice, as *Runx1* and *Hoxa9* are also involved in T cell development in bone marrow (67)  
323 and thymus (21). In contrast to our approach, an induced T cell progenitor population  
324 (DN2/DN3 cell phase) from mouse ESC lacked thymus-homing capacity *in vivo* and  
325 required congenic fetal thymus organ for further development into mature T cells (11),  
326 which implicated that an intrinsic gene network program essential for physiological T  
327 cell development were not fully activated during hematopoietic induction from PSC,  
328 which can be rescued by exogenous expression of *Runx1* and *Hoxa9*. Nonetheless, our

329 approach fully reconstitutes functional T lymphopoiesis *in vivo* using PSC source,  
330 which avoids the malfunction risks of *in vitro* generated T cells due to the insufficiency  
331 of negative and positive selections.

332 The single iHEC exhibited a transcriptome signature resembling E11 AGM EC and  
333 pre-HSC. Activating the signature genes lacking in the iHEC but abundant in natural  
334 E11 AGM EC or pre-HSC might further promote the production of a homogenous  
335 iHEC population, thus consequently resulting in more efficient T cell generation or  
336 multi-lineage hematopoietic. The feature of T cell-lineage-bias commitment from *iR9*-  
337 PSC brings advantages for gene editing using *iR9*-PSC rather than using canonical adult  
338 HSPC, since manipulating HSPC *in vitro* always faces stemness loss and might even  
339 introduce unknown impacts on the functions of other blood lineage derivatives from  
340 the edited HSPC.

341 In conclusion, this study establishes a novel approach of preferentially reconstituting  
342 functional and therapeutic T lymphopoiesis *in vivo* using PSC source by defined  
343 transcription factors. At single cell resolution, we unveil that the T-lineage specification  
344 is determined at as early as hemogenic endothelial cell stage and identify the *bona fide*  
345 pre-thymic progenitors with thymus-homing features. This study provides insight into  
346 therapeutic T cell generation *in vivo* using PSC source, which is promising for PSC-  
347 based universal and personalized immunotherapy.

#### 348 **ACKNOWLEDGEMENTS**

349 This work is supported by the Strategic Priority Research Program of Chinese Academy  
350 of Sciences (XDA16010208), the Major Research and Development Project of



351 Guangzhou Regenerative Medicine and Health Guangdong Laboratory  
352 (2018GZR110104006), the CAS Key Research Program of Frontier Sciences  
353 (QYZDB-SSW-SMC057), the Chinese Ministry of Science and Technology  
354 (2015CB964401, 2016YFA0100601, 2017YFA0103401, 2015CB964902, and  
355 2015CB964901), the Health and Medical Care Collaborative Innovation Program of  
356 Guangzhou Scientific and Technology (201803040017), the Major Scientific and  
357 Technological Project of Guangdong Province (2014B020225005), the Science and  
358 Technology Planning Project of Guangdong Province (2017B030314056), the Program  
359 for Guangdong Introducing Innovative and Entrepreneurial Teams (2017ZT07S347),  
360 the National Natural Science Foundation of China (314711117, 81470281, 31600948,  
361 31425012).

#### 362 **AUTHOR CONTRIBUTIONS**

363 R.G. and F.H. conducted all the major experiments, data analysis and wrote the  
364 manuscript. Q.W., C.Lv, H.W., L.L., Y.Z., Z.B., M.Z., Y.L., X.L., C.X., T.W., P.Z., K.W.,  
365 Y.D., Y.L., YX.G. and Y.G. participated in multiple experiments; Q.W. and Z.L.  
366 performed RNA-Seq and data analysis. C.Lv, H.W., Y.L., P.Z., Y.L., X.Z. and J.C.  
367 constructed vectors, prepared iPSC, designed and participated gene editing. Y.L. and  
368 YQ.L. discussed the single cell data; B.L. and J.W. discussed the data and wrote the  
369 manuscript; and J.W. designed the project and provided the final approval of the  
370 manuscript.

#### 371 **DECLARATION OF INTERESTS**

372 The authors declare no competing interests.

373

## 374 MATERIALS AND METHODS

### 375 MICE

376 B-NDG (NOD-*Prkdc*<sup>Scid</sup>*IL2rg*<sup>tm1</sup>/Bcgen, CD45.1<sup>+</sup>) mice were purchased from  
377 Biocytogen Jiangsu Co., Ltd (Jiangsu, China). BALB/c and C57BL/6 (CD45.2<sup>+</sup>) mice  
378 were purchased from Beijing Vital River Laboratory Animal Technology. *Rag1*<sup>-/-</sup> mice  
379 (C57BL/6 background) were a gift from Dr. Z. Liu from Institute of Biophysics (CAS,  
380 China). Mice were housed in the SPF-grade animal facility of the Guangzhou Institutes  
381 of Biomedicine and Health, Chinese Academy of Sciences (GIBH, CAS, China). All  
382 animal experiments were approved by the Institutional Animal Care and Use  
383 Committee of Guangzhou Institutes of Biomedicine and Health (IACUC-GIBH).

### 384 CELL CULTURE

385 Mouse embryonic fibroblasts (MEFs) were derived from 13.5 d.p.c C57BL/6 mouse  
386 embryos. MEFs were maintained in DMEM/high glucose (Hyclone), 10% FBS  
387 (Natocor) supplemented with 1% nonessential amino acids (NEAA, Gibco). C57BL/6  
388 mouse embryonic stem cells (Biocytogen) were maintained on feeder layers in ES  
389 medium containing DMEM/high glucose, 15% FBS (Gibco), 1% NEAA, 1%  
390 GlutaMAX (Gibco), 1% Sodium Pyruvate (Gibco), 0.1 mM  $\beta$ -mercaptoethanol (Gibco),  
391 1  $\mu$ M PD0325901 (Selleck), 3  $\mu$ M Chir99021 (Selleck) and 1000 U/ml LIF. The OP9-  
392 DL1 cells (GFP<sup>+</sup>) were maintained in  $\alpha$ -MEM (Gibco) supplemented with 20% FBS  
393 (CellMax). The AFT024 cell lines (ATCC) were maintained in DMEM/high glucose,  
394 10% FBS (Natocor) supplemented with 0.1 mM  $\beta$ -mercaptoethanol and 1% Sodium

395 Pyruvate. HEK293T (ATCC) and Plat-E (Cell Biolabs, Inc) cells were maintained in  
396 DMEM/high glucose supplemented with 10% FBS (Natocor). Ka539 B cell lymphoma  
397 cell line (C57BL/6 background) was a gift from Chong Chen lab (Sichuan University).  
398 Ka539 cells transfected with a virus expressing luciferase reporter were cultured in  
399 DMEM/high glucose and IMDM (Gibco) supplemented with 10% FBS (Natocor), 0.1  
400 mM  $\beta$ -mercaptoethanol. E.G7-OVA cell line (ATCC) was cultured in RPMI 1640  
401 (Gibco) supplemented with 10% FBS (Natocor), 1% GlutaMAX, 1% sodium pyruvate,  
402 and 0.1 mM  $\beta$ -mercaptoethanol.

#### 403 **HEMATOPOIETIC DIFFERENTIATION**

404 PSC were trypsinized by 0.05% Trypsin-EDTA (Gibco) and resuspended in the basic  
405 differentiation medium (BDM: IMDM, 15% FBS (Gibco), 200 $\mu$ g/ml iron-saturated  
406 transferrin (Sigma), 0.45 mM monothioglycerol (Sigma), 1% GlutaMAX, and 50  
407  $\mu$ g/ml ascorbic acid (Sigma)). For removing the feeder layers, the PSC were plated into  
408 the 0.1% gelatin-coated (Merck Millipore) well, and the floating cells were collected  
409 after 40 min. For EB generation (68), the PSC were resuspended at 100,000 cells/ml in  
410 the BDM supplemented with 5 ng/ml BMP4 (Peprotech) and plated at 20  $\mu$ l/drop for  
411 inverted culture in 15 cm dishes. At day 2.5, EBs were replanted into gelatinized plates  
412 in BDM supplemented with 5 ng/ml BMP4 and 5 ng/ml VEGF (Peprotech). At day 6,  
413 the medium was changed to BDM supplemented with 2% conditioned medium derived  
414 from the supernatants of AFT024-mIL3, AFT024-mIL6, AFT024-hFlt3L and AFT024-  
415 mSCF cell culture. Doxycycline (1  $\mu$ g/ml, Sigma) was added at day 6. The medium was  
416 replaced every other day. The plates were seeded with OP9-DL1 cells (20000 cells/well,

417 12-well plate) 12 hours prior to the hematopoietic maturation step in EM medium ( $\alpha$ -  
418 MEM, 15% DFBS (Hyclone), 200  $\mu$ g/ml iron-saturated transferrin, 0.45 mM  
419 monothioglycerol, 1% GlutaMAX, 50  $\mu$ g/ml ascorbic acid, 2% conditioned medium  
420 derived from supernatants of AFT024-mIL3, AFT024-hFlt3L and AFT024-mSCF cell  
421 culture and 1  $\mu$ g/ml doxycycline. 100-500 sorted iHEC were seeded into each well for  
422 hematopoietic maturation. The EM was half-replaced every two days.

### 423 **TRANSPLANTION OF iHPC**

424 8-10-week-old B-NDG mice were sublethally irradiated (2.25 Gy) by an X-ray  
425 irradiator (RS2000, Rad Source Inc.). 0.5-1 million PSC-derived iHPC were injected  
426 into each irradiated B-NDG mouse via retro-orbital veins. The mice were fed with water  
427 containing co-trimoxazole (Tianjin Lisheng Pharmaceutical co., LTD) for two weeks to  
428 prevent infection.

### 429 **T LYMPHOCYTE INDUCTION *IN VITRO***

430 For T lymphocyte induction *in vitro*, OP9-DL1 coculture method(6) was used with  
431 minor modifications. Briefly, the single-cell suspensions of iHPC (Day 21) were  
432 maintained on OP9-DL1 feeder cells in T cell induction medium (TIM,  $\alpha$ -MEM, 20%  
433 DFBS, and 1% GlutaMAX) supplemented with 2% conditioned medium derived from  
434 supernatants of AFT024-hFlt3L and AFT024-hIL7 cell culture for sustained 12 days.  
435 The iHEC-derived cells were trypsinized into single-cell suspensions and replanted into  
436 fresh OP9-DL1 monolayers every 6 days. And the TIM was replaced every 3 days.

### 437 **GENE EDITING**

438 Mouse MEF cells were reprogrammed into iPSC as described (69). The *CAG Pr-rtTA*-

439  $3\times Stop-TRE-Runx1-p2a-Hoxa9-pA-PGK Pr-HygroR$  cassette was inserted into the  
440 *Rosa26 locus* of mouse ESC/iPSC. The positive clones (*iR9-ESC/iPSC*) were selected  
441 by Hygromycin B (150  $\mu$ g/ml, Invivogen) were further cultured in ES medium  
442 supplemented with Dox (1  $\mu$ g/ml). The induced expression of *Runx1* and *Hoxa9* was  
443 confirmed by qPCR. For the generation of *OT1-iR9-iPSC*, a *CAG Pr-OT1 TCR $\alpha$ -p2a-*  
444 *TCR $\beta$ -IRES-GFP-PGK Pr-PuroR* cassette was inserted into the *Hipp11 locus* of *iR9-*  
445 *iPSC*. The *OT1* sequence was cloned from murine TCR OT1-2A.pMIG II (Addgene).  
446 The *OT1-iR9-iPSC* positive clones were further selected by Puromycin (1  $\mu$ g/ml,  
447 Invivogen) and the expression of OT1-TCR were measured by intra-cellular staining.

#### 448 **FLOW CYTOMETRY AND CELL SORTING**

449 Single-cell suspensions were prepared by 0.05% Trypsin-EDTA and filtered by 70  $\mu$ m  
450 filter. Single cells were blocked by Fc (CD16/32) (93, eBioscience) antibody, and then  
451 stained with related antibodies. The following antibodies were used: c-kit (2B8,  
452 eBioscience), CD31 (390, eBioscience), CD41 (eBioMWR30, eBioscience), CD45  
453 (30-F11, eBioscience), CD45.1 (A20, eBioscience), CD45.2 (104, eBioscience), CD2  
454 (RM2-5, eBioscience), CD3 (145-2C11, eBioscience), CD4 (GK1.5, eBioscience),  
455 CD8a (53-6.7, eBioscience), CD19(eBio1D3, eBioscience), B220 (RA3-6B2,  
456 eBioscience), CD11b (M1/70, eBioscience), NK1.1 (PK136, eBioscience), Ter119  
457 (TER-119, eBioscience), Gr1 (RB6-8C5, eBioscience), CD201 (eBio1560,  
458 eBioscience), CD135 (A2F10, eBioscience), CD127 (A7R34 eBioscience) Fc $\epsilon$ RI $\alpha$   
459 (MAR-1, biolegend), CD69 (H1.2F3, biolegend), CD62L (MEL-14, biolegend) IFN $\gamma$   
460 (XMG1.2, biolegend), IL17 (TC11-18H10.1, biolegend), CD44 (IM7, eBioscience),

461 CD25 (PC61.5, eBioscience), TCR $\beta$  (H57-597, eBioscience), TCR $\gamma\delta$  (GL3,  
462 eBioscience), TCR $\nu\alpha 2$  (B20.1, biolegend), TCR $\nu\beta 5.1/5.2$  (MR9-4, biolegend)  
463 Streptavidin PE-Cy7 (eBioscience), Streptavidin eFlour 450 (eBioscience),  
464 Streptavidin PE-Cy5 (biolegend). The cells were resuspended in the DAPI solution, or  
465 PI solution (eBioscience) and were analyzed with Fortessa cytometer (BD Biosciences).  
466 The cells were sorted using Arial II cytometer (BD Biosciences). The flow data were  
467 analyzed with FlowJo (Three Star, Ashland OR).

#### 468 **ALLOGENEIC SKIN TRANSPLANTION**

469 Individual *Rag1*<sup>-/-</sup> mice (8-10 weeks old) were adoptively transferred with splenic cells  
470 equivalent to 5 million CD4<sup>+</sup> and CD8<sup>+</sup> iT cells from iT-B-NDG mice. Four days after  
471 iT cell transfer, the allogeneic skin (BALB/c background) was transplanted as described  
472 (70). Grafts were considered rejection if there was a loss of distinct border, visible signs  
473 of ulceration and necrosis to 80% of the graft area. The rejected skin tissues were  
474 removed for analysis 9 days after skin transplantation. For analysis activated iT cells in  
475 rejected skin grafts, the single cell suspensions were prepared as described (71). The  
476 activated alloreactive iT lymphocytes were defined as CD45.2<sup>+</sup>Ter119<sup>-</sup>CD11b<sup>-</sup>  
477 CD69<sup>+</sup>CD44<sup>+</sup>CD4<sup>+</sup>/CD8<sup>+</sup>. For analysis of cytokines released by the alloreactive iT cells,  
478 we used anti-IL17 and anti-IFN $\gamma$  antibodies following an intracellular staining protocol  
479 (eBioscience).

#### 480 **OT1-iT ANTI-TUMOR ASSAY**

481 For the reconstitution of the OT1-iT cells in *Rag1*<sup>-/-</sup> mice, three million OT1-iHPC were  
482 transplanted into each irradiated *Rag1*<sup>-/-</sup> mouse (4.5 Gy). OT1-iT cells (GFP<sup>+</sup> CD8<sup>+</sup>

483 TCRV $\beta$ 5<sup>+</sup> TCRV $\alpha$ 2<sup>+</sup>) in PB were analyzed six weeks post-transplantation. The E.G7-  
484 OVA cells were transplanted into the groin of the OT1-iT reconstituted mice by  
485 subcutaneous injection (0.2 million/mouse). The tumor size was measured every 2 days  
486 and was calculated as length  $\times$  width (mm<sup>2</sup>). Mice with tumor size larger than 20 mm  
487 at the longest axis were euthanized for ethical consideration. To analyze the tumor-  
488 infiltrating OT1-iT cells, tumors were isolated at day 15 and digested for 30 min at 37 °C  
489 by collagen IV solution (1mg/ml, Gibco) after being cut up. Then, the single-cell  
490 suspensions were harvested for staining. The activated iT cells were defined as  
491 CD45.2<sup>+</sup>GFP<sup>+</sup>CD8<sup>+</sup>CD44<sup>+</sup>CD62L<sup>-</sup>.

#### 492 **RNA-SEQ AND DATA ANALYSIS**

493 The cDNA of single iHEC sorted on day 11, and iHPC at Day 14, 17, and 21 or 1,000-  
494 CD4SP/CD8SP iT-cell aliquots of from spleens of iT-B-NDG mice were generated and  
495 amplified using Discover-sc WTA Kit V2 (Vazyme). The quality of amplified cDNA  
496 was assessed by qPCR analysis of housekeeping genes (B2m and Gapdh). Samples that  
497 passed quality control were used for sequencing library preparation by TruePrep DNA  
498 Library Prep Kit V2 (Vazyme). All libraries were sequenced by illumina sequencer  
499 NextSeq 500. The raw data (fastq files) were generated using bcl2fastq software  
500 (version 2.16.0.10) and were uploaded to the Gene Expression Omnibus public  
501 database (GSE121371, GSE121373, GSE128738). The raw reads were aligned to  
502 mouse genome mm10 by HISAT2 (version 2.1.0) (72) and the expression levels in TPM  
503 were estimated by StringTie (version 1.3.4) (73, 74). The wildtype CD4SP T cells,  
504 CD8SP T cells, myeloid cells, and B cells sequencing data (GSE105057) were

505 downloaded from Gene Expression Omnibus (75). Heat maps were plotted using  
506 pheatmap (version 1.0.8). The natural embryonic single-cell data (endothelial cells  
507 (CD31<sup>+</sup>VE-cadherin<sup>+</sup>CD41<sup>-</sup>CD43<sup>-</sup>CD45<sup>-</sup>Ter119<sup>-</sup>) and pre-HSCs (CD31<sup>+</sup>CD45<sup>-</sup>  
508 CD41<sup>low</sup>c-kit<sup>+</sup>CD201<sup>high</sup>) were downloaded from Gene Expression Omnibus  
509 (GSE67120) (22). The batch effects of single-cell data between iHEC and natural  
510 embryonic cells were removed using ComBat (sva R package, version 3.26.0). The  
511 prcomp function of stats (R package, version 3.4.4) was used for PCA. The DESeq2  
512 was used for differential expression analysis. The PCA plot and violin plot were plotted  
513 using ggplot2 (R package, version 2.2.1). tSNE was performed by Rtsne (R package  
514 version 0.15). The TPM values of transcription factors were log<sub>2</sub>-converted.

515 For TCR $\alpha\beta$  sequencing, 15,000 sorted CD4SP, and CD8SP naïve iT cells were sorted  
516 from thymus or spleen of iT-B-NDG mice. The sorted iT cells of thymus were gated on  
517 CD45.2<sup>+</sup>Ter119<sup>-</sup>CD11b<sup>-</sup>Gr1<sup>-</sup>CD19<sup>-</sup>B220<sup>-</sup>NK1.1<sup>-</sup>TCR $\gamma\delta$ <sup>-</sup>CD4<sup>+</sup>CD8<sup>-</sup> and  
518 CD45.2<sup>+</sup>Ter119<sup>-</sup>CD11b<sup>-</sup>Gr1<sup>-</sup>CD19<sup>-</sup>B220<sup>-</sup>NK1.1<sup>-</sup>TCR $\gamma\delta$ <sup>-</sup>CD4<sup>-</sup>CD8<sup>+</sup>. The splenic naïve  
519 iT cells were gated on CD45.2<sup>+</sup>CD4<sup>+</sup>CD8<sup>-</sup>CD62L<sup>+</sup>CD44<sup>-</sup> and CD45.2<sup>+</sup>CD4<sup>-</sup>  
520 CD8<sup>+</sup>CD62L<sup>+</sup>CD44<sup>-</sup>. The cDNA was generated and amplified by SMARTer Mouse  
521 TCR $\alpha\beta$  Profiling Kit (Clontech). Libraries were sequenced by illumina sequencer  
522 MiSeq (2 $\times$ 250 cycles). The raw data (fastq files) were generated using illumina  
523 bcl2fastq software and were uploaded to Gene Expression Omnibus public database  
524 (GSE121374). T cell receptors  $\alpha\beta$  chains repertoires were aligned and assembled using  
525 software MiXCR (version 2.1.12) (48). The TCR $\alpha\beta$  clonotypes were exported  
526 respectively by parameter '--chains' in exportClones command of MiXCR. The



527 exported clonotypes were visualized in the form of chord diagram using VDJtools  
528 software (version 1.1.10) (76).

## 529 STATISTICS

530 All quantitative analyses were based on a minimum of at least three sample replicates.  
531 Data are presented as means  $\pm$  s.d. by GraphPad Prism. Independent-sample student T  
532 test and One-way ANOVA were performed (SPSS). NS, no significance; \* $p < 0.05$ ; \*\* $p$   
533  $< 0.01$ ; \*\*\* $p < 0.001$ .

534

## 535 REFERENCES

- 536 1. G. Gross, G. Gorochoy, T. Waks, Z. Eshhar, Generation of effector T cells expressing chimeric T  
537 cell receptor with antibody type-specificity. *Transplant Proc* **21**, 127-130 (1989).
- 538 2. R. A. Morgan *et al.*, Cancer regression in patients after transfer of genetically engineered  
539 lymphocytes. *Science* **314**, 126-129 (2006).
- 540 3. J. Hartmann, M. Schussler-Lenz, A. Bondanza, C. J. Buchholz, Clinical development of CAR T  
541 cells-challenges and opportunities in translating innovative treatment concepts. *EMBO Mol*  
542 *Med* **9**, 1183-1197 (2017).
- 543 4. M. Sadelain, I. Riviere, S. Riddell, Therapeutic T cell engineering. *Nature* **545**, 423-431 (2017).
- 544 5. K. Takahashi, S. Yamanaka, Induction of pluripotent stem cells from mouse embryonic and  
545 adult fibroblast cultures by defined factors. *Cell* **126**, 663-676 (2006).
- 546 6. T. M. Schmitt, J. C. Zuniga-Pflucker, Induction of T cell development from hematopoietic  
547 progenitor cells by delta-like-1 in vitro. *Immunity* **17**, 749-756 (2002).
- 548 7. M. Mohtashami *et al.*, Direct comparison of Dll1- and Dll4-mediated Notch activation levels  
549 shows differential lymphomyeloid lineage commitment outcomes. *J Immunol* **185**, 867-876  
550 (2010).
- 551 8. A. Montel-Hagen *et al.*, Organoid-Induced Differentiation of Conventional T Cells from Human  
552 Pluripotent Stem Cells. *Cell Stem Cell* **24**, 376-389 e378 (2019).
- 553 9. G. Awong *et al.*, Human proT-cells generated in vitro facilitate hematopoietic stem cell-derived  
554 T-lymphopoiesis in vivo and restore thymic architecture. *Blood* **122**, 4210-4219 (2013).
- 555 10. S. Shukla *et al.*, Progenitor T-cell differentiation from hematopoietic stem cells using Delta-like-  
556 4 and VCAM-1. *Nat Methods* **14**, 531-538 (2017).
- 557 11. T. M. Schmitt *et al.*, Induction of T cell development and establishment of T cell competence  
558 from embryonic stem cells differentiated in vitro. *Nat Immunol* **5**, 410-417 (2004).
- 559 12. V. M. Sandler *et al.*, Reprogramming human endothelial cells to haematopoietic cells requires  
560 vascular induction. *Nature* **511**, 312-318 (2014).
- 561 13. R. Sugimura *et al.*, Haematopoietic stem and progenitor cells from human pluripotent stem

- 562 cells. *Nature* **545**, 432-438 (2017).
- 563 14. J. Riddell *et al.*, Reprogramming committed murine blood cells to induced hematopoietic stem  
564 cells with defined factors. *Cell* **157**, 549-564 (2014).
- 565 15. R. Lis *et al.*, Conversion of adult endothelium to immunocompetent haematopoietic stem cells.  
566 *Nature* **545**, 439-445 (2017).
- 567 16. G. Stik, T. Graf, Hoxb5, a Trojan horse to generate T cells. *Nat Immunol* **19**, 210-212 (2018).
- 568 17. E. Dzierzak, A. Bigas, Blood Development: Hematopoietic Stem Cell Dependence and  
569 Independence. *Cell Stem Cell* **22**, 639-651 (2018).
- 570 18. M. Yoshimoto *et al.*, Autonomous murine T-cell progenitor production in the extra-embryonic  
571 yolk sac before HSC emergence. *Blood* **119**, 5706-5714 (2012).
- 572 19. T. C. Luis *et al.*, Initial seeding of the embryonic thymus by immune-restricted lympho-myeloid  
573 progenitors. *Nat Immunol* **17**, 1424-1435 (2016).
- 574 20. Y. Tian *et al.*, The first wave of T lymphopoiesis in zebrafish arises from aorta endothelium  
575 independent of hematopoietic stem cells. *J Exp Med* **214**, 3347-3360 (2017).
- 576 21. M. A. Yui, E. V. Rothenberg, Developmental gene networks: a triathlon on the course to T cell  
577 identity. *Nat Rev Immunol* **14**, 529-545 (2014).
- 578 22. F. Zhou *et al.*, Tracing haematopoietic stem cell formation at single-cell resolution. *Nature* **533**,  
579 487-492 (2016).
- 580 23. P. Sroczynska, C. Lancrin, V. Kouskoff, G. Lacaud, The differential activities of Runx1 promoters  
581 define milestones during embryonic hematopoiesis. *Blood* **114**, 5279-5289 (2009).
- 582 24. M. J. Chen, T. Yokomizo, B. M. Zeigler, E. Dzierzak, N. A. Speck, Runx1 is required for the  
583 endothelial to haematopoietic cell transition but not thereafter. *Nature* **457**, 887-891 (2009).
- 584 25. T. E. North *et al.*, Runx1 expression marks long-term repopulating hematopoietic stem cells in  
585 the midgestation mouse embryo. *Immunity* **16**, 661-672 (2002).
- 586 26. Q. Wang *et al.*, Disruption of the Cbfa2 gene causes necrosis and hemorrhaging in the central  
587 nervous system and blocks definitive hematopoiesis. *Proc Natl Acad Sci U S A* **93**, 3444-3449  
588 (1996).
- 589 27. T. Okuda, J. van Deursen, S. W. Hiebert, G. Grosveld, J. R. Downing, AML1, the target of multiple  
590 chromosomal translocations in human leukemia, is essential for normal fetal liver  
591 hematopoiesis. *Cell* **84**, 321-330 (1996).
- 592 28. H. M. Eilken, S. Nishikawa, T. Schroeder, Continuous single-cell imaging of blood generation  
593 from haemogenic endothelium. *Nature* **457**, 896-900 (2009).
- 594 29. C. F. Pereira *et al.*, Induction of a hemogenic program in mouse fibroblasts. *Cell Stem Cell* **13**,  
595 205-218 (2013).
- 596 30. S. Pearson, S. Cuvertino, M. Fleury, G. Lacaud, V. Kouskoff, In vivo repopulating activity emerges  
597 at the onset of hematopoietic specification during embryonic stem cell differentiation. *Stem*  
598 *Cell Reports* **4**, 431-444 (2015).
- 599 31. C. W. So, H. Karsunky, P. Wong, I. L. Weissman, M. L. Cleary, Leukemic transformation of  
600 hematopoietic progenitors by MLL-GAS7 in the absence of Hoxa7 or Hoxa9. *Blood* **103**, 3192-  
601 3199 (2004).
- 602 32. V. Ramos-Mejia *et al.*, HOXA9 promotes hematopoietic commitment of human embryonic  
603 stem cells. *Blood* **124**, 3065-3075 (2014).
- 604 33. M. Magnusson *et al.*, HOXA10 is a critical regulator for hematopoietic stem cells and  
605 erythroid/megakaryocyte development. *Blood* **109**, 3687-3696 (2007).

- 606 34. K. Komorowska *et al.*, Hepatic Leukemia Factor Maintains Quiescence of Hematopoietic Stem  
607 Cells and Protects the Stem Cell Pool during Regeneration. *Cell Rep* **21**, 3514-3523 (2017).
- 608 35. K. L. Davis, Ikaros: master of hematopoiesis, agent of leukemia. *Ther Adv Hematol* **2**, 359-368  
609 (2011).
- 610 36. S. Nagel *et al.*, NKL homeobox gene activities in hematopoietic stem cells, T-cell development  
611 and T-cell leukemia. *PLoS One* **12**, e0171164 (2017).
- 612 37. K. Oakley *et al.*, Setbp1 promotes the self-renewal of murine myeloid progenitors via activation  
613 of Hoxa9 and Hoxa10. *Blood* **119**, 6099-6108 (2012).
- 614 38. E. S. Ng *et al.*, Differentiation of human embryonic stem cells to HOXA(+) hemogenic  
615 vasculature that resembles the aorta-gonad-mesonephros. *Nat Biotechnol* **34**, 1168-1179  
616 (2016).
- 617 39. M. A. Inlay *et al.*, Identification of multipotent progenitors that emerge prior to hematopoietic  
618 stem cells in embryonic development. *Stem Cell Reports* **2**, 457-472 (2014).
- 619 40. X. He, K. Park, D. J. Kappes, The role of ThPOK in control of CD4/CD8 lineage commitment. *Annu*  
620 *Rev Immunol* **28**, 295-320 (2010).
- 621 41. K. Germar *et al.*, T-cell factor 1 is a gatekeeper for T-cell specification in response to Notch  
622 signaling. *Proc Natl Acad Sci U S A* **108**, 20060-20065 (2011).
- 623 42. P. Aliahmad, A. Seksenyan, J. Kaye, The many roles of TOX in the immune system. *Curr Opin*  
624 *Immunol* **24**, 173-177 (2012).
- 625 43. E. H. Palacios, A. Weiss, Function of the Src-family kinases, Lck and Fyn, in T-cell development  
626 and activation. *Oncogene* **23**, 7990-8000 (2004).
- 627 44. T. Taghon, M. A. Yui, E. V. Rothenberg, Mast cell lineage diversion of T lineage precursors by the  
628 essential T cell transcription factor GATA-3. *Nat Immunol* **8**, 845-855 (2007).
- 629 45. P. Liu, P. Li, S. Burke, Critical roles of Bcl11b in T-cell development and maintenance of T-cell  
630 identity. *Immunol Rev* **238**, 138-149 (2010).
- 631 46. K. Hahm *et al.*, Helios, a T cell-restricted Ikaros family member that quantitatively associates  
632 with Ikaros at centromeric heterochromatin. *Genes Dev* **12**, 782-796 (1998).
- 633 47. T. Y. Halim *et al.*, Retinoic-acid-receptor-related orphan nuclear receptor alpha is required for  
634 natural helper cell development and allergic inflammation. *Immunity* **37**, 463-474 (2012).
- 635 48. D. A. Bolotin *et al.*, MiXCR: software for comprehensive adaptive immunity profiling. *Nat*  
636 *Methods* **12**, 380-381 (2015).
- 637 49. L. A. Garrett-Sinha, Review of Ets1 structure, function, and roles in immunity. *Cell Mol Life Sci*  
638 **70**, 3375-3390 (2013).
- 639 50. F. Zohren *et al.*, The transcription factor Lyl-1 regulates lymphoid specification and the  
640 maintenance of early T lineage progenitors. *Nat Immunol* **13**, 761-769 (2012).
- 641 51. H. Hock *et al.*, Tel/Etv6 is an essential and selective regulator of adult hematopoietic stem cell  
642 survival. *Genes Dev* **18**, 2336-2341 (2004).
- 643 52. K. T. Greig, S. Carotta, S. L. Nutt, Critical roles for c-Myb in hematopoietic progenitor cells. *Semin*  
644 *Immunol* **20**, 247-256 (2008).
- 645 53. A. C. Wilkinson *et al.*, Single-cell analyses of regulatory network perturbations using enhancer-  
646 targeting TALEs suggest novel roles for PU.1 during haematopoietic specification. *Development*  
647 **141**, 4018-4030 (2014).
- 648 54. S. H. M. Pang *et al.*, PU.1 Is Required for the Developmental Progression of Multipotent  
649 Progenitors to Common Lymphoid Progenitors. *Front Immunol* **9**, 1264 (2018).

- 650 55. R. Sugimura, The significance and application of vascular niche in the development and  
651 maintenance of hematopoietic stem cells. *Int J Hematol* **107**, 642-645 (2018).
- 652 56. V. Azcoitia, M. Aracil, A. C. Martinez, M. Torres, The homeodomain protein Meis1 is essential  
653 for definitive hematopoiesis and vascular patterning in the mouse embryo. *Dev Biol* **280**, 307-  
654 320 (2005).
- 655 57. C. H. Nam, T. H. Rabbitts, The role of LMO2 in development and in T cell leukemia after  
656 chromosomal translocation or retroviral insertion. *Mol Ther* **13**, 15-25 (2006).
- 657 58. Y. Yu *et al.*, Bcl11a is essential for lymphoid development and negatively regulates p53. *J Exp*  
658 *Med* **209**, 2467-2483 (2012).
- 659 59. D. Boutboul *et al.*, Dominant-negative IKZF1 mutations cause a T, B, and myeloid cell combined  
660 immunodeficiency. *J Clin Invest* **128**, 3071-3087 (2018).
- 661 60. A. P. Weng *et al.*, c-Myc is an important direct target of Notch1 in T-cell acute lymphoblastic  
662 leukemia/lymphoma. *Genes Dev* **20**, 2096-2109 (2006).
- 663 61. M. M. Del Real, E. V. Rothenberg, Architecture of a lymphomyeloid developmental switch  
664 controlled by PU.1, Notch and Gata3. *Development* **140**, 1207-1219 (2013).
- 665 62. S. Uehara *et al.*, Premature expression of chemokine receptor CCR9 impairs T cell development.  
666 *J Immunol* **176**, 75-84 (2006).
- 667 63. D. A. Zlotoff *et al.*, CCR7 and CCR9 together recruit hematopoietic progenitors to the adult  
668 thymus. *Blood* **115**, 1897-1905 (2010).
- 669 64. R. Tussiwand *et al.*, The preTCR-dependent DN3 to DP transition requires Notch signaling, is  
670 improved by CXCL12 signaling and is inhibited by IL-7 signaling. *Eur J Immunol* **41**, 3371-3380  
671 (2011).
- 672 65. M. L. Janas *et al.*, Thymic development beyond beta-selection requires phosphatidylinositol 3-  
673 kinase activation by CXCR4. *J Exp Med* **207**, 247-261 (2010).
- 674 66. H. J. Lawrence *et al.*, Mice bearing a targeted interruption of the homeobox gene HOXA9 have  
675 defects in myeloid, erythroid, and lymphoid hematopoiesis. *Blood* **89**, 1922-1930 (1997).
- 676 67. K. A. Gwin, M. B. Shapiro, J. J. Dolence, Z. L. Huang, K. L. Medina, Hoxa9 and Flt3 signaling  
677 synergistically regulate an early checkpoint in lymphopoiesis. *J Immunol* **191**, 745-754 (2013).
- 678 68. I. Desbaillets, U. Ziegler, P. Groscurth, M. Gassmann, Embryoid bodies: an in vitro model of  
679 mouse embryogenesis. *Exp Physiol* **85**, 645-651 (2000).
- 680 69. J. Chen *et al.*, Rational optimization of reprogramming culture conditions for the generation of  
681 induced pluripotent stem cells with ultra-high efficiency and fast kinetics. *Cell Res* **21**, 884-894  
682 (2011).
- 683 70. P. Lan, N. Tonomura, A. Shimizu, S. Wang, Y. G. Yang, Reconstitution of a functional human  
684 immune system in immunodeficient mice through combined human fetal thymus/liver and  
685 CD34+ cell transplantation. *Blood* **108**, 487-492 (2006).
- 686 71. X. Jiang *et al.*, Skin infection generates non-migratory memory CD8+ T(RM) cells providing  
687 global skin immunity. *Nature* **483**, 227-231 (2012).
- 688 72. D. Kim, B. Langmead, S. L. Salzberg, HISAT: a fast spliced aligner with low memory requirements.  
689 *Nat Methods* **12**, 357-360 (2015).
- 690 73. M. Pertea *et al.*, StringTie enables improved reconstruction of a transcriptome from RNA-seq  
691 reads. *Nat Biotechnol* **33**, 290-295 (2015).
- 692 74. M. Pertea, D. Kim, G. M. Pertea, J. T. Leek, S. L. Salzberg, Transcript-level expression analysis of  
693 RNA-seq experiments with HISAT, StringTie and Ballgown. *Nat Protoc* **11**, 1650-1667 (2016).

- 694 75. M. Zhang *et al.*, Transcription factor Hoxb5 reprograms B cells into functional T lymphocytes.  
695 *Nat Immunol* **19**, 279-290 (2018).  
696 76. M. Shugay *et al.*, VDJtools: Unifying Post-analysis of T Cell Receptor Repertoires. *PLoS Comput*  
697 *Biol* **11**, e1004503 (2015).

698

699

700 **FIGURES AND FIGURE LEGENDS**

Figure 1

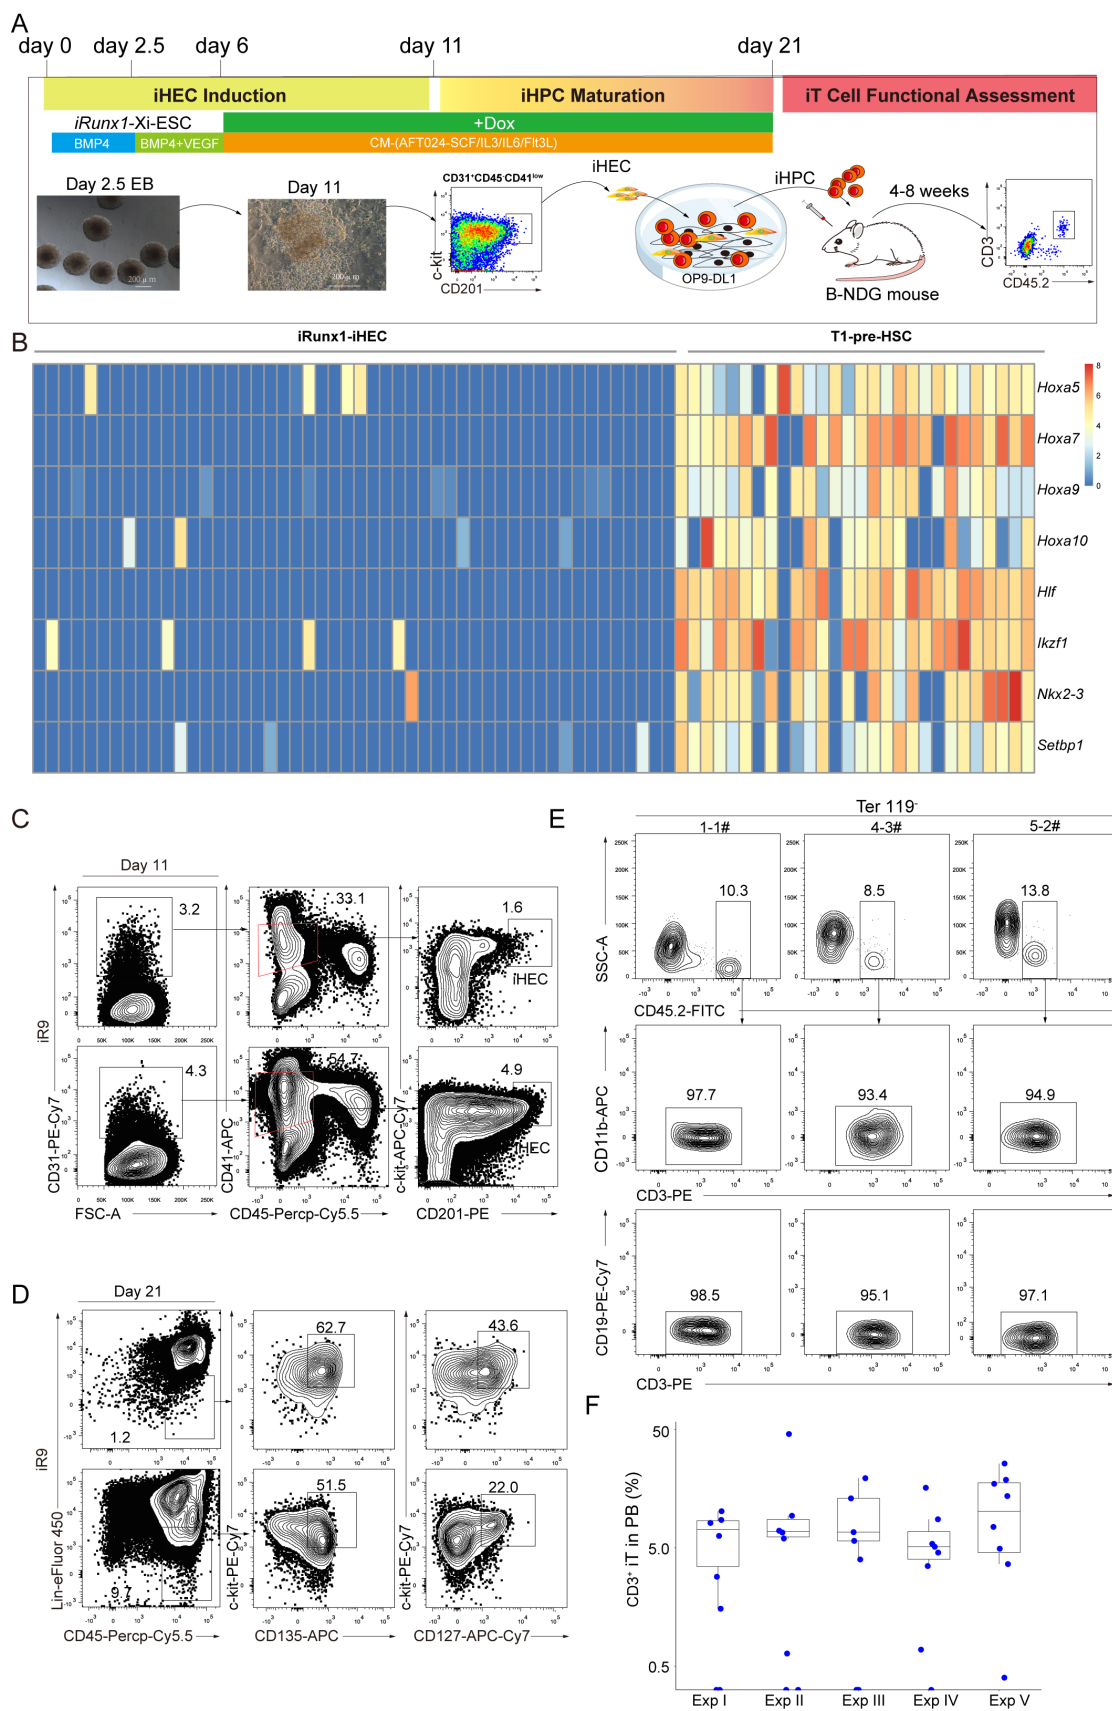

701

702 **Figure 1. T Cell Regeneration *in vivo* from *iRunx1-p2a-Hoxa9*-edited Embryonic**

703 **Stem Cells**

704 (A) The strategy of stepwise T lineage induction by defined transcription factors.

705 *iRunx1*-ESC, and *iRunx1*-Xi- ESC lines (C57BL/6 background, CD45.2 strain) were

706 used for T cell lineage induction. Xi means one of the eight transcription factors *Hoxa5*,

707 *Hoxa7*, *Hoxa9*, *Hoxa10*, *Hlf*, *Ikzf1*, *Nkx2-3*, *Setbp1*. For EB generation, each of the

708 gene-edited ESC lines was resuspended at 100000 cells/ml in basic differentiation

709 medium (BDM) supplemented with 5ng/ml BMP4 and plated at 20 ul/drop in inverted

710 15 cm dishes. At day 2.5, EBs were replanted into gelatinized plates in BDM

711 supplemented with 5 ng/ml BMP4 and 5 ng/ml VEGF. At day 6, the medium was

712 changed to BDM supplemented with 2% conditioned medium derived from the

713 supernatants of AFT024-mIL3, AFT024-mIL6, AFT024-hFlt3L and AFT024-mSCF

714 cell culture. Doxycycline (1 µg/ml) was added at day 6. Induced hemogenic endothelial

715 progenitors (iHEC) were defined as  $CD31^+CD41^{low}CD45^c\text{-kit}^+CD201^{high}$ . For

716 maturation step, the plates were pre-seeded with OP9-DL1 cells (20000 cells/well, 12-

717 well plate) 12 hours prior maturation in EM medium ( $\alpha$ -MEM, 15% DFBS, 200 µg/ml

718 iron-saturated transferrin, 0.45 mM monothiolglycerol, 1% glutaMAX, 50 µg/ml

719 ascorbic acid, 2% conditioned medium derived from supernatants of AFT024-mIL3,

720 AFT024-hFlt3L and AFT024-mSCF cell culture, and 1 µg/ml doxycycline. 100-500

721 sorted iHEC were plated into each well for maturation. The EM was half-replaced every

722 two days. After maturation, the bulk blood cells were assessed for T lineage generation

723 potential.

724 (B) Heatmaps of the eight transcription factors abundantly expressed in embryonic pre-  
725 HSC but rarely expressed in *iRunx1*-ES derived iHEC. The expression value (TPM) of  
726 each gene was converted by log2 and illustrated by heatmap (R package). One column  
727 represents one cell repeat. (*iRunx1*-iHEC, n=50 single cells, T1-pre-HSC, n=28 single  
728 cells).

729 (C) Sorting gates of iHEC population at day 11 derived from *iRunx1-Hoxa9*-ES line  
730 (*iR9*-ESC). Two representative plots from five independent experiments are shown.

731 (D) Immuno-phenotypes of pre-thymic progenitors in induced hematopoietic  
732 progenitor cells from iHEC after ten-day maturation. Two representative plots from  
733 five independent experiments. Lin was defined as CD2<sup>-</sup>CD3<sup>-</sup>CD4<sup>-</sup>CD8<sup>-</sup>CD11b<sup>-</sup>Gr1<sup>-</sup>  
734 Ter119<sup>-</sup>CD19<sup>-</sup>NK1.1<sup>-</sup>TCR $\gamma\delta$ <sup>-</sup>. Pre-thymic progenitors were defined as Lin<sup>-</sup>c-  
735 kit<sup>+</sup>CD127<sup>+</sup>/CD135<sup>+</sup>.

736 (E) Pluripotent stem cell-derived T cells in PB of B-NDG mice were analyzed by flow  
737 cytometry 4 weeks after transplantation. One million iHEC-derived hematopoietic cells  
738 were transplanted into individual B-NDG mice (CD45.1<sup>+</sup>) irradiated by X-ray (2.25  
739 Gy). Three representative mice from five independent experiments were analyzed.

740 (F) Summary of pluripotent stem cell-derived T cells in PB of individual B-NDG mice  
741 from five independent experiments. Forty B-NDG mice transplanted with ESC-derived  
742 iHPC were analyzed. The box plot shows the percentage of the CD3<sup>+</sup> iT cells in PB,  
743 the percentage values were illustrated by ggplot2 (R package). A base-10 logarithmic  
744 scale was used for the Y-axis. One point represents one mouse.



Figure 2

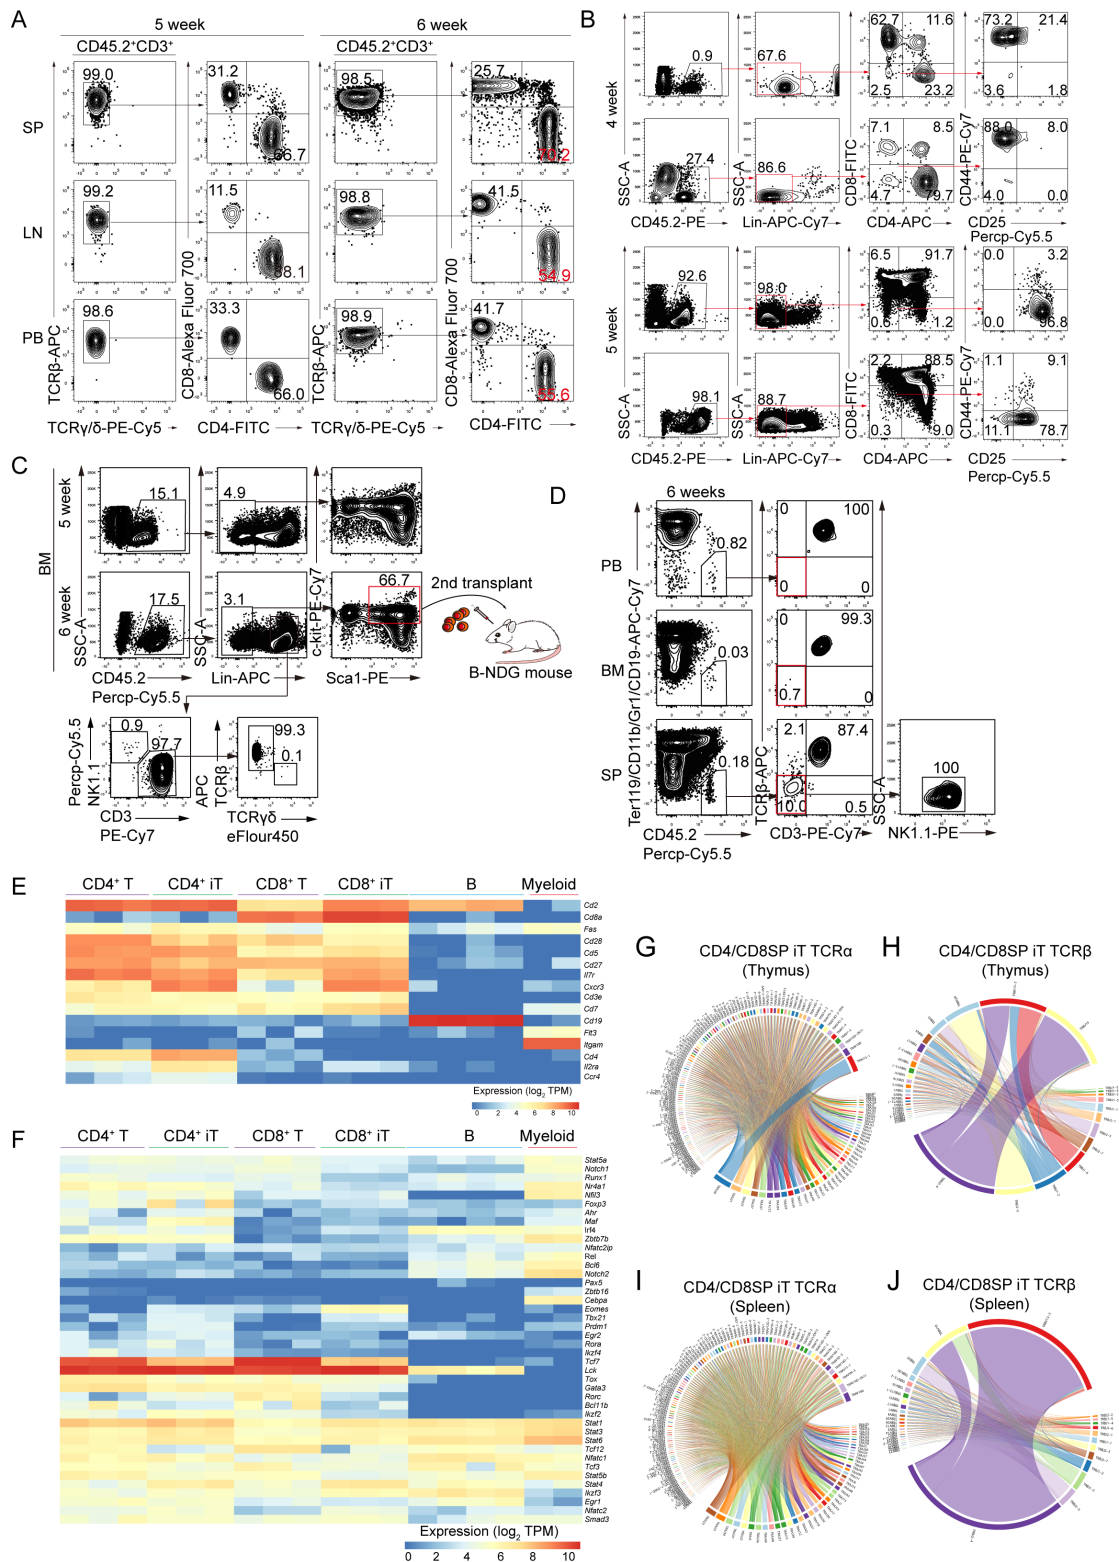

745

746 **Figure 2. Tissue Distributions, Transcriptome Characterization, and TCR $\alpha/\beta$**

747 **Diversities of ESC-derived T Cells**

748 (A) Flow cytometry analysis of mature iT cells in spleen (SP), lymph node (LN), and

749 peripheral blood (PB) of B-NDG mice transplanted with ESC-derived hematopoietic  
750 cells. Each B-NDG mouse was transplanted with one million iHPC collected on day 21.  
751 Representative mouse was sacrificed and analyzed at 5 and 6 weeks after  
752 transplantation. Data from two representative mice are shown.

753 (B) Flow cytometry analysis of iDN cells in the thymus of B-NDG mice transplanted  
754 with ESC-derived hematopoietic cells. Each B-NDG mouse was transplanted with one  
755 million iHPC at day 21. Representative mouse was sacrificed and analyzed at 4 and 5  
756 weeks after transplantation. Data from four representative mice of two independent  
757 experiments are shown. Lin was defined as Ter119<sup>-</sup>CD11b<sup>-</sup>Gr1<sup>-</sup>CD19<sup>-</sup>B220<sup>-</sup>NK1.1<sup>-</sup>  
758 TCRγδ<sup>-</sup>.

759 (C) Flow cytometry analysis of iHPC in bone marrow (BM) transplanted with iHPC.  
760 Each B-NDG mouse was transplanted with one million iHPC collected at day 10 in the  
761 presence of OP9-DL1 feeder cells. Representative mouse was sacrificed and analyzed  
762 5 weeks and 6 weeks after transplantation. The BM-derived iHPC (CD45.2<sup>+</sup>Lin<sup>-</sup>c-  
763 kit<sup>mid</sup>Sca1<sup>+</sup>) were sorted for 2nd transplantation. Data from two mice are shown.

764 (D) Flow cytometry analysis of iT and iNK in PB, spleen (SP) and bone marrow (BM)  
765 6 weeks after 2nd transplantation. 500 LSK cells from primary iT mice were used as  
766 input for secondary transplantation. The secondary recipients were sacrificed and  
767 analyzed 6 weeks after transplantation. Data from one mouse are shown.

768 (E) Characterization of surface markers on CD4SP and CD8SP iT cells. CD4SP and  
769 CD8SP iT cells were sorted from the spleens of B-NDG mice transplanted with ESC  
770 derived hematopoietic cells at week-5. One thousand sorted CD4SP or CD8SP iT cells

771 were used as cell input for each RNA-Seq cell sample. Wild type CD4SP cells and  
772 CD8SP cells were sorted from the spleen of wild type mouse (CD45.2, C57BL/6). Wild  
773 type B cells and myeloid cells were sorted from the bone marrow of wild type mouse  
774 (CD45.2, C57BL/6). The RNA-Seq raw data were aligned to the mouse genome mm10  
775 (hisat2 linux version 2.1.0), and normalized (Stringtie, linux version 1.3.4). The gene  
776 expression values (TPM) were log<sub>2</sub> converted and further presented as heatmaps  
777 (pheatmap 1.0.8 R package). One biological replicate per column. Myeloid cells (n = 2  
778 sample repeats): Ter119<sup>-</sup>CD3<sup>-</sup>CD19<sup>-</sup>CD11b<sup>+</sup>; B cells (n = 4 sample repeats): Ter119<sup>-</sup>  
779 CD11b<sup>-</sup>CD3<sup>-</sup>CD19<sup>+</sup>; CD4<sup>+</sup> cells (n = 3 sample repeats): Ter119<sup>-</sup>CD19<sup>-</sup>CD11b<sup>-</sup>CD4<sup>+</sup>;  
780 CD8<sup>+</sup> cells (n = 3 sample repeats): Ter119<sup>-</sup>CD19<sup>-</sup>CD11b<sup>-</sup>CD8<sup>+</sup> iCD4<sup>+</sup> cells (n = 3  
781 sample repeats): CD45.2<sup>+</sup>Ter119<sup>-</sup>CD19<sup>-</sup>CD11b<sup>-</sup>CD4<sup>+</sup>; iCD8<sup>+</sup> cells (n = 3 sample  
782 repeats): CD45.2<sup>+</sup>Ter119<sup>-</sup>CD19<sup>-</sup>CD11b<sup>-</sup>CD8<sup>+</sup>.

783 (F) Characterization of transcription factors in CD4SP and CD8SP iT cells. e, Chord  
784 diagram of TCR $\alpha$  diversity in thymus iT cells.

785 (G) Chord diagram of TCR $\beta$  diversity in thymus iT cells.

786 (H) Chord diagram of TCR $\alpha$  diversity in thymus iT cells.

787 (I) Chord diagram of TCR $\beta$  diversity in spleen iT cells.

788 (J) Clonotype counts of TCR $\alpha\beta$  in iT cells. Aliquots of sorted 15,000 naïve CD4SP and  
789 CD8SP iT cells from either thymus or spleen of iT-B-NDG mice were used as cell  
790 inputs for TCR $\alpha\beta$  sequencing. The TCR $\alpha\beta$  cDNA was amplified by SMARTer Mouse  
791 TCR a/b Profiling Kit and sequenced by MiSeq (illumina). The fastq raw data were  
792 processed by MiXCR and illustrated by VDJtools.

Figure 3

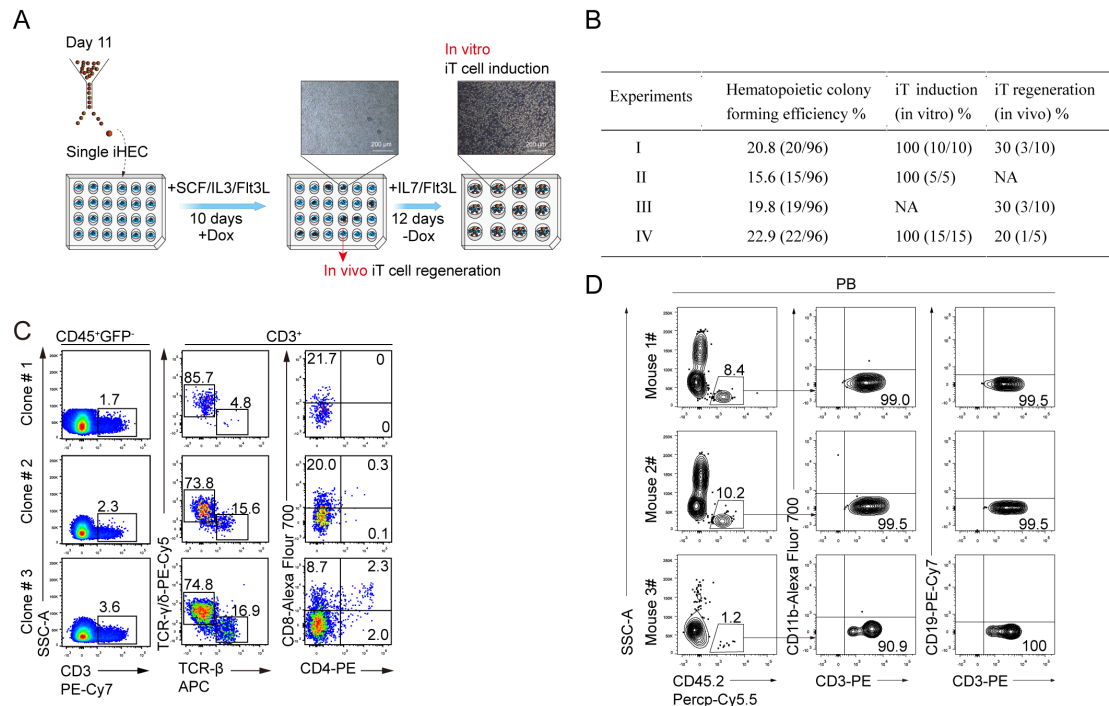

793

794 **Figure 3. Assessment of T Potential of Single iHEC from *iR9*-ESC**

795 (A) The strategy of T cell induction from *iR9*-ESC-derived single iHEC. Single iHEC  
 796 were sorted into individual wells (24-well plates) pre-seeded with OP9-DL1 feeder cells  
 797 (10000 cells/well) 12 hours prior maturation in EM medium with doxycycline (1  $\mu$ g/ml).  
 798 Doxycycline was sustained for 10 days during the maturation step. After maturation,  
 799 the bulk blood cells were assessed for T lineage generation potential. For in vivo T cell  
 800 regeneration, the single iHEC-derived bulk hematopoietic cells (day 10) were  
 801 transplanted into individual B-NDG recipients. For in vitro T cell induction, the  
 802 medium was changed to T cell induction medium (TIM,  $\alpha$ -MEM, 20% DFBS, and 1%  
 803 glutaMAX) supplemented with 2% conditioned medium derived from supernatants of  
 804 AFT024-hFlt3L and AFT024-hIL7 cell culture for sustaining 10 days.

805 (B) Single iHEC efficiently gave rise to T cells. Three hundred and eighty-four single-  
 806 iHEC at Day 11 were sorted into individual wells (24 well plates). Thirty single-iHEC-

807 formed blood colonies were induced for T cell generation *in vitro*. Cell collections of  
808 Twenty-five single-iHEC-formed blood colonies were transplanted into 25 individual  
809 B-NDG mice for the assessment of T lymphopoiesis *in vivo*.

810 (C) Flow cytometry analysis of induced T cells from *in vitro* induction of single iHEC.  
811 iT cells from single iHEC culture product (day 22) were analyzed. Plots of iT cells  
812 induced from one representative colony are shown.

813 (D) Single iHEC-derived hematopoietic cells gave rise to mature iT cells in PB of B-  
814 NDG recipient mice 4 weeks after transplantation. Plots of one representative mouse  
815 are shown.

Figure 4

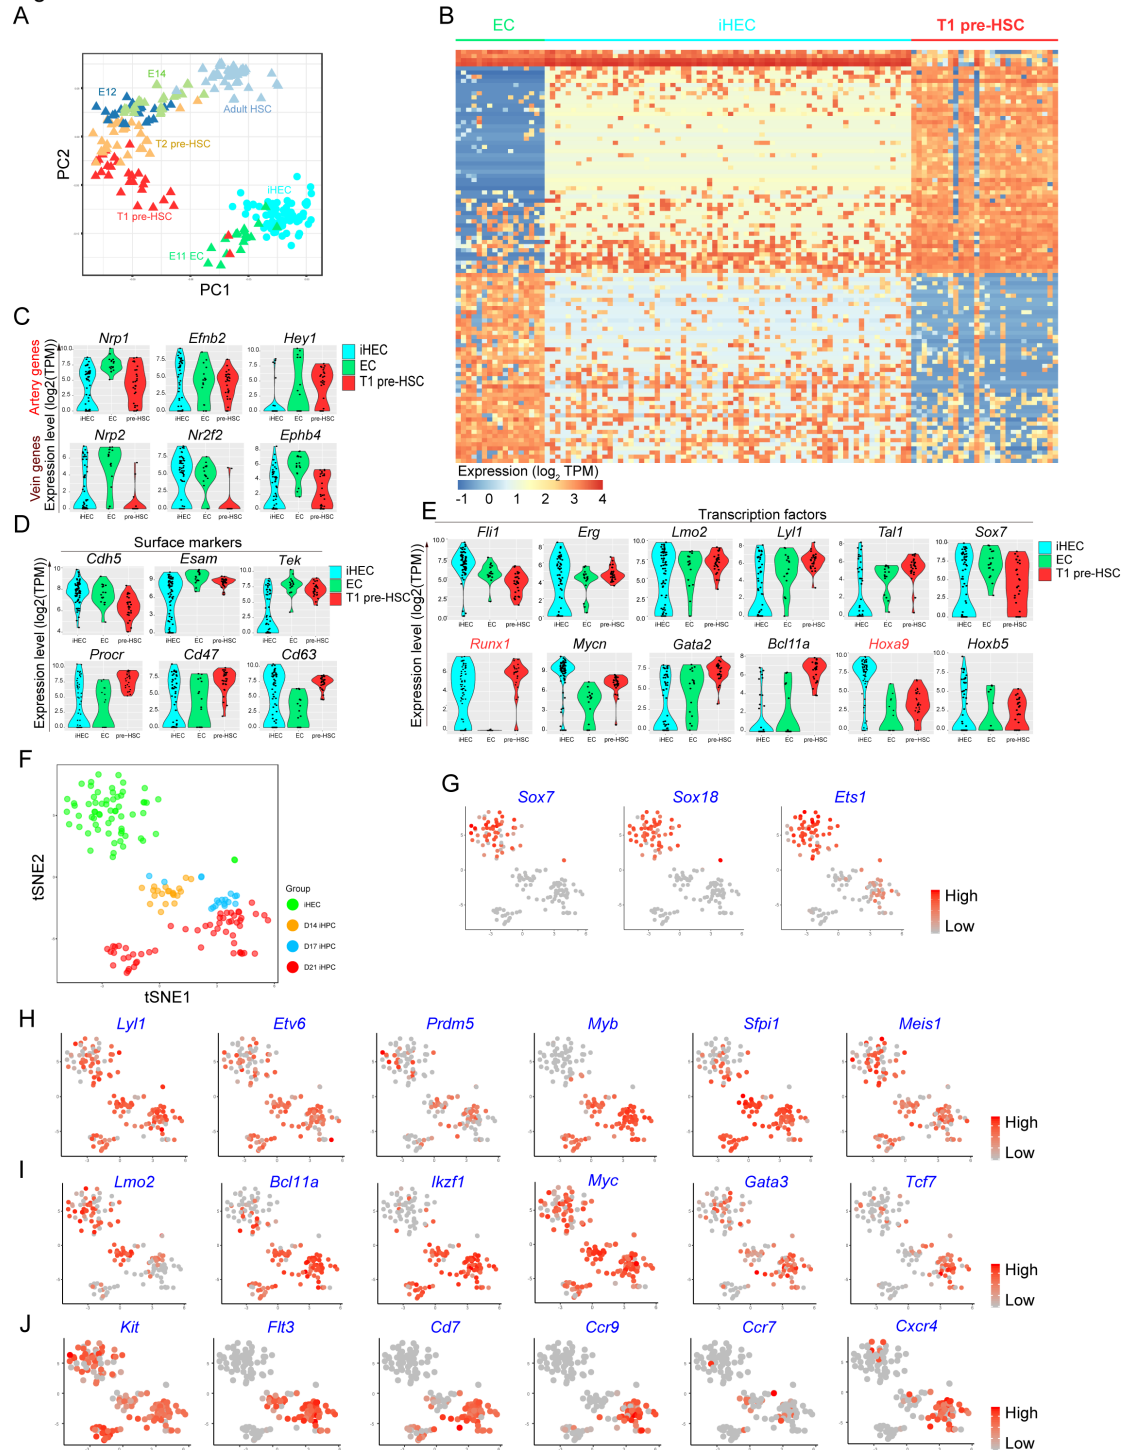

816

817 **Figure 4. Single-cell Transcriptomic Characterization of iHEC and iHPC**

818 (A) Principal component analysis (PCA) of iHEC and developmental E11 AGM-

819 derived EC, T1 pre-HSC, T2 pre-HSC, E12 HSC, E14 HSC, and adult HSC. The single-

820 cell RNAseq data were aligned to the mouse genome mm10 with Hisat2. The output

821 sam files were sorted with samtools. The TPM values of iHEC (n = 70), natural E11  
822 AGM-derived EC (n = 17), T1 pre-HSC (n = 28), T2 pre-HSC (n = 32), E12 HSC (n =  
823 21), E14 HSC (n = 32) and adult HSC (n = 47) single-cell RNA-Seq data were  
824 calculated with Stringtie package. ComBat from sva package was applied to remove  
825 the batch effect. Genes with TPM value > 1 in at least 3 samples were kept. Top 1000  
826 genes ranked by standard deviation were used for PCA (stats, R package) and graphed  
827 (ggplot2, R package). Cell types were defined as: embryonic EC (CD31<sup>+</sup>VE-  
828 cadherin<sup>+</sup>CD41<sup>-</sup>CD43<sup>-</sup>CD45<sup>-</sup>Ter119<sup>-</sup>), T1 pre-HSC (CD31<sup>+</sup>CD45<sup>-</sup>CD41<sup>low</sup>c-  
829 kit<sup>+</sup>CD201<sup>high</sup>), T2 pre-HSC (CD31<sup>+</sup>CD45<sup>+</sup>c-Kit<sup>+</sup>CD201<sup>+</sup>), E12 HSC (Lin<sup>-</sup>Sca-  
830 1<sup>+</sup>CD11b<sup>low</sup>CD201<sup>+</sup>), E14 HSC (CD45<sup>+</sup>CD150<sup>+</sup>CD48<sup>-</sup>CD201<sup>+</sup>), and adult HSC  
831 (CD45<sup>+</sup>CD150<sup>+</sup>CD48<sup>-</sup>CD201<sup>+</sup>).

832 (B) The expression of the top 100 genes contributing most to PC2 (50 genes for each  
833 direction). The expression value (TPM) of each gene was converted by log2 and  
834 illustrated by pheatmap (R package). One column represents one cell repeat.

835 (C) Violin plots show the expression profile of selected artery (A) and vein (V) related  
836 genes in single iHEC. The expression value (TPM) of each gene was converted by log2  
837 and illustrated by ggplot2 (R package). One point represents one cell.

838 (D) Violin plots show the expression profile of selected surface markers in single iHEC.  
839 The expression value (TPM) of each gene was converted by log2 and illustrated by  
840 ggplot2 (R package). One point represents one cell.

841 (E) Violin plots show the expression profile of selected transcription factors related to  
842 hematopoietic development in single iHEC. The expression value (TPM) of each gene

843 was converted by log<sub>2</sub> and illustrated by ggplot2 (R package). One point represents one  
844 cell.

845 (F) Two-dimensional tSNE analysis of iHEC and iHPC single-cell RNA-Seq. For  
846 single-cell RNA-Seq, the iHEC were collected on day 11, and the iHPC were collected  
847 at Day14, 17 and 21. The tSNE was performed by Rtsne (R package) and illustrated by  
848 ggplot2 (R package). The expression value (TPM) of each gene was converted by log<sub>2</sub>  
849 and illustrated by ggplot2 (R package). Each dot represents one cell. The TPM values  
850 of iHEC (n = 65), iHPC at Day14 (n = 21), Day17 (n = 18) and Day21 (n = 56) from  
851 single-cell RNA-Seq data were calculated with Stringtie package. Cell types were  
852 defined as: iHEC CD31<sup>+</sup>CD41<sup>low</sup>CD45<sup>c-kit</sup>CD201<sup>high</sup>; Day14 and Day17 iHPC,  
853 CD45<sup>+</sup>Lin(Ter119/Gr1/F4-80/CD2/CD3/CD4/CD8/CD19/FcεRIα)<sup>-</sup>; Day21 iHPC  
854 Ter119<sup>-</sup>CD45<sup>+</sup>c-kit<sup>+</sup> CD127<sup>+</sup>.

855 (G) tSNE analysis of the expression pattern of selected endothelia-related transcription  
856 factors in iHEC and iHPC.

857 (H) tSNE analysis of the expression pattern of selected hematopoietic-related  
858 transcription factors in iHEC and iHPC.

859 (I) tSNE analysis of the expression pattern of selected T cell development-related  
860 transcription factors in iHEC and iHPC at Day14, Day17, and Day21.

861 (J) tSNE analysis of the expression pattern of selected lymphopoiesis-related surface  
862 protein-coding genes in iHEC and iHPC at Day14, Day17, and Day21.

863



Figure 5

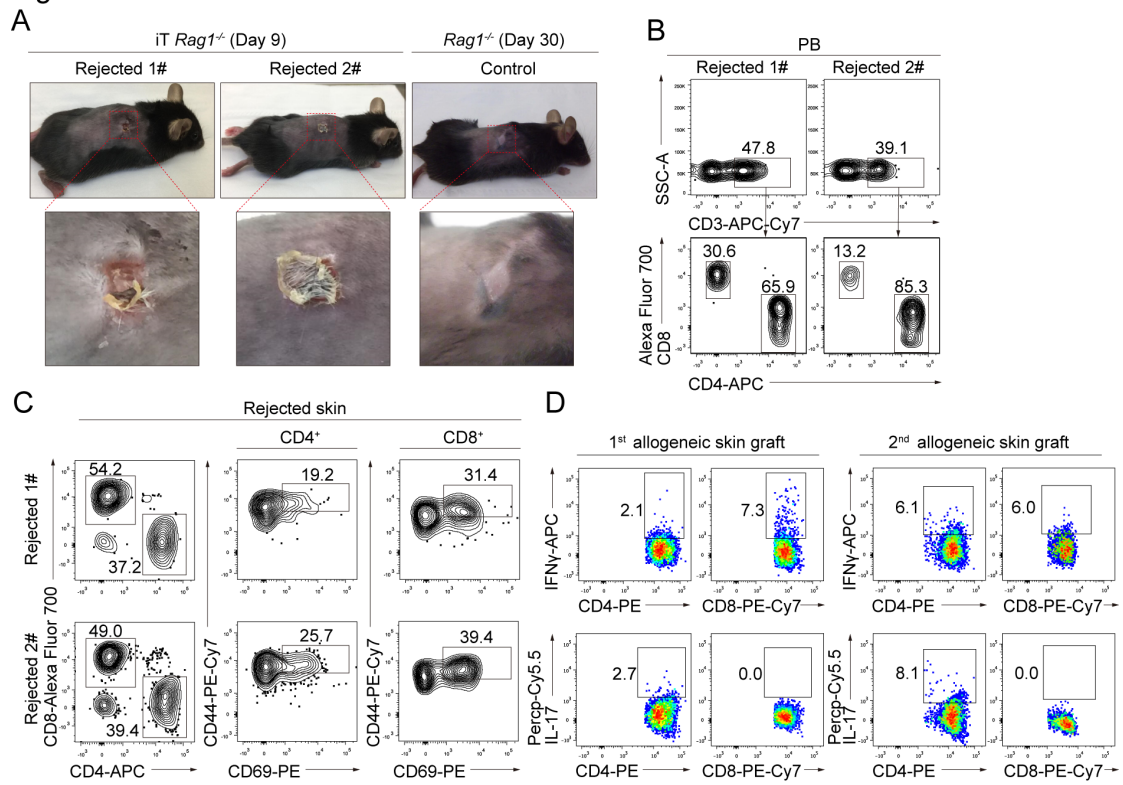

864

865 **Figure 5. iT Cells Reject Allogeneic Skin in Adoptively Transferred *Rag1*<sup>-/-</sup> Mice**

866 (A) The images of allogeneic skin grafts. Representative images of rejected allogeneic

867 skin tissues on ESC-iT-*Rag1*<sup>-/-</sup> (day 9) mice (n = 2) and grafted skin tissue on control

868 *Rag1*<sup>-/-</sup> mice (day 30) were shown. Eight-week-old *Rag1*<sup>-/-</sup> mice (C57BL/6 background)

869 were transplanted with 5 million CD4<sup>+</sup> and CD8<sup>+</sup> ESC-iT cells by retro-orbital vein

870 injection. The allogeneic skin sections from the bottom of BALB/c mouse tail were

871 grafted into the back of the *Rag1*<sup>-/-</sup> recipient mice at day 4 after the ESC-iT cell transfer.

872 (B) Flow cytometry analysis of the ESC-iT cells in peripheral blood (PB) of adoptively

873 ESC-iT transferred *Rag1*<sup>-/-</sup> recipients nine days after the allogeneic skin grafted. Plots

874 of two representative mice are shown.

875 (C) Flow cytometry analysis of the activation status of the ESC-iT cells in the rejected

876 allogeneic skin tissues. The rejected allogeneic skin tissues were from the adoptively

877 ESC-iT transferred *Rag1*<sup>-/-</sup> recipients nine days after the allogeneic skin grafted. The  
878 single cells were isolated from the rejected skin tissues after digestion by collagenase I.  
879 The activated ESC-iT cells were defined as CD4<sup>+</sup>/CD8<sup>+</sup> CD44<sup>high</sup> CD69<sup>+</sup>. Rejected skin  
880 tissues from two representative ESC-iT transferred *Rag1*<sup>-/-</sup> mice were analyzed.  
881 (D) Flow cytometry analysis of the intracellular cytokine IFN $\gamma$  and IL-17 secreted by  
882 the CD4<sup>+</sup> or CD8<sup>+</sup> ESC-iT cells in rejected allogeneic skin tissues. 1<sup>st</sup> allogeneic skin  
883 grafts were analyzed at day 9 and 2<sup>nd</sup> allogeneic skin grafts were analyzed at day 6 after  
884 skin transplantation. Data from primary and secondary rejected skin tissues from one  
885 representative ESC-iT cells transferred *Rag1*<sup>-/-</sup> mouse are shown.

Figure 6

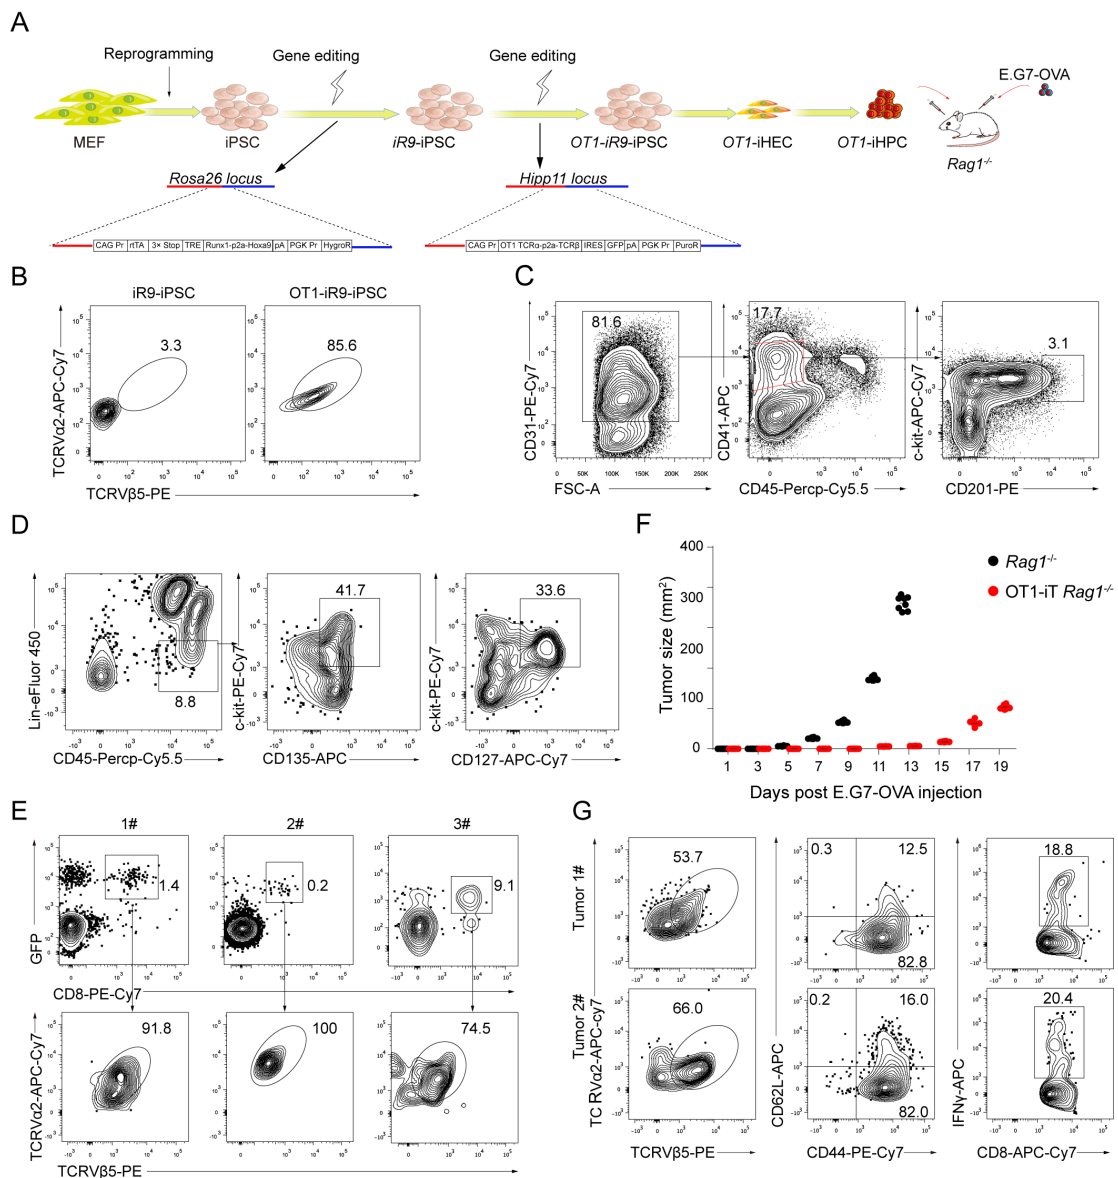

886

887 **Figure 6. OT1-iT Cell Therapy Suppresses the Solid Tumor Growth in Mice**

888 **Transplanted with E.G7-OVA Cells**

889 (A) Schematic diagram of OT1 engineered iT cells for anti-tumor therapy. Mouse MEF

890 cells were isolated from CD45.2<sup>+</sup> C57BL/6 mouse and reprogrammed into iPSC with

891 Oct4, Klf4, and Sox2 retro-viruses. Then a *rtTA-TRE-Runx1-Hoxa9-HygroR* DNA

892 cassette was inserted into the *Rosa26 locus*. The *iR9*-iPSC clones were selected by

893 hygromycin B (150 μg/ml). Next, a *CAG-OT1-IRES-GFP-PuroR* expression element

894 was inserted into the *Hipp11 locus* of *iR9*-iPSC. The OT1-*iR9*-iPSC clones were further  
895 selected by puromycin (1  $\mu$ g/ml). OT1-*iR9*-iPSC results in the production of CD8<sup>+</sup> T  
896 cells carrying TCRV $\alpha$ 2 and TCRV $\beta$ 5 (MHC class I-restricted, ovalbumin-specific  
897 TCR). OT1-*iR9*-iPSC-derived iHEC were induced into iHPC (OT1-iHPC) as described  
898 in material and method sections. The iHPC were injected into irradiated (4.5 Gy) *Rag1*<sup>-</sup>  
899 <sup>-</sup> recipient mice (3 million/mouse, 8-10-week-old C57BL/6 background). E.G7-OVA  
900 tumor cell line (C57BL/6 background) were transplanted into the groin of the *Rag1*<sup>-</sup>  
901 (n = 8) or OT1-iT-*Rag1*<sup>-</sup> (n = 8) by subcutaneous injection (0.2 million/mouse) six  
902 weeks after OT1-iHPC transplantation.

903 (B) TCRV $\alpha$ 2 and TCRV $\beta$ 5 expression in OT1-*iR9*-iPSC measured by intracellular  
904 staining. The *iR9*-iPSC was used as negative control.

905 (C) Sorting gates of the OT1-*iR9*-iPSC-derived iHEC population at day 11. The cells  
906 were enriched by streptavidin-beads recognizing biotin-CD31 before sorting.  
907 Representative plots from three independent experiments are shown.

908 (D) Immuno-phenotypes of pre-thymic progenitors in induced hematopoietic  
909 progenitor cells from OT1-*iR9*-iPSC-derived iHEC after ten-day maturation.  
910 Representative plots from three independent experiments are shown. Lin was defined  
911 as CD2<sup>-</sup>CD3<sup>-</sup>CD4<sup>-</sup>CD8<sup>-</sup>CD11b<sup>-</sup>Gr1<sup>-</sup>Ter119<sup>-</sup>CD19<sup>-</sup>NK1.1<sup>-</sup>TCR $\gamma\delta$ <sup>-</sup>. pre-thymic  
912 progenitors were defined as Lin<sup>-</sup>c-kit<sup>+</sup>CD127<sup>+</sup>/CD135<sup>+</sup>.

913 (E) TCRV $\alpha$ 2 and TCRV $\beta$ 5 expression of iT cells in PB of *Rag1*<sup>-</sup> mice 4 weeks after  
914 transplantation of OT1-*iR9*-iPSC-derived iHPC. Three representative mice from three  
915 independent experiments were analyzed.

916 (F) Tumor growth in *Rag1*<sup>-/-</sup> and OT1-iT-*Rag1*<sup>-/-</sup> mice. E.G7-OVA cells were  
917 transplanted into the groin of the *Rag1*<sup>-/-</sup> (n = 8) or OT1-iT-*Rag1*<sup>-/-</sup> mice (n = 8) by  
918 subcutaneous injection (0.2 million/mouse). The length and width of the tumors were  
919 measured every other day by a caliper, and each tumor size was calculated as length ×  
920 width (mm<sup>2</sup>). Mice with tumor size larger than 20 mm at the longest axis were  
921 euthanized for ethical consideration. \*\*\* P < 0.001 (independent t-test, two-tailed).

922 (G) Characterization of the OT1-iT cells in the tumors. The tumors were isolated at  
923 day 19 after injection and disaggregated by collagenase IV to single cell suspensions.  
924 The effector iT cells were defined as CD44<sup>+</sup>CD62L<sup>-</sup>. The memory iT cells were  
925 defined as CD44<sup>+</sup>CD62L<sup>+</sup>. IFN $\gamma$  secreted by CD8<sup>+</sup> OT1-iT cells in the tumors were  
926 intra-cellular stained. Representative plots from two tumors are shown.

927

928 SUPPLEMENTARY FIGURES AND LEGENDS

Supplementary Figure 1

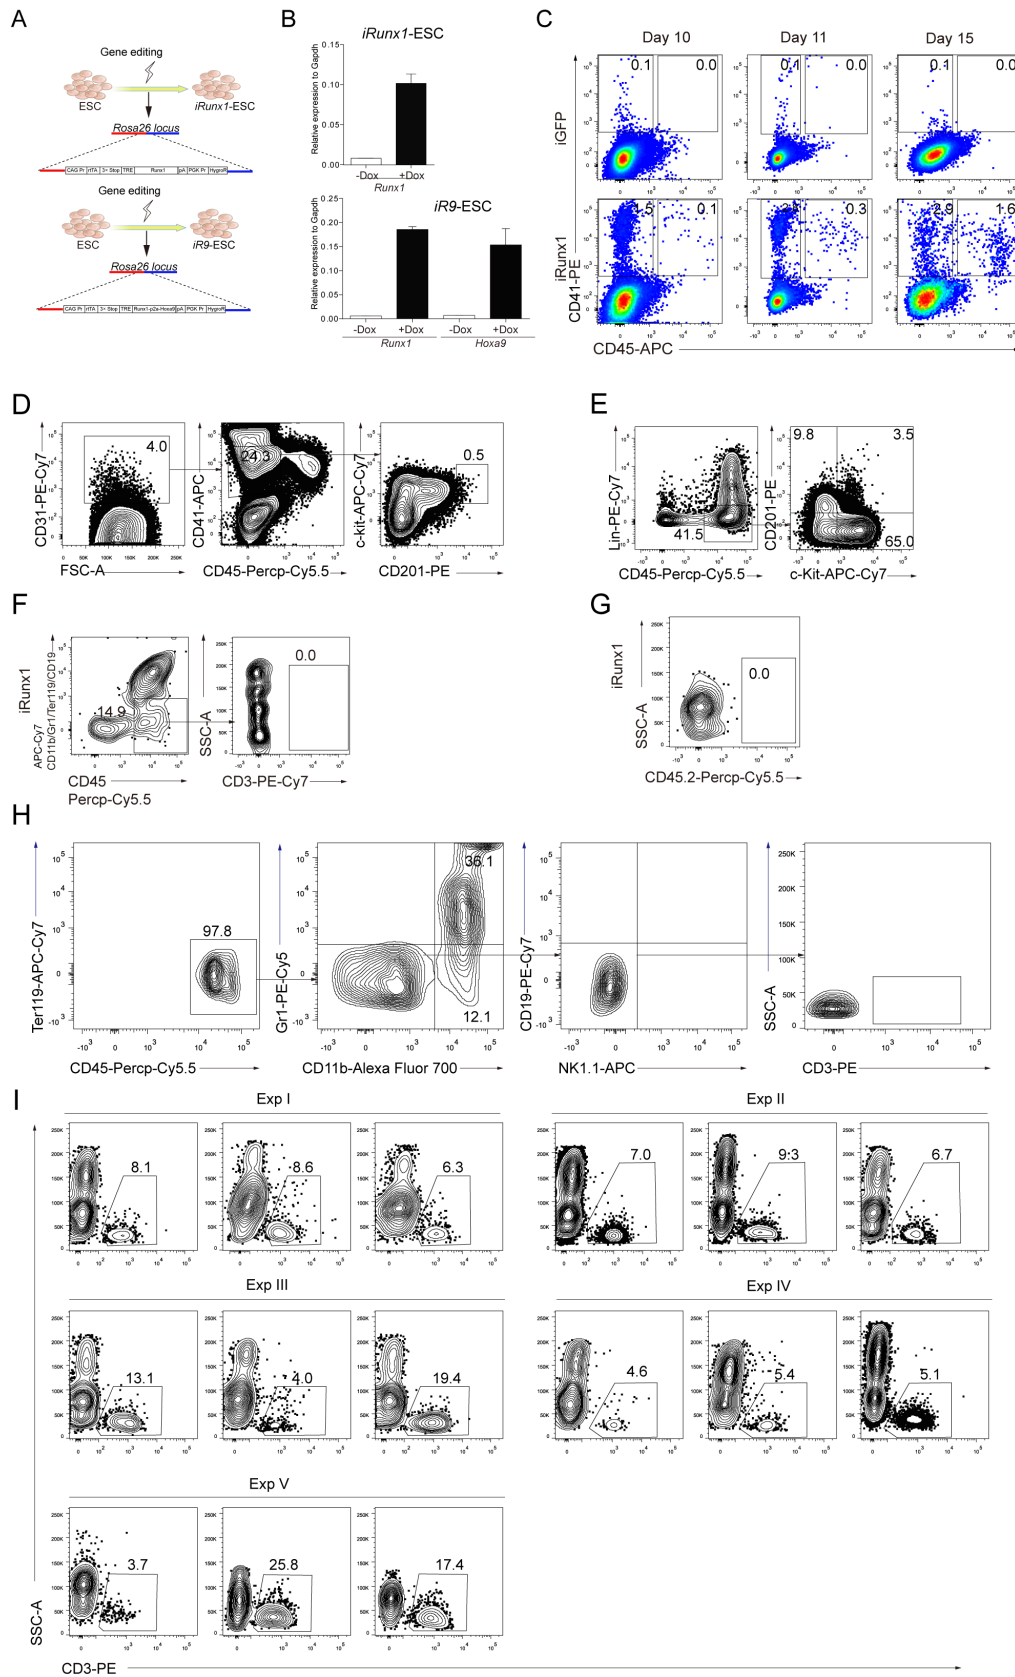

930 **Figure S1. Transcription Factor Runx1 as the Starting Candidate for iT Cell**

931 **Regeneration**

932 (A) Schematic diagram of iRunx1-ESC and iRunx1-p2a-Hoxa9 (*iR9*)-ESC construction.

933 A rtTA-TRE-Runx1-HygroR DNA cassette or rtTA-TRE-Runx1-Hoxa9-HygroR DNA

934 cassette was inserted into the *Rosa26 locus* of CD45.2<sup>+</sup> C57BL/6 mouse ESC by

935 homologous recombination. The *iRunx1*- or *iR9*-ESC clones were selected by

936 hygromycin B (150 µg/ml).

937 (B) Q-PCR analysis of the expression of Runx1 in iRunx1-ESC, and the expression of

938 Runx1 and Hoxa9 in *iR9*-ESC after doxycycline induction.

939 (C) Runx1 expression promotes endothelial to hematopoietic transition. CD41<sup>+</sup>CD45<sup>-</sup>

940 and CD41<sup>+</sup>CD45<sup>+</sup> populations of iGFP-ESC-derived and iRunx1-ESC-derived cells

941 were analyzed at day 10, day 11 and day 15 by flow cytometry.

942 (D) Sorting gates of iRunx1 ESC-derived iHEC population at day 11. Representative

943 plots from three independent experiments are shown.

944 (E) Immuno-phenotypes of hematopoietic progenitors from iRunx-ESC-derived iHEC

945 after ten-day maturation. Representative plots from four independent experiments are

946 shown. Lin was defined as CD2<sup>-</sup>CD3<sup>-</sup>CD4<sup>-</sup>CD8<sup>-</sup>Gr1<sup>-</sup>Ter119<sup>-</sup>CD19<sup>-</sup>NK1.1<sup>-</sup>TCRγδ<sup>-</sup>.

947 Hematopoietic progenitors were defined as CD45<sup>+</sup>Lin<sup>-</sup>c-kit<sup>+</sup>CD201<sup>+</sup>.

948 (F) The failure of iT cell induction from iRunx1-ESC-derived iHEC.

949 (G) iRunx1-ESC-derived iHEC failed to contribute any hematopoietic in B-NDG mice

950 four weeks after transplantation. One million iHEC-derived hematopoietic cells were

951 transplanted into individual B-NDG mice (CD45.1<sup>+</sup>) irradiated by X-ray (2.25 Gy). One

952 representative mouse was analyzed.

953 (H) Lineage characterization of bulk cells collected at day 10 after coculture of *iR9*-  
 954 ESC-derived iHEC and OP9-DL1. One representative plot from three independent  
 955 experiments are shown. Myeloid cells were defined as CD45<sup>+</sup>CD11b<sup>+</sup>.

956 (I) Flow cytometry analysis of pluripotent stem cell-derived T cells in PB of iHPC  
 957 recipients. Plots from three mice of each independent experiment (Exp I, II, III, IV, V)  
 958 are shown.

### Supplementary Figure 2

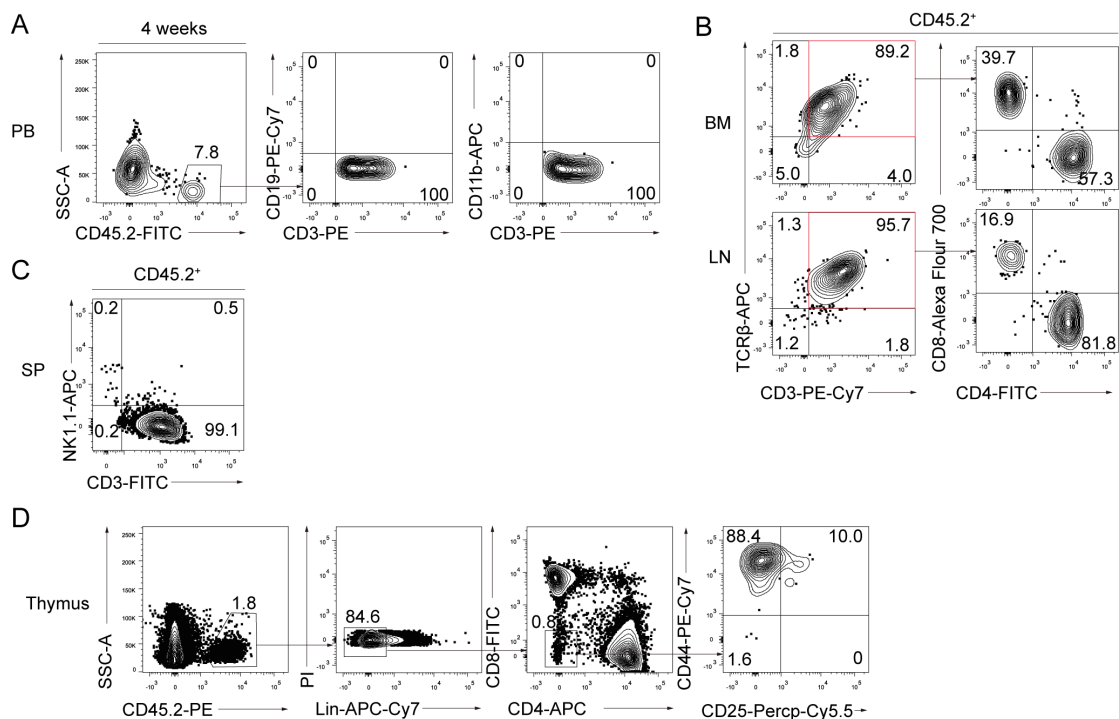

959

### 960 **Figure S2. Day-17 iHPC Reconstitutes T Lymphopoiesis *in vivo***

961 (A) Induced T cells (iT) in PB of B-NDG mice were analyzed by flow cytometry 4  
 962 weeks after transplantation. One million iHPC from Day 17 in the presence of OP9-  
 963 DL1 feeder cells were transplanted into individual B-NDG mice (CD45.1<sup>+</sup>) irradiated  
 964 by X-ray (2.25 Gy). One representative mouse from three independent experiments  
 965 were analyzed.



966 (B) Flow cytometry analysis of the mature iT cells in bone marrow (BM) and lymph  
967 node (LN) of B-NDG mice transplanted with iHPC. Each B-NDG mouse was  
968 transplanted with one million iHPC collected at day 6 in the presence of OP9-DL1  
969 feeder cells. Representative mouse was sacrificed and analyzed 5 weeks after  
970 transplantation. Data from one mouse are shown.

971 (C) Flow cytometry analysis of induced NK (iNK) cells and induced T cells (iT) in  
972 spleen (SP) of B-NDG mice transplanted with iHPC. Each B-NDG mouse was  
973 transplanted with one million iHPC collected from day-6 co-culture with OP9-DL1.  
974 Representative mouse was sacrificed and analyzed 5 weeks after transplantation. iNK  
975 cells were defined as  $CD45.2^+NK1.1^+CD3^-$ . Data from one representative mouse were  
976 shown.

977 (D) Flow cytometry analysis of induced double-negative T lymphocytes (iDN) cells in  
978 the thymus of B-NDG mice transplanted with iHPC. Each B-NDG mouse was  
979 transplanted with one million iHPC after six-day co-culture with OP9-DL1.  
980 Representative mouse was sacrificed and analyzed 5 weeks after transplantation. Data  
981 from one representative mouse from three independent experiments are shown. Lin was  
982 defined as  $Ter119^-CD11b^-Gr1^-CD19^-B220^-NK1.1^-TCR\gamma\delta^-$ .

Supplementary Figure 3

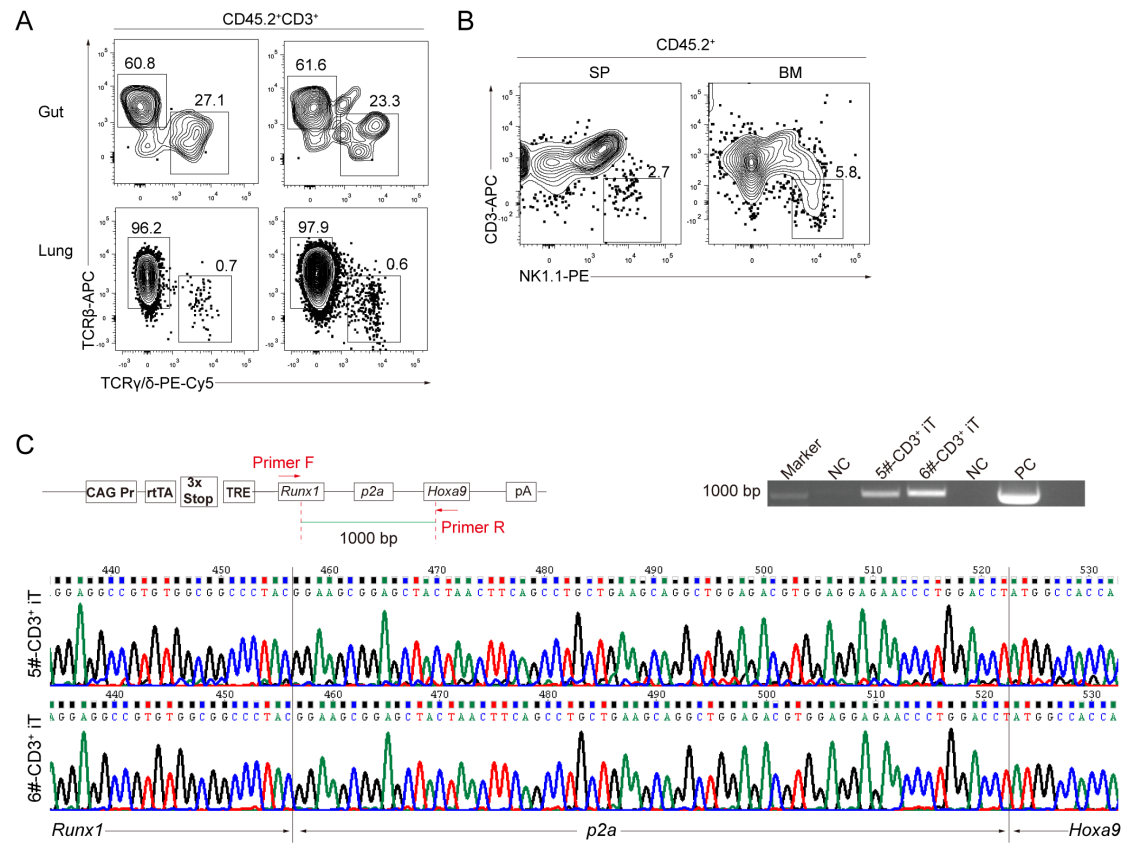

984 **Figure S3. Characterization of iHEC-derived iT and iNK Cells in B-NDG**  
 985 **Recipients**

986 (A) Flow cytometry analysis of  $\gamma\delta$ -iT and  $\beta$ -iT cells in the gut and lung tissues of B-  
 987 NDG mice transplanted with ESC-derived hematopoietic cells. Each B-NDG mouse  
 988 was transplanted with one million iHEC-derived hematopoietic cells and fed with  
 989 Doxycycline (1 mg/ml) for sustaining 6 weeks. Representative mouse was sacrificed  
 990 and analyzed at 6 weeks after transplantation. Data from two representative mice are  
 991 shown.

992 (B) Measurement of induced NK cells in spleen (SP) and bone marrow (BM) of B-  
 993 NDG mice transplanted with iHPC. Pluripotent stem cell-derived NK cells were  
 994 defined as CD45.2<sup>+</sup>NK1.1<sup>+</sup>CD3<sup>-</sup>. Plots from one representative B-NDG mouse six

995 weeks after transplantation of iHPC are shown.

996 (C) Genotype sequencing of the Runx1-p2a-Hoxa9 element of the sorted iT cells.

997 Genomic PCR were performed using primer pairs flanking the inserted Runx1-p2a-

998 Hoxa9 sequence element, and genome template (200 ng) of 20,000 sorted iT cells from

999 the spleen of iT-B-NDG mice. The sequencing results were visualized by chromas

1000 software. PCR products of iT cells from two iT-B-NDG mice were sequenced and

1001 shown.

#### Supplementary Figure 4

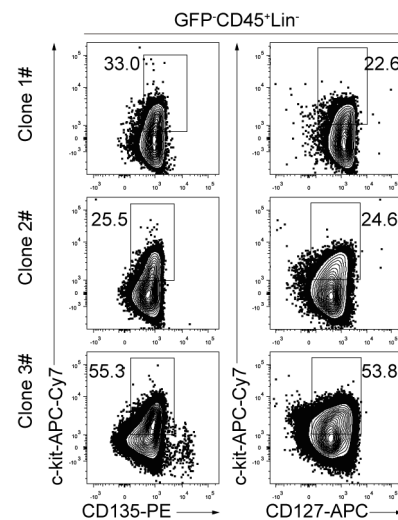

1002

#### 1003 **Figure S4. Single iHEC from *iR9*-ESC Gives Rise to iHPC *in vitro***

1004 Immuno-phenotypes of pre-thymic progenitors in induced hematopoietic progenitor

1005 cells from *iR9*-PSC-derived iHEC after ten-day maturation. Three representative clones

1006 from two independent experiments were analyzed. Lin was defined as CD2<sup>-</sup>CD3<sup>-</sup>CD4<sup>-</sup>

1007 CD8<sup>-</sup>CD11b<sup>-</sup>Gr1<sup>-</sup>Ter119<sup>-</sup>CD19<sup>-</sup>NK1.1<sup>-</sup>TCRγδ<sup>-</sup>. pre-thymic progenitors were defined

1008 as Lin<sup>-</sup>c-kit<sup>+</sup>CD127<sup>+</sup>/CD135<sup>+</sup>.

Supplementary Figure 5

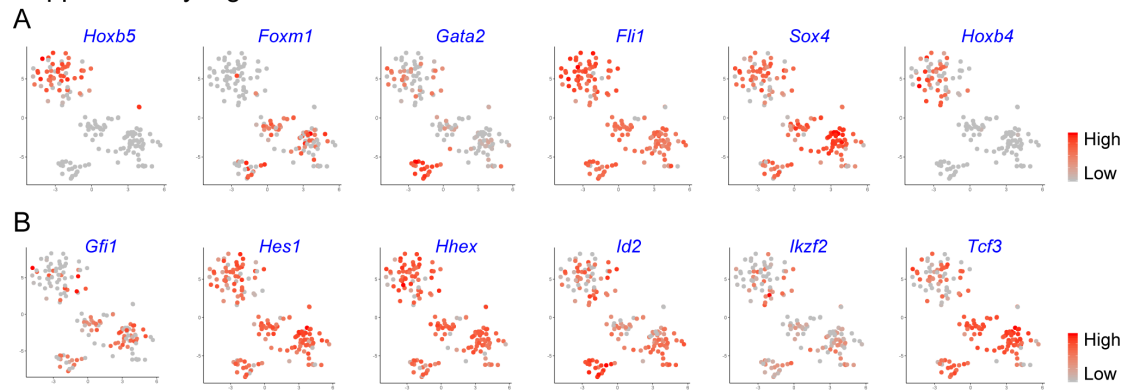

1009

1010 **Figure S5. Time-course Expression Patterns of Hematopoietic and**

1011 **Lymphopoietic Development-related Transcription Factors in Single iHEC and**

1012 **iHPC Derived from *iR9*-ESC**

1013 (A) tSNE analysis of the expression pattern of selected hematopoietic-related

1014 transcription factors in iHEC and iHPC.

1015 (B) tSNE analysis of the expression pattern of selected T cell development-related

1016 transcription factors in iHEC and iHPC at Day14, Day17, and Day21.

Supplementary Figure 6

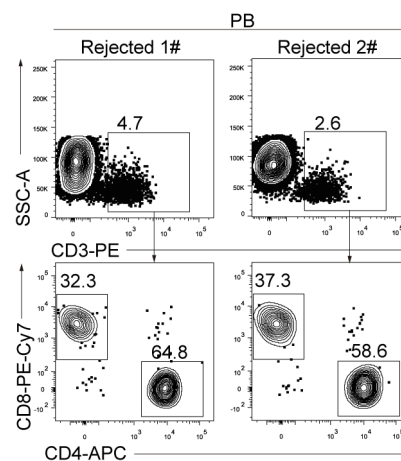

1017

1018 **Figure S6. iT Cells in PB of iT-*Rag1*<sup>-/-</sup> Mice 30 Days after 1<sup>st</sup> Allogeneic Rejection**

1019 Flow cytometry analysis of the iT cells in peripheral blood (PB) of iT transferred *Rag1*<sup>-/-</sup>

1020 <sup>-/-</sup> recipients 30 days after 1<sup>st</sup> grafted allogeneic skin rejection. Plots of two

1021 representative mice are shown.

### Supplementary Figure 7

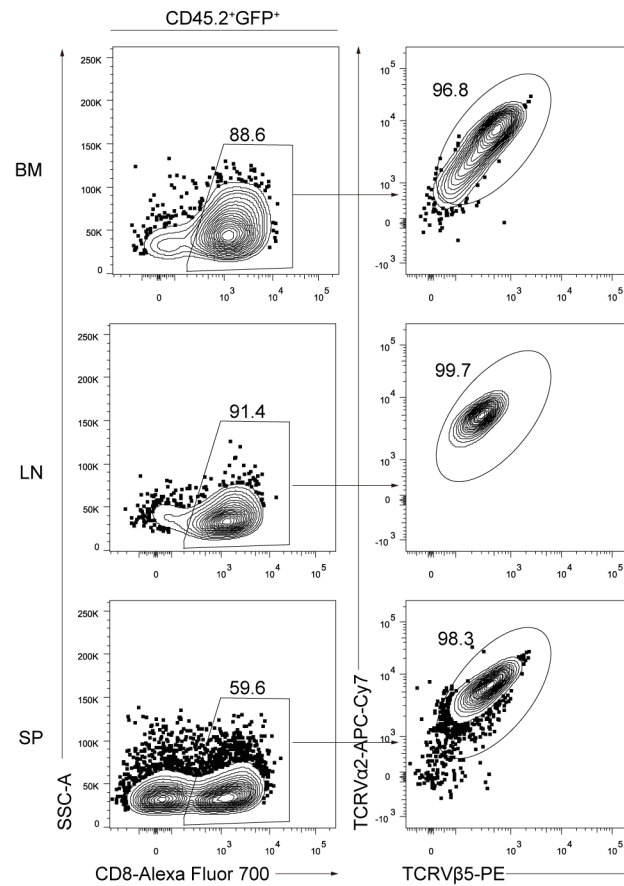

1022

1023 **Figure S7. Distributions of OT1-iT Cells in the BM, LN and SP of OT1-iT *Rag1*<sup>-/-</sup>**

1024 **Mice 19 Days after E.G7-OVA Tumor Cell Injection**

1025 *Rag1*<sup>-/-</sup> mice were transplanted with iHPC (3 million/mouse) 4 weeks before E.G7-OVA

1026 tumor cell injection. OT1-iT *Rag1*<sup>-/-</sup> mice carrying tumors were sacrificed 19 days after

1027 E.G7-OVA tumor cell injection. TCRVα2 and TCRVβ5 on CD8<sup>+</sup> iT cells were analyzed

1028 in the bone marrow (BM), lymph node (LN) and spleen (SP) of the OT1-iT *Rag1*<sup>-/-</sup> mice.

1029 Plots of one representative mouse are shown.

Supplementary Figure 8

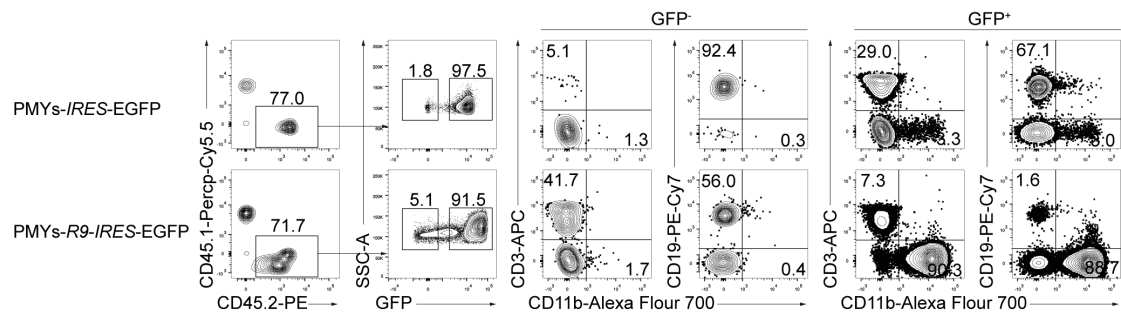

**Figure S8. Overexpression of Tandem *Runx1-p2a-Hoxa9* in Natural HSC Leads to Myeloid- Instead of Lymphoid-biased Hematopoietic**

Lineage contribution of HSC transduced with PMYs-IRES-EGFP or PMYs-R9-IRES-EGFP retrovirus. E14.5 fetal liver HSPCs (FL-HSPCs) were enriched by Lineage (CD2/3/4/8/B220/CD19/Ter119/Gr1) cell deletion and were infected with PMYs-IRES-EGFP or PMYs-R9-IRES-EGFP retrovirus. Half million HSPC transduced with the related viruses were transplanted into the individual CD45.1 C57BL/6 mice irradiated by X-ray (6.5 Gy). Peripheral blood cells were analyzed 16 weeks after transplantation cells.
