1 **Guiding T lymphopoiesis from pluripotent stem cells by defined**

2 **transcription factors**

3 Rongqun Guo<sup>1,2,3,5,6,10</sup>, Fangxiao Hu<sup>1,2,5,6,10</sup>, Qitong Weng<sup>1,2,3,5,6,10</sup>, Cui Lv<sup>1,2,5,6</sup>,  
4 Hongling Wu<sup>1,2,5,6</sup>, Lijuan Liu<sup>1,2,4,5,6</sup>, Zongcheng Li<sup>7</sup>, Yang Zeng<sup>7</sup>, Zhijie Bai<sup>7</sup>,  
5 Mengyun Zhang<sup>1,2,4,5,6</sup>, Yuting Liu<sup>1,2,5,6</sup>, Xiaofei Liu<sup>1,2,4,5,6</sup>, Chengxiang Xia<sup>1,2,3,5,6</sup>,  
6 Tongjie Wang<sup>1,2,5,6</sup>, Peiqing Zhou<sup>1,2,3,5,6</sup>, Kaitao Wang<sup>1,2,4,5,6</sup>, Yong Dong<sup>1,2,5,6</sup>, Yuxuan  
7 Luo<sup>8</sup>, Xiangzhong Zhang<sup>8</sup>, Yuxian Guan<sup>1,2,5,6</sup>, Yang Geng<sup>1,2,4,5,6</sup>, Juan Du<sup>1,2,3,5,6</sup>,  
8 Yangqiu Li<sup>9</sup>, Yu Lan<sup>9</sup>, Jiekai Chen<sup>1,2,3,4,5,6</sup>, Bing Liu<sup>7\*</sup>, Jinyong Wang<sup>1,2,3,4,5,6\*</sup>

9 <sup>1</sup>State Key Laboratory of Experimental Hematology, CAS Key Laboratory of  
10 Regenerative Biology, Guangzhou Institutes of Biomedicine and Health, Chinese  
11 Academy of Sciences, Guangzhou, China.

12 <sup>2</sup>Guangzhou Regenerative Medicine and Health-Guangdong Laboratory  
13 (GRMH-GDL), Guangzhou, China.

14 <sup>3</sup>University of Chinese Academy of Sciences, Beijing, China.

15 <sup>4</sup>Joint School of Life Sciences, Guangzhou Institutes of Biomedicine and Health,  
16 Guangzhou Medical University, Guangzhou, China.

17 <sup>5</sup>Guangdong Provincial Key Laboratory of Stem cell and Regenerative Medicine,  
18 Guangzhou Institutes of Biomedicine and Health, Chinese Academy of Sciences,  
19 Guangzhou, China.

20 <sup>6</sup>Institute for Stem Cell and Regeneration, Chinese Academy of Sciences, Beijing,  
21 China.

22 <sup>7</sup>State Key Laboratory of Proteomics, Translational Medicine Center of Stem Cells,

23 Fifth Medical Center, General Hospital of PLA, Beijing, China.

24 <sup>8</sup>Department of Hematology, the Third Affiliated Hospital of Sun Yat-Sen University,  
25 Guangzhou, China.

26 <sup>9</sup>Key Laboratory for Regenerative Medicine of Ministry of Education, Institute of  
27 Hematology, School of Medicine, Jinan University, Guangzhou, China.

28 <sup>10</sup>These authors contributed equally.

29 \*e-mail: [wang\\_jinyong@gibh.ac.cn](mailto:wang_jinyong@gibh.ac.cn); [bingliu17@yahoo.com](mailto:bingliu17@yahoo.com)

### 30 **ABSTRACT**

31 Achievement of immunocompetent and therapeutic T lymphopoiesis from pluripotent  
32 stem cells is a central aim in T cell regenerative medicine. To date, preferentially  
33 regenerating T lymphopoiesis *in vivo* from pluripotent stem cells (PSC) remains a  
34 practical challenge. Here we documented that synergistic and transient expression of  
35 Runx1 and Hoxa9 restricted in the time window of endothelial to hematopoietic  
36 transition and hematopoietic maturation stages induced *in vitro* from PSC (iR9-PSC)  
37 preferentially generated engraftable hematopoietic progenitors capable of homing to  
38 thymus and developing into mature T (iT) cells in primary and secondary  
39 immunodeficient recipients. Single-cell transcriptome and functional analyses  
40 illustrated the cellular trajectory of T lineage induction from PSC, unveiling the  
41 T-lineage specification determined at as early as hemogenic endothelial cell stage and  
42 identifying the *bona fide* pre-thymic progenitors. The iT cells distributed normally in  
43 central and peripheral lymphoid organs and exhibited abundant TCR $\alpha\beta$  repertoire.  
44 The regenerative T lymphopoiesis rescued the immune-surveillance ability in



45 immunodeficient mice. Furthermore, gene-edited iR9-PSC produced tumor-specific-T  
46 cells *in vivo* that effectively eradicated tumor cells. This study provides insight into  
47 universal generation of functional and therapeutic T lymphopoiesis from the unlimited  
48 and editable PSC source.

49 **Key Words:** Pluripotent stem cells, transcription factors, *Runx1*, *Hoxa9*, T  
50 lymphopoiesis

## 51 **INTRODUCTION**

52 A prominent method to generate T cells is an *in vitro* system via co-culture of either  
53 mouse or human hematopoietic stem/progenitors (HSPC) with stromal cell lines  
54 expressing the Notch ligand, such as OP9-DL1/DL4 or 3D-based MS5-hDLL1/4<sup>1-3</sup>.  
55 Despite the great contribution of this approach to studying T cell development *in vitro*,  
56 phenotypic T cells produced by this approach face severe immunocompetency  
57 problems *in vivo* after engraftment, due to the inadequate *in vitro* recapitulation of  
58 natural thymus microenvironment. Natural mouse Sca1<sup>+</sup>cKit<sup>+</sup> and human CD34<sup>+</sup>  
59 blood progenitor cells can be induced into CD7<sup>+</sup> pre-thymic cells *in vitro*, which  
60 successfully colonize thymi and mature into immunocompetent T cells *in vivo*<sup>4,5</sup>.  
61 However, this *in vitro* plus *in vivo* two-step approach never succeeded in generating  
62 induced T lymphopoiesis when starting from pluripotent stem cells (PSC), as induced  
63 T cell progenitors from PSC showed intrinsic thymus-homing defect *in vivo*<sup>6</sup>.  
64 Another prevailing concept for generating functional T lymphopoiesis from PSC is  
65 via induction of hematopoietic stem cell (HSC)-like intermediates followed by *in vivo*  
66 multi-lineage hematopoiesis, including T cells<sup>7-10</sup>. However, generating robust *bona*

67 *vide* induced-HSC (iHSC) from PSC remains inefficient<sup>11,12</sup> and whether this  
68 approach can generate therapeutic tumor-killing T cells is unknown. Recently, *Hoxb5*  
69 is shown to convert natural B cells into functional T cells *in vivo*<sup>13</sup>, providing an  
70 alternative method to shorten the immune system recovery gap in conventional HSC  
71 transplantation. Nonetheless, a solid and universal approach, capable of generating  
72 immunocompetent and therapeutic T lymphopoiesis from the unlimited and  
73 gene-editable PSC, is still lacking.

74       Accumulated developmental evidence shows that blood progenitors prior to the  
75 occurrence of definitive HSC, also possess T cell lineage differentiation potential<sup>14-17</sup>.  
76 Despite the abundant knowledge of the pivotal transcription factors regulating T cell  
77 development from HSC derivatives<sup>18</sup>, intrinsic determinants of T cell lineage  
78 potential in the HSC-independent hematopoietic progenitors at the pre-liver and  
79 pre-thymus stages remain elusive. Thus, identifying such crucial T lineage-potential  
80 determinants might help to establish a solid protocol for efficiently reconstituting T  
81 lymphopoiesis from PSC.

82       In this study by a unbiased *in vivo* functional screening approach, we identified  
83 that the coordinated and transient expression of exogenous *Runx1* and *Hoxa9* at the  
84 early time window from endothelial to hematopoietic transition stage to hematopoietic  
85 progenitor maturation stage induced *in vitro* from PSC, produced a type of induced  
86 hematopoietic progenitor cells (iHPC) with thymus-homing features, which was  
87 engraftable and gave rise to induced T cells (iT cells) with abundant TCR $\alpha\beta$  repertoire  
88 in immune deficient mice. Physiologically, the iT cells successfully rescued immune

89 surveillance function in immune deficient mice. Therapeutically, these iT cells  
90 possessed anti-tumor activities *in vivo* when engineered to carry tumor antigen  
91 specific TCR at PSC stage. For the first time, we establish a novel approach of  
92 preferentially generating functional and therapeutic T lymphopoiesis *in vivo* from  
93 PSC, which technically creates a link between the unlimited and editable PSC source  
94 and T cell-based immunotherapy for translational purpose.

95

96 **RESULTS**

97 **Reconstitution of T lymphopoiesis *in vivo* from inducible**  
98 ***Runx1-p2a-Hoxa9*-embryonic stem cells**

99 We hypothesized that the lymphogenic potential is determined by intrinsic  
100 determinants at putative endothelial precursor cell stage prior to and independent of  
101 HSC formation. Therefore, enforced expression of these master determinants might  
102 direct lymphoid differentiation from PSC. Since *Runx1* is pivotal for endothelial to  
103 hematopoietic transition (EHT)<sup>19-21</sup>, definitive hematopoietic development<sup>22-24</sup> and T  
104 cell development<sup>18</sup>, we started from evaluating the potential effect of *Runx1* in  
105 lymphogenic commitment from PSC. To avoid the expression variations introduced  
106 by viral delivery systems, we inserted the inducible expression cassette of *Runx1* into  
107 the *Rosa26 locus* of embryonic stem cells (*iRunx1*-ESC, C57BL/6 background) by  
108 homologous recombination (Supplementary information, Fig. S1a), which resulted in  
109 the conditional expression of exogenous *Runx1* in the presence of doxycycline  
110 (Supplementary information, Fig. S1b). We used AFT024-(mSCF/mIL3/mIL6/hFlt3L)  
111 cell line-cultured supernatants as conditioned medium (CM) for the *in vitro* induction  
112 of induced hemogenic endothelial progenitors (iHEC) and subsequent iHPC, as  
113 AFT024 CM is beneficial for the generation of induced HPC *in vitro*<sup>25</sup>. To  
114 functionally assess the T lymphopoiesis potential of iHPC, we transplanted the bulk  
115 cells containing abundant iHPC (referred as iHPC thereafter) into irradiated (2.25 Gy)  
116 B-NDG recipients (iHPC recipients) and used the occurrence of CD3<sup>+</sup> cells in  
117 peripheral blood (PB) as a positive readout of induced T lymphopoiesis *in vivo* (Fig.

118 1a). Based on a modified protocol for HEC induction from PSC <sup>26</sup>, we successfully  
119 generated iHEC and hematopoietic progenitor derivatives (Supplementary  
120 information, Figs. S1c-e). However, the *iRunx1*-ESC derivatives eventually failed to  
121 generate T cells on the conditions of either *in vitro* OP9-DL1 co-culture system  
122 (Supplementary information, Fig. S1f) or *in vivo* transplantation setting  
123 (Supplementary information, Fig. S1g). We speculated that the other transcription  
124 factors essential for T lineage generation might be absent in the *iRunx1*-ESC  
125 derivatives. To identify these absent factors, we sorted the single iHEC from  
126 *iRunx1*-ESC and performed single-cell RNA-Seq. In comparison with E11  
127 T1-pre-HSC (CD31<sup>+</sup>CD41<sup>low</sup>CD45<sup>c-kit</sup>CD201<sup>high</sup>), we identified eight  
128 hematopoietic-essential transcription factors, *Hoxa5* <sup>8</sup>, *Hoxa7* <sup>27</sup>, *Hoxa9* <sup>28</sup>, *Hoxa10* <sup>29</sup>,  
129 *Hlf* <sup>30</sup>, *Ikzf1* <sup>31</sup>, *Nkx2-3* <sup>32</sup>, and *Setbp1* <sup>33</sup>, which were barely expressed in  
130 *iRunx1*-ES-derived iHEC but abundantly expressed in E11 T1-pre-HSC (Fig. 1b).  
131 Consistent with the previous reports that human PSC-derived HEC lacks expression  
132 of HOXA family <sup>8,34</sup>. We further used an “*iRunx1+Xi*” tandem-factor-knock-in  
133 strategy to perform unbiased screening of the potential combinatory effects of these  
134 factors with Runx1 in lymphoid lineage induction. Following the same induction  
135 protocol, we identified that the inducible expression of exogenous *Runx1* and *Hoxa9*  
136 from day 6 to day 11 during the induction program led to the production of robust  
137 iHEC phenotypically resembling embryonic pre-HSC  
138 (CD31<sup>+</sup>CD41<sup>low</sup>CD45<sup>c-kit</sup>CD201<sup>high</sup>) (Fig. 1c) <sup>35</sup>. Notably, CD201<sup>+/high</sup> expression  
139 can enrich hemogenic precursors with both definitive HPC and HSC potential from as

140 early as E9.5 embryos<sup>36</sup>. After co-culture of these iHEC with OP9-DL1 feeder line  
141 (GFP<sup>+</sup>) in the presence of CM and doxycycline (1 µg/ml), robust iHPC occurred at  
142 day 21, including phenotypic pre-thymic progenitors (Lin<sup>-</sup>c-kit<sup>+</sup>CD127<sup>+</sup>/CD135<sup>+</sup>)<sup>18</sup>  
143 (Fig. 1d), and CD11b<sup>+</sup>/Gr1<sup>+</sup> myeloid cells, but no CD3<sup>+</sup> T cells (Supplementary  
144 information, Fig. S1h). To further assess the engraftment potential of these iHPC, we  
145 transplanted 0.5-1 million *iR9*-ESC-derived iHPC (day-21) into irradiated (2.25 Gy)  
146 B-NDG mice (8-week-old, CD45.1 strain) in the absence of doxycycline. Four weeks  
147 after transplantation, we observed donor-derived CD45.2<sup>+</sup> CD3<sup>+</sup> T cells, but no  
148 CD45.2<sup>+</sup>CD19<sup>+</sup> B cells and no CD45.2<sup>+</sup>CD11b<sup>+</sup> myeloid cells, in the PB of B-NDG  
149 mice transplanted with the iHPC (Fig. 1e). Five independent experiments indicated  
150 that the *iR9*-ESC-derived iHPC gave rise to CD3<sup>+</sup> iT cells in over 80% B-NDG  
151 recipients (iT-B-NDG mice, 32/40) (Fig. 1f; Supplementary information, Fig. S1i). In  
152 addition, the day-17 iHPC also reconstituted T lymphopoiesis in B-NDG recipients  
153 (Supplementary information, Figs. S2a-d). Thus, we established a novel approach of  
154 preferentially generating iT cells from gene-edited PSC by defined transcription factor  
155 *Runx1* and *Hoxa9*.

### 156 **The iT cells show features of multi-organ distributions and abundant TCR** 157 **diversity**

158 We further analyzed the tissue distributions and immunophenotypes of the  
159 regenerated T lymphocytes in iT-B-NDG mice. Mature CD4SP and CD8SP iT cells  
160 were detected in the spleen, lymph node and PB of iT-B-NDG mice, the majority of  
161 which were TCRβ positive (Fig. 2a). In addition, γδ iT cells were also detected in gut

162 and lung tissues of iT-B-NDG mice (Supplementary information, Fig. S3a). Induced  
163 NK cells (iNK, CD45.2<sup>+</sup>NK1.1<sup>+</sup>CD3<sup>-</sup>) were also detected in the spleen and bone  
164 marrow of iT-B-NDG mice (Supplementary information, Fig. S3b). The thymus of  
165 iT-B-NDG mice also contained induced CD4SP (iCD4SP), induced double positive  
166 (iDP, CD45.2<sup>+</sup>CD4<sup>+</sup>CD8<sup>+</sup>), induced CD8SP (iCD8SP), and induced double negative  
167 (iDN, CD45.2<sup>+</sup>Lin<sup>-</sup>CD4<sup>-</sup>CD8<sup>-</sup>) cells when examined at week-4 and week-5 after  
168 transplantation of iHPC. Interestingly, the majority of the iDN cells were at iDN1  
169 (CD45.2<sup>+</sup>Lin<sup>-</sup>CD4<sup>-</sup>CD8<sup>-</sup>CD44<sup>+</sup>CD25<sup>-</sup>) phase at week-4, and at iDN2  
170 (CD45.2<sup>+</sup>Lin<sup>-</sup>CD4<sup>-</sup>CD8<sup>-</sup>CD44<sup>+</sup>CD25<sup>+</sup>)/iDN3 (CD45.2<sup>+</sup>Lin<sup>-</sup>CD4<sup>-</sup>CD8<sup>-</sup>CD44<sup>-</sup>CD25<sup>+</sup>)  
171 phases at week-5 (Fig. 2b). Besides the iT cells and induced NK1.1<sup>+</sup>CD3<sup>-</sup> NK (iNK)  
172 cells detected in bone marrow, we also observed *iR9*-ES-derived Lin<sup>-</sup>Sca1<sup>+</sup>cKit<sup>+</sup>  
173 (iLSK) progenitor cells (Fig. 2c). To assess whether the iLSK cells can contribute to T  
174 lymphopoiesis, we sorted this population from primary iHPC recipients (week-6) and  
175 performed secondary transplantation. Six weeks after transplantation, iT cells  
176 appeared in PB, BM, and SP of the B-NDG recipients (Fig. 2d). Of note, despite  
177 *iR9*-ES-derived myeloid lineage cells were barely detected *in vivo*, the iLSK cells  
178 indeed gave rise to very limited myeloid colonies in CFU assay (data not shown). To  
179 further characterize the iT cells at transcriptome level, we sorted 1,000 cell aliquots of  
180 the CD4SP iT cells and CD8SP iT cells from the spleens of iT-B-NDG mice for  
181 RNA-Seq analysis. Our data indicated that the CD4SP iT cells resembled natural  
182 CD4SP T cells, and the CD8SP iT cells resembled natural CD8SP T cells, both of  
183 which expressed surface marker-encoding genes *Cd2*, *Fas*, *Cd3e*, *Cxcr3*, *Cd28*, *Cd27*,

184 *Cd7*, *Cd5*, and *Il7r* (Fig. 2e). Of note, the CD4SP iT cells, but not CD8SP iT cells,  
185 expressed the *ThPOK* (T helper inducing POK factor, also known as *Zbtb7b*), a  
186 master regulator in regulating CD4 vs. CD8 T cell lineage commitment<sup>37</sup>. In addition,  
187 the iT cells also expressed T cell identity genes and key regulators *Tcf7*<sup>38</sup>, *Tox*<sup>39</sup>, *Lck*  
188<sup>40</sup>, *Gata3*<sup>41</sup>, *Bcl11b*<sup>42</sup>, *Ikzf2*<sup>43</sup>, and *Rora*<sup>44</sup> (Fig. 2f). In comparison with natural T  
189 cell counterparts, the iT cells also showed features of discrepantly expressed genes (a  
190 difference in expression of over two-fold; adjusted P value < 0.05 (DESeq2 R  
191 package)) (Supplementary information, Table S1), including weaker expression of  
192 *Tcf7*. Genomic PCR sequencing using primer pairs flanking the *Runx1-p2a-Hoxa9*  
193 element further confirmed that the reconstituted iT cells *in vivo* were of *iR9*-PSC  
194 origin, which carried the inserted *Runx1-p2a-Hoxa9* (Supplementary information, Fig.  
195 S3c). To further assess the diversities of the TCR $\alpha\beta$  clonotypes of the iT cells, we  
196 performed TCR deep sequencing using the sorted naïve CD4SP  
197 (CD45.2<sup>+</sup>CD4<sup>+</sup>CD62L<sup>+</sup>CD44<sup>-</sup>) and CD8SP iT cells (CD45.2<sup>+</sup>CD8<sup>+</sup>CD62L<sup>+</sup>CD44<sup>-</sup>)  
198 from the spleens and thymi of iT-B-NDG mice at week-6 after transplantation of  
199 iHPC. The aliquots of 15,000 sorted naïve CD4SP and CD8SP iT cells were used as  
200 cell inputs for TCR $\alpha\beta$  sequencing at the transcription level. TCR $\alpha\beta$  clonotype  
201 profiling using MiXCR<sup>45</sup> captured abundant diversities of TCR $\alpha\beta$  sequences among  
202 the sorted naïve iT cells isolated from the thymi (Figs. 2g, h) and spleens (Figs. 2i, j)  
203 of the iT-B-NDG mice. Collectively, these data indicate that the *iR9*-ESC-derived  
204 iHPC reconstitute T lymphopoiesis *in vivo* resembling natural T cell development.

205 **Single iHEC efficiently give rise to iT cells both *in vitro* and *in vivo***



206 To further investigate the efficiency of iHEC differentiating into iT cells, we sorted  
207 single iHEC into individual wells (24 well-plates) pre-seeded with OP9-DL1 feeder  
208 cells (Fig. 3a). After ten-day co-culture, over 15 percent individual iHEC formed  
209 blood colonies (76/384 wells) (Fig. 3b), which contained abundant pre-thymic  
210 progenitors ( $\text{Lin}^- \text{c-kit}^+ \text{CD127}^+ / \text{CD135}^+$ ) (Supplementary information, Fig. S4). After  
211 co-culture with OP9-DL1 feeder line in the presence of hFlt3L and hIL7, these  
212 iHEC-formed blood colonies (30/30) further differentiated into  $\text{CD3}^+$  iT cells *in vitro*  
213 (Fig. 3b), including a major population of  $\text{TCR}\gamma\delta$  iT cells, and a small proportion of  
214  $\text{CD8}^+ \text{TCR}\beta$  iT cells (Fig. 3c). To assess the T lymphopoiesis potential of these  
215 single-iHEC-derived iHPC, we further collected the iHPC from each colony at day 21  
216 and transplanted them into individual B-NDG mice. Four weeks after transplantation,  
217  $\text{CD11b}^- \text{CD19}^- \text{CD3}^+$  iT cells were detected in approximately 28% (7/25) B-NDG mice  
218 transplanted with the cell derivatives from individual iHEC-formed clones (Figs. 3b,  
219 d). Collectively, the *iR9*-ESC-derived iHEC robustly gave rise to T cells at the single  
220 cell level.

### 221 **Cellular trajectory from iHEC to pre-thymic progenitors**

222 To characterize the single iHEC at transcriptome level, we performed single-cell  
223 RNA-Seq using the sorted iHEC and compared them with natural single E11  
224 endothelial cells (EC), Type-I pre-HSC, Type-II pre-HSC, E12 HSC, E14 HSC, and  
225 adult HSC described previously<sup>35</sup>. Principle component analysis indicated that the  
226 iHEC localized between embryonic EC and pre-HSC (Figs. 4a, b). A large proportion  
227 of iHEC expressed artery or vein-related genes, suggestive of their EC-like nature

228 (Fig. 4c). Most iHEC expressed endothelial surface marker-encoding genes *Cdh5*  
229 (coding VE-Cadherin, 70/70) and *Esam* (57/70), which were continuously expressed  
230 from embryonic EC to pre-HSC at a relatively high level. On the other hand, partial  
231 iHEC expressed *Procr* (coding CD201, 32/70), *Cd47* (33/70) and *Cd63* (44/70),  
232 which were upregulated from EC to pre-HSC (Fig. 4d). The expression of  
233 transcription factors related to endothelial and hematopoietic development further  
234 revealed that the iHEC shared a similar feature with embryonic EC and pre-HSC.  
235 Majority of the iHEC expressed *Fli1* (66/70), *Erg* (42/70), *Lmo2* (49/70), *Mycn*  
236 (65/70), and *Sox7* (38/70). Specifically, a small proportion of iHEC expressed *Bcl11a*  
237 (11/70) and *Hoxb5* (24/70). All these transcription factors are pivotal for lymphoid  
238 lineage development (Fig. 4e). Thus, the molecular features of the iHEC show  
239 similarities with embryonic EC and pre-HSC.

240 To further characterize the iHPC during the hematopoietic maturation process, we  
241 sorted the single iHPC from day-14, day-17, day-21 cell products derived from  
242 *iR9*-ES and performed single-cell RNA-Seq. To visualize the time course data of  
243 iHPC, we performed t-distributed stochastic neighbor embedding (tSNE, the genes  
244 with expression value TPM >1 in more than 30 samples were selected) analysis and  
245 illustrated that the day-14-iHPC formed a unique population distinct from  
246 day-11-iHEC and the major population of day-17 iHPC. However, the day-17 iHPC  
247 and day-21 iHPC already merged (Fig. 4f). In addition, the day-21 iHPC formed a  
248 new subpopulation labeled with relatively abundant *Gata2* expression (Supplementary  
249 information, Fig. S5a), indicating the heterogeneity of the iHPC. The

250 endothelia-related transcription factors, such as Sox7 and Sox18, were abundantly  
251 expressed in day-11 iHEC, however, were immediately silenced in day-14 iHPC (Fig.  
252 4g). The *Ets1* gene, involving embryonic endothelial and lymphoid development <sup>46</sup>,  
253 was shut down in day-14 iHPC but turned on again in day-17 iHPC (Fig. 4g). The  
254 transcription factors involving hematopoietic development, such as *Lyl1* <sup>47</sup>, *Etv6* <sup>48</sup>,  
255 *Prdm5* <sup>9</sup>, *Myb* <sup>49</sup>, *Sfpil* <sup>50-52</sup>, and *Meis1* <sup>53</sup>, were widely expressed among day-14, 17,  
256 and 21 iHPC populations. (Fig. 4h). Further, the transcription factors related to  
257 lymphoid development, including *Lmo2* <sup>54</sup>, *Bcl11a* <sup>55</sup>, *Ikzf1* <sup>56</sup>, *Myc* <sup>18,57</sup>, *Gata3* <sup>58</sup>, and  
258 *Tcf7* <sup>38</sup>, were also expressed in iHPC (Fig. 4i; Supplementary information, Fig. S5b).  
259 Of note, day-17 and day-21 iHPC showed abundant expression of *Tcf7* (Fig. 4i).  
260 Given the thymus-homing problem of the PSC-derived HPC reported by others <sup>6</sup>, we  
261 observed that the day-21-iHPC derived from *iR9*-ES abundantly expressed surface  
262 marker-encoding gene *Kit* <sup>18</sup>, *Flt3* <sup>18</sup>, *Cd7* <sup>4,5</sup>, *Ccr9* <sup>59,60</sup>, and *Cxcr4* <sup>61,62</sup>, which is a  
263 feature of natural pre-thymic progenitors possessing thymus-homing ability (Fig. 4j).  
264 However, the subpopulation with relatively abundant Gata2 expression on Day21  
265 lacks the thymus-homing feature genes, indicating that these cells unlikely  
266 contributed to the regenerated iT lymphopoiesis. Collectively, the *iR9*-ES-derived  
267 iHPC show hematopoietic or lymphopoietic features at transcriptome level and the  
268 day-21 iHPC contain robust pre-thymic progenitor-like cells.

### 269 **The iT cells reject allogeneic skin and form memory response *in vivo***

270 To investigate the function of iT cells derived from *iR9*-ESC (C57BL/6 background)  
271 *in vivo*, we transferred the iT cells (5 million equivalents of iT cells per *Rag1*<sup>-/-</sup>)

272 isolated from iT-B-NDG spleen into *Rag1*<sup>-/-</sup> mice (iT-*Rag1*<sup>-/-</sup> mice). Four days after  
273 the adoptive iT cell transfer, we transplanted allogeneic skin from BALB/c mice into  
274 the iT-*Rag1*<sup>-/-</sup> mice. The allogeneic skin grafts were rapidly rejected by iT-*Rag1*<sup>-/-</sup>  
275 mice at around day 9 after transplantation, as indicated by bulged, ulcerative and  
276 necrotic lesions at the graft sites (Fig. 5a). Besides the mature iT cells (CD4SP,  
277 CD8SP) in the PB of iT-*Rag1*<sup>-/-</sup> mice (Fig. 5b), activated CD4SP and CD8SP iT cells  
278 (CD44<sup>high</sup>CD69<sup>+</sup>) were also detected in the rejected allogeneic skin tissues (Fig. 5c).  
279 The iT-*Rag1*<sup>-/-</sup> mice still showed the existence of iT cells in PB thirty days after the  
280 primary allogeneic rejection, and again rejected the secondary allogeneic skin grafts  
281 (Supplementary information, Fig. S6). Flow cytometry indicated that IL17<sup>+</sup> and  
282 IFN $\gamma$ <sup>+</sup> CD4<sup>+</sup> iT cells, and IFN $\gamma$ <sup>+</sup> CD8<sup>+</sup> iT cells existed in the primary- and  
283 secondary-rejected skin grafts (Fig. 5d). Collectively, these results indicated that the  
284 adoptively transferred iT cells in *Rag1*<sup>-/-</sup> mice mediated rejection of allogeneic skin  
285 grafts and sustained immunological memory, suggestive of a typical adaptive  
286 immune response.

### 287 **The iT cells derived from TCR-edited iPSC eradicate tumor cells *in vivo***

288 Regarding the advantages of unlimited cell source and gene-editing advantage of  
289 iPSC, we introduced tumor antigen-specific TCR (MHC-I restricted OVA TCR, OT1)  
290 into *iR9*-iPSC and further assessed the anti-tumor activity of the derived OT1 iT cells.  
291 We reprogrammed mouse MEF (C57BL/6 background, CD45.2 strain) into iPSC  
292 using retroviruses carrying *Oct4/Klf4/Sox2*. Two cassettes of  
293 *rtTA-TRE-Runx1-p2a-Hoxa9-HygroR* and *CAG-OT1-TCR-IRES-GFP-PuroR* were

294 inserted into the loci of *Rosa26* and *Hipp11* of iPSC (*OT1-iR9*-iPSC), respectively  
295 (Fig. 6a). Intracellular staining indicated that the OT1-TCR were expressed in the  
296 *OT1-iR9*-iPSC (Fig. 6b). The *OT1-iR9*-iPSC were further induced into OT1-iHEC  
297 (Fig. 6c) and OT1-iHPC (Fig. 6d). We transplanted the OT1-iHPC (three million per  
298 mouse) into irradiated (4.5 Gy) *Rag1*<sup>-/-</sup> mice (OT1-iHPC recipients) to reconstitute  
299 OT1-iT lymphopoiesis. Six weeks after transplantation, the OT1-iHPC recipients  
300 showed GFP<sup>+</sup>CD8<sup>+</sup> iT cells expressing OT1 TCRαβ in PB (Fig. 6e). We then  
301 engrafted E.G7-OVA tumor cells into the groin of the *Rag1*<sup>-/-</sup> or OT1-iT reconstituted  
302 *Rag1*<sup>-/-</sup> mice (OT1-iT-*Rag1*<sup>-/-</sup> mice) by subcutaneous injection (0.2 million/mouse).  
303 Tumor growth kinetics demonstrated that the E.G7-OVA tumors were dramatically  
304 inhibited in the OT1-iT-*Rag1*<sup>-/-</sup> mice in comparison with the control *Rag1*<sup>-/-</sup> mice (Fig.  
305 6f). We sacrificed the OT1-iT-*Rag1*<sup>-/-</sup> mice for the distribution analysis of the iT cells  
306 in tumors and lymphoid organs 19 days after the tumor cell transplantation. Flow  
307 cytometry analysis demonstrated that the E.G7-OVA tumors in the OT1-iT-*Rag1*<sup>-/-</sup>  
308 mice were infiltrated with CD8<sup>+</sup> OT1-iT cells, which contained effector (CD44<sup>+</sup>  
309 CD62L<sup>-</sup>) and memory (CD44<sup>+</sup> CD62L<sup>+</sup>) iT cells, and IFNγ-secreting iT cells (Fig. 6g).  
310 We also observed abundant CD8<sup>+</sup> iT cells carrying OT1 TCRαβ in the bone marrow,  
311 lymph node, and spleen of these mice (Supplementary information, Fig. S7).  
312 Collectively, these data indicate that the iT cells derived from TCR-engineered iPSC  
313 show anti-tumor activity in a solid tumor model.

## 314 **DISCUSSION**

315 In this study, the iHEC from *iR9*-PSC gave rise to blood progenitor cells preferentially

316 differentiating into iT cells *in vivo*. It is possible that the combinatory expression of  
317 *Runx1* and *Hoxa9*, pivotal transcription factors for definitive hematopoiesis<sup>22-24,63</sup> and  
318 T cell development<sup>18</sup>, synergistically and preferentially orchestrates the T and NK  
319 lineage potentials but intrinsically compromises the other blood lineage potentials  
320 during the early EHT and subsequent hematopoietic maturation phases in our  
321 induction protocol. Regarding the developmental evidence that an earlier wave of  
322 hematopoiesis preceding HSC emergence also produces blood progenitors possessing  
323 the T cell lineage potential<sup>14-16</sup>, it is also possible that the *iR9*-PSC-derived iHPC  
324 resemble the developmental HPC prior to the occurrence of definitive HSC since  
325 overexpression of *Runx1* and *Hoxa9* at definitive HSC phase promoted  
326 myeloid-instead of lymphoid-biased hematopoiesis *in vivo* (Supplementary  
327 information, Fig. S8). The hematopoietic maturation step in the presence of OP9-DL1  
328 feeder line unlikely causes T-lineage-biased iHPC, as an inducible expression of  
329 another transcription factor cocktail in PSC exactly using the same protocol gave rise  
330 to iHPC preferentially contributing to B lymphopoiesis in B-NDG recipients  
331 (unpublished data). Nonetheless, our data support the concept that synergies of  
332 distinct transcription factors intrinsically determine variable hematopoietic lineage  
333 potentials at as early as hemogenic endothelial cell stage.

334 Intravenous infusion of the iHPC from *iR9*-PSC successfully reconstituted iT  
335 lymphopoiesis *in vivo*. The induced LSK cells from the primary iHPC recipients  
336 further gave rise to T lymphocytes in secondary recipients. The occurrences of iDN1,  
337 iDN2, iDN3, iDN4 cells at different time-points in the thymi of iT-B-NDG mice

338 strongly indicated that the induced pre-thymic progenitors (Lin<sup>-</sup>c-kit<sup>+</sup>CD127<sup>+</sup>/CD135<sup>+</sup>)  
339 have the capacities of homing to central lymphoid organs and developed normally  
340 following a cellular trajectory resembling natural T cell development. Despite the  
341 inefficient generation of CD4SP iT cells *in vitro* due to the MHC-I restricted  
342 OP9-DL1 feeder cells, robust phenotypic CD4SP iT cells generated *in vivo* and  
343 successful allogeneic rejection mediated by the CD4SP and CD8SP iT cells support  
344 that the regenerated regulatory iT cells possess normal immune functions. In  
345 combination with the new method of generating induced B (iB) cells (unpublished  
346 data), it would be promising to further test the coordinated immune responses of iT  
347 cells and iB cells in infection models. Besides the pivotal roles of exogenous *Runx1*  
348 and *Hoxa9* during EHT and subsequent iHPC maturation phases, we could not  
349 exclude the possibilities that the weak leaky expression of these two factors further  
350 facilitated the iT cell development *in vivo* after infusion into immune-deficient mice,  
351 as *Runx1* and *Hoxa9* are also involved in T cell development in bone marrow<sup>64</sup> and  
352 thymus<sup>18</sup>. In contrast to our approach, an induced T cell progenitor population  
353 (DN2/DN3 cell phase) from mouse ESC lacked thymus-homing capacity *in vivo* and  
354 required congenic fetal thymus organ for further development into mature T cells<sup>6</sup>,  
355 which implicated that an intrinsic gene network program essential for physiological T  
356 cell development were not fully activated during hematopoietic induction from PSC,  
357 which can be rescued by exogenous expression of *Runx1* and *Hoxa9*. Nonetheless, our  
358 approach fully reconstitutes functional T lymphopoiesis *in vivo* using PSC source,  
359 which avoids the malfunction risks of *in vitro* generated T cells due to the

360 insufficiency of negative and positive selections.

361 The single iHEC exhibited a transcriptome signature resembling E11 AGM EC and  
362 pre-HSC. Activating the signature genes lacking in the iHEC but abundant in natural  
363 E11 AGM EC or pre-HSC might further promote the production of a homogenous  
364 iHEC population, thus consequently resulting in more efficient T cell generation or  
365 multi-lineage hematopoietic reconstitution. The feature of T cell-lineage-bias  
366 commitment from *iR9*-PSC brings advantages for gene editing using *iR9*-PSC rather  
367 than using canonical adult HSPC, since manipulating HSPC *in vitro* always faces  
368 stemness loss and might even introduce unknown impacts on the functions of other  
369 blood lineage derivatives from the edited HSPC.

370 In conclusion, this study establishes a novel approach of preferentially  
371 reconstituting functional and therapeutic T lymphopoiesis *in vivo* using PSC source by  
372 defined transcription factors. At single cell resolution, we unveil that the T-lineage  
373 specification is determined at as early as hemogenic endothelial cell stage and identify  
374 the *bona fide* pre-thymic progenitors with thymus-homing features. Given the  
375 enormous demand of regenerative T lymphopoiesis in treating T cell deficient and  
376 cancer-bearing patients, this study provides insight into therapeutic T lymphopoiesis  
377 using PSC source.

### 378 **ACKNOWLEDGEMENTS**

379 This work is supported by the Strategic Priority Research Program of Chinese  
380 Academy of Sciences (XDA16010601), the CAS Key Research Program of Frontier  
381 Sciences (QYZDB-SSW-SMC057), the Major Research and Development Project of



382 Guangzhou Regenerative Medicine and Health Guangdong Laboratory  
383 (2018GZR110104006), the Chinese Ministry of Science and Technology  
384 (2015CB964401, 2016YFA0100601, 2017YFA0103401, 2015CB964902, and  
385 2015CB964901), the Health and Medical Care Collaborative Innovation Program of  
386 Guangzhou Scientific and Technology (201803040017), the Major Scientific and  
387 Technological Project of Guangdong Province (2014B020225005), the Science and  
388 Technology Planning Project of Guangdong Province (2017B030314056), the  
389 Program for Guangdong Introducing Innovative and Entrepreneurial Teams  
390 (2017ZT07S347), the National Natural Science Foundation of China (31471117,  
391 81470281, 31600948, 31425012).

#### 392 **AUTHOR CONTRIBUTIONS**

393 R.G. and F.H. conducted all the major experiments, data analysis and wrote the  
394 manuscript. Q.W., C.Lv, H.W., L.L., Y.Z., Z.B., M.Z., Y.L., X.L., C.X., T.W., P.Z.,  
395 K.W., Y.D., Y.L., YX.G. and Y.G. participated in multiple experiments; Q.W. and Z.L.  
396 performed RNA-Seq and data analysis. C.Lv, H.W., Y.L., P.Z., Y.L., X.Z. and J.C.  
397 constructed vectors, prepared iPSC, designed and participated gene editing. Y.L. and  
398 YQ.L. discussed the single cell data; B.L. and J.W. discussed the data and wrote the  
399 manuscript; and J.W. designed the project and provided the final approval of the  
400 manuscript.

401 **Competing Interests:** The authors declare no competing interests.

402

#### 403 **MATERIALS AND METHODS**

404 **Mice**

405 B-NDG (NOD-*Prkdc*<sup>Scid</sup>*IL2rg*<sup>tm1</sup>/Bcgen, CD45.1<sup>+</sup>) mice were purchased from  
406 Biocytogen Jiangsu Co., Ltd (Jiangsu, China). BALB/c and C57BL/6 (CD45.2<sup>+</sup>) mice  
407 were purchased from Beijing Vital River Laboratory Animal Technology. *Rag1*<sup>-/-</sup>  
408 mice (C57BL/6 background) were a gift from Dr. Z. Liu from the Institute of  
409 Biophysics (CAS, China). Mice were housed in the SPF-grade animal facility of the  
410 Guangzhou Institutes of Biomedicine and Health, Chinese Academy of Sciences  
411 (GIBH, CAS, China). All animal experiments were approved by the Institutional  
412 Animal Care and Use Committee of Guangzhou Institutes of Biomedicine and Health  
413 (IACUC-GIBH).

414 **Cell culture**

415 Mouse embryonic fibroblasts (MEFs) were derived from 13.5 d.p.c C57BL/6 mouse  
416 embryos. MEFs were maintained in DMEM/high glucose (Hyclone), 10% FBS  
417 (Natocor) supplemented with 1% nonessential amino acids (NEAA, Gibco). C57BL/6  
418 mouse embryonic stem cells (Biocytogen) were maintained on feeder layers in ES  
419 medium containing DMEM/high glucose, 15% FBS (Gibco), 1% NEAA, 1%  
420 GlutaMAX (Gibco), 1% Sodium Pyruvate (Gibco), 0.1 mM  $\beta$ -mercaptoethanol  
421 (Gibco), 1  $\mu$ M PD0325901 (Selleck), 3  $\mu$ M Chir99021 (Selleck) and 1000 U/ml LIF.  
422 The OP9-DL1 cells (GFP<sup>+</sup>) were maintained in  $\alpha$ -MEM (Gibco) supplemented with  
423 20% FBS (CellMax). The AFT024 cell lines (ATCC) were maintained in DMEM/high  
424 glucose, 10% FBS (Natocor) supplemented with 0.1 mM  $\beta$ -mercaptoethanol and 1%  
425 Sodium Pyruvate. HEK293T (ATCC) and Plat-E (Cell Biolabs, Inc) cells were

426 maintained in DMEM/high glucose supplemented with 10% FBS (Natocor).  
427 E.G7-OVA cell line (ATCC) was cultured in RPMI 1640 (Gibco) supplemented with  
428 10% FBS (Natocor), 1% GlutaMAX, 1% sodium pyruvate, and 0.1 mM  
429  $\beta$ -mercaptoethanol.

#### 430 **Hematopoietic differentiation**

431 PSC were trypsinized by 0.05% Trypsin-EDTA (Gibco) and resuspended in the basic  
432 differentiation medium (BDM: IMDM, 15% FBS (Gibco), 200 $\mu$ g/ml iron-saturated  
433 transferrin (Sigma), 0.45 mM monothiolglycerol (Sigma), 1% GlutaMAX, and 50  
434  $\mu$ g/ml ascorbic acid (Sigma)). For removing the feeder layers, the PSC were plated  
435 into the 0.1% gelatin-coated (Merck Millipore) well, and the floating cells were  
436 collected after 40 min. For EB generation<sup>65</sup>, the PSC were resuspended at 100,000  
437 cells/ml in the BDM supplemented with 5 ng/ml BMP4 (Peprotech) and plated at 20  
438  $\mu$ l/drop for inverted culture in 15 cm dishes. At day 2.5, EBs were replanted into  
439 gelatinized plates in BDM supplemented with 5 ng/ml BMP4 and 5 ng/ml VEGF  
440 (Peprotech). At day 6, the medium was changed to BDM supplemented with 2%  
441 conditioned medium derived from the supernatants of AFT024-mIL3, AFT024-mIL6,  
442 AFT024-hFlt3L and AFT024-mSCF cell culture. Doxycycline (1  $\mu$ g/ml, Sigma) was  
443 added at day 6. The medium was replaced every other day. The plates were seeded  
444 with OP9-DL1 cells (20000 cells/well, 12-well plate) 12 hours prior to the  
445 hematopoietic maturation step in EM medium ( $\alpha$ -MEM, 15% DFBS (Hyclone), 200  
446  $\mu$ g/ml iron-saturated transferrin, 0.45 mM monothiolglycerol, 1% GlutaMAX, 50  
447  $\mu$ g/ml ascorbic acid, 2% conditioned medium derived from supernatants of

448 AFT024-mIL3, AFT024-hFlt3L and AFT024-mSCF cell culture and 1  $\mu$ g/ml  
449 doxycycline. 100-500 sorted iHEC were seeded into each well for hematopoietic  
450 maturation. The EM was half-replaced every two days.

#### 451 **Transplantation of iHPC**

452 8-10-week-old B-NDG mice were sublethally irradiated (2.25 Gy) by an X-ray  
453 irradiator (RS2000, Rad Source Inc.). 0.5-1 million PSC-derived iHPC were injected  
454 into each irradiated B-NDG mouse via retro-orbital veins. The mice were fed with  
455 water containing co-trimoxazole (Tianjin Lisheng Pharmaceutical co., LTD) for two  
456 weeks to prevent infection.

#### 457 **T lymphocyte induction *in vitro***

458 For T lymphocyte induction *in vitro*, OP9-DL1 coculture method<sup>1</sup> was used with  
459 minor modifications. Briefly, the single-cell suspensions of iHPC (Day 21) were  
460 maintained on OP9-DL1 feeder cells in T cell induction medium (TIM,  $\alpha$ -MEM, 20%  
461 DFBS, and 1% GlutaMAX) supplemented with 2% conditioned medium derived from  
462 supernatants of AFT024-hFlt3L and AFT024-hIL7 cell culture for sustained 12 days.  
463 The iHEC-derived cells were trypsinized into single-cell suspensions and replanted  
464 into fresh OP9-DL1 monolayers every 6 days. And the TIM was replaced every 3  
465 days.

#### 466 **Gene editing**

467 Mouse MEF cells were reprogrammed into iPSC as described<sup>66</sup>. The *CAG*  
468 *Pr-rtTA-3 $\times$ Stop-TRE-Runx1-p2a-Hoxa9-pA-PGK Pr-HygroR* cassette was inserted  
469 into the *Rosa26 locus* of mouse ESC/iPSC. The positive clones (*iR9*-ESC/iPSC) were

470 selected by Hygromycin B (150  $\mu$ g/ml, Invivogen) were further cultured in ES  
471 medium supplemented with Dox (1  $\mu$ g/ml). The induced expression of *Runx1* and  
472 *Hoxa9* was confirmed by qPCR. For the generation of *OT1-iR9*-iPSC, a *CAG Pr-OT1*  
473 *TCR $\alpha$ -p2a-TCR $\beta$ -IRES-GFP-PGK Pr-PuroR* cassette was inserted into the *Hipp11*  
474 *locus* of *iR9*-iPSC. The *OT1* sequence was cloned from murine TCR OT1-2A.pMIG  
475 II (Addgene). The *OT1-iR9*-iPSC positive clones were further selected by Puromycin  
476 (1  $\mu$ g/ml, Invivogen) and the expression of OT1-TCR were measured by intra-cellular  
477 staining.

#### 478 **Flow cytometry and cell sorting**

479 Single-cell suspensions were prepared by 0.05% Trypsin-EDTA and filtered by 70  $\mu$ m  
480 filter. Single cells were blocked by Fc (CD16/32) (93, eBioscience) antibody, and then  
481 stained with related antibodies. The following antibodies were used: c-kit (2B8,  
482 eBioscience), CD31 (390, eBioscience), CD41 (eBioMWReg30, eBioscience), CD45  
483 (30-F11, eBioscience), CD45.1 (A20, eBioscience), CD45.2 (104, eBioscience), CD2  
484 (RM2-5, eBioscience), CD3 (145-2C11, eBioscience), CD4 (GK1.5, eBioscience),  
485 CD8a (53-6.7, eBioscience), CD19(eBio1D3, eBioscience), B220 (RA3-6B2,  
486 eBioscience), CD11b (M1/70, eBioscience), NK1.1 (PK136, eBioscience), Ter119  
487 (TER-119, eBioscience), Gr1 (RB6-8C5, eBioscience), CD201 (eBio1560,  
488 eBioscience), CD135 (A2F10, eBioscience), CD127 (A7R34 eBioscience) Fc $\epsilon$ RI $\alpha$   
489 (MAR-1, biolegend), CD69 (H1.2F3, biolegend), CD62L (MEL-14, biolegend) IFN $\gamma$   
490 (XMG1.2, biolegend), IL17 (TC11-18H10.1, biolegend), CD44 (IM7, eBioscience),  
491 CD25 (PC61.5, eBioscience), TCR $\beta$  (H57-597, eBioscience), TCR $\gamma$  $\delta$  (GL3,

492 eBioscience), TCR $\alpha$ 2 (B20.1, biolegend), TCR $\nu\beta$ 5.1/5.2 (MR9-4, biolegend)  
493 Streptavidin PE-Cy7 (eBioscience), Streptavidin eFlour 450 (eBioscience),  
494 Streptavidin PE-Cy5 (biolegend). The cells were resuspended in the DAPI solution, or  
495 PI solution (eBioscience) and were analyzed with Fortessa cytometer (BD  
496 Biosciences). The cells were sorted using Arial II cytometer (BD Biosciences). The  
497 flow data were analyzed with FlowJo (Three Star, Ashland OR).

#### 498 **Allogeneic skin transplantation**

499 Individual *Rag1*<sup>-/-</sup> mice (8-10 weeks old) were adoptively transferred with splenic  
500 cells equivalent to 5 million CD4<sup>+</sup> and CD8<sup>+</sup> iT cells from iT-B-NDG mice. Four days  
501 after iT cell transfer, the allogeneic skin (BALB/c background) was transplanted as  
502 described <sup>67</sup>. Grafts were considered rejection if there was a loss of distinct border,  
503 visible signs of ulceration and necrosis to 80% of the graft area. The rejected skin  
504 tissues were removed for analysis 9 days after skin transplantation. For analysis  
505 activated iT cells in rejected skin grafts, the single cell suspensions were prepared as  
506 described <sup>68</sup>. The activated alloreactive iT lymphocytes were defined as  
507 CD45.2<sup>+</sup>Ter119<sup>-</sup>CD11b<sup>-</sup>CD69<sup>+</sup>CD44<sup>+</sup>CD4<sup>+</sup>/CD8<sup>+</sup>. For analysis of cytokines released  
508 by the alloreactive iT cells, we used anti-IL17 and anti-IFN $\gamma$  antibodies following an  
509 intracellular staining protocol (eBioscience).

#### 510 **OT1-iT anti-tumor assay**

511 For the reconstitution of the OT1-iT cells in *Rag1*<sup>-/-</sup> mice, three million OT1-iHPC  
512 were transplanted into each irradiated *Rag1*<sup>-/-</sup> mouse (4.5 Gy). OT1-iT cells (GFP<sup>+</sup>  
513 CD8<sup>+</sup> TCR $\nu\beta$ 5<sup>+</sup> TCR $\alpha$ 2<sup>+</sup>) in PB were analyzed six weeks post-transplantation. The

514 E.G7-OVA cells were transplanted into the groin of the OT1-iT reconstituted mice by  
515 subcutaneous injection (0.2 million/mouse). The tumor size was measured every 2  
516 days and was calculated as length  $\times$  width (mm<sup>2</sup>). Mice with tumor size larger than 20  
517 mm at the longest axis were euthanized for ethical consideration. To analyze the  
518 tumor-infiltrating OT1-iT cells, tumors were isolated at day 15 and digested for 30  
519 min at 37 °C by collagen IV solution (1mg/ml, Gibco) after being cut up. Then, the  
520 single-cell suspensions were harvested for staining. The activated iT cells were  
521 defined as CD45.2<sup>+</sup>GFP<sup>+</sup>CD8<sup>+</sup>CD44<sup>+</sup>CD62L<sup>-</sup>.

## 522 **RNA-seq and data analysis**

523 The cDNA of single iHEC sorted on day 11, and iHPC at Day 14, 17, and 21 or  
524 1,000-CD4SP/CD8SP iT-cell aliquots of from spleens of iT-B-NDG mice were  
525 generated and amplified using Discover-sc WTA Kit V2 (Vazyme). The quality of  
526 amplified cDNA was assessed by qPCR analysis of housekeeping genes (B2m and  
527 Gapdh). Samples that passed quality control were used for sequencing library  
528 preparation by TruePrep DNA Library Prep Kit V2 (Vazyme). All libraries were  
529 sequenced by illumina sequencer NextSeq 500. The raw data (fastq files) were  
530 generated using bcl2fastq software (version 2.16.0.10) and were uploaded to the Gene  
531 Expression Omnibus public database (GSE121371, GSE121373, GSE128738). The  
532 raw reads were aligned to mouse genome mm10 by HISAT2 (version 2.1.0)<sup>69</sup> and the  
533 expression levels in TPM were estimated by StringTie (version 1.3.4)<sup>70,71</sup>. The  
534 wildtype CD4SP T cells, CD8SP T cells, myeloid cells, and B cells sequencing data  
535 (GSE105057) were downloaded from Gene Expression Omnibus<sup>13</sup>. Heat maps were

536 plotted using pheatmap (version 1.0.8). The natural embryonic single-cell data  
537 (endothelial cells (CD31<sup>+</sup>VE-cadherin<sup>+</sup>CD41<sup>-</sup>CD43<sup>-</sup>CD45<sup>-</sup>Ter119<sup>-</sup>) T1 pre-HSC  
538 (CD31<sup>+</sup>CD45<sup>-</sup>CD41<sup>low</sup>c-kit<sup>+</sup>CD201<sup>high</sup>), T2 pre-HSC (CD31<sup>+</sup>CD45<sup>+</sup>c-Kit<sup>+</sup>CD201<sup>+</sup>),  
539 E12 HSC (Lin<sup>-</sup>Sca-1<sup>+</sup>CD11b<sup>low</sup>CD201<sup>+</sup>), E14 HSC (CD45<sup>+</sup>CD150<sup>+</sup>CD48<sup>-</sup>CD201<sup>+</sup>),  
540 and adult HSC (CD45<sup>+</sup>CD150<sup>+</sup>CD48<sup>-</sup>CD201<sup>+</sup>)) were downloaded from Gene  
541 Expression Omnibus (GSE67120)<sup>35</sup>. The batch effects of single-cell data between  
542 iHEC and natural embryonic cells were removed using ComBat (sva R package,  
543 version 3.26.0). The prcomp function of stats (R package, version 3.4.4) was used for  
544 PCA. The DESeq2 was used for differential expression analysis. The PCA plot and  
545 violin plot were plotted using ggplot2 (R package, version 2.2.1). tSNE was  
546 performed by Rtsne (R package version 0.15). The TPM values of transcription  
547 factors were log2-converted.

548 For TCRαβ sequencing, 15,000 sorted CD4SP, and CD8SP naïve iT cells were  
549 sorted from thymus or spleen of iT-B-NDG mice. The sorted iT cells of thymus were  
550 gated on CD45.2<sup>+</sup>Ter119<sup>-</sup>CD11b<sup>-</sup>Gr1<sup>-</sup>CD19<sup>-</sup>B220<sup>-</sup>NK1.1<sup>-</sup>TCRγδ<sup>-</sup>CD4<sup>+</sup>CD8<sup>-</sup> and  
551 CD45.2<sup>+</sup>Ter119<sup>-</sup>CD11b<sup>-</sup>Gr1<sup>-</sup>CD19<sup>-</sup>B220<sup>-</sup>NK1.1<sup>-</sup>TCRγδ<sup>-</sup>CD4<sup>-</sup>CD8<sup>+</sup>. The splenic naïve  
552 iT cells were gated on CD45.2<sup>+</sup>CD4<sup>+</sup>CD8<sup>-</sup>CD62L<sup>+</sup>CD44<sup>-</sup> and  
553 CD45.2<sup>+</sup>CD4<sup>-</sup>CD8<sup>+</sup>CD62L<sup>+</sup>CD44<sup>-</sup>. The cDNA was generated and amplified by  
554 SMARTer Mouse TCRαβ Profiling Kit (Clontech). Libraries were sequenced by  
555 illumina sequencer MiSeq (2×250 cycles). The raw data (fastq files) were generated  
556 using illumina bcl2fastq software and were uploaded to Gene Expression Omnibus  
557 public database (GSE121374). T cell receptors αβ chains repertoires were aligned and



558 assembled using software MiXCR (version 2.1.12)<sup>45</sup>. The TCR $\alpha\beta$  clonotypes were  
559 exported respectively by parameter ‘--chains’ in exportClones command of MiXCR.  
560 The exported clonotypes were visualized in the form of chord diagram using  
561 VDJtools software (version 1.1.10)<sup>72</sup>.

## 562 **Statistics**

563 All quantitative analyses were based on a minimum of at least three sample replicates.  
564 Data are presented as means  $\pm$  s.d. by GraphPad Prism. Independent-sample student T  
565 test and One-way ANOVA were performed (SPSS). NS, not significant; \* $p < 0.05$ ;  
566 \*\* $p < 0.01$ ; \*\*\* $p < 0.001$ .

567

## 568 **REFERENCES**

- 569 1 Schmitt, T. M. & Zuniga-Pflucker, J. C. Induction of T cell development from hematopoietic  
570 progenitor cells by delta-like-1 in vitro. *Immunity* **17**, 749-756 (2002).
- 571 2 Mohtashami, M. *et al.* Direct comparison of Dll1- and Dll4-mediated Notch activation levels  
572 shows differential lymphomyeloid lineage commitment outcomes. *J Immunol* **185**, 867-876,  
573 doi:10.4049/jimmunol.1000782 (2010).
- 574 3 Montel-Hagen, A. *et al.* Organoid-Induced Differentiation of Conventional T Cells from Human  
575 Pluripotent Stem Cells. *Cell Stem Cell* **24**, 376-389 e378, doi:10.1016/j.stem.2018.12.011  
576 (2019).
- 577 4 Awong, G. *et al.* Human proT-cells generated in vitro facilitate hematopoietic stem  
578 cell-derived T-lymphopoiesis in vivo and restore thymic architecture. *Blood* **122**, 4210-4219,  
579 doi:10.1182/blood-2012-12-472803 (2013).
- 580 5 Shukla, S. *et al.* Progenitor T-cell differentiation from hematopoietic stem cells using  
581 Delta-like-4 and VCAM-1. *Nat Methods* **14**, 531-538, doi:10.1038/nmeth.4258 (2017).
- 582 6 Schmitt, T. M. *et al.* Induction of T cell development and establishment of T cell competence  
583 from embryonic stem cells differentiated in vitro. *Nat Immunol* **5**, 410-417,  
584 doi:10.1038/ni1055 (2004).
- 585 7 Sandler, V. M. *et al.* Reprogramming human endothelial cells to haematopoietic cells requires  
586 vascular induction. *Nature* **511**, 312-318, doi:10.1038/nature13547 (2014).
- 587 8 Sugimura, R. *et al.* Haematopoietic stem and progenitor cells from human pluripotent stem  
588 cells. *Nature* **545**, 432-438, doi:10.1038/nature22370 (2017).
- 589 9 Riddell, J. *et al.* Reprogramming committed murine blood cells to induced hematopoietic  
590 stem cells with defined factors. *Cell* **157**, 549-564, doi:10.1016/j.cell.2014.04.006 (2014).

- 591 10 Lis, R. *et al.* Conversion of adult endothelium to immunocompetent haematopoietic stem  
592 cells. *Nature* **545**, 439-445, doi:10.1038/nature22326 (2017).
- 593 11 Stik, G. & Graf, T. Hoxb5, a Trojan horse to generate T cells. *Nat Immunol* **19**, 210-212,  
594 doi:10.1038/s41590-018-0053-y (2018).
- 595 12 Dzierzak, E. & Bigas, A. Blood Development: Hematopoietic Stem Cell Dependence and  
596 Independence. *Cell Stem Cell* **22**, 639-651, doi:10.1016/j.stem.2018.04.015 (2018).
- 597 13 Zhang, M. *et al.* Transcription factor Hoxb5 reprograms B cells into functional T lymphocytes.  
598 *Nat Immunol* **19**, 279-290, doi:10.1038/s41590-018-0046-x (2018).
- 599 14 Yoshimoto, M. *et al.* Autonomous murine T-cell progenitor production in the extra-embryonic  
600 yolk sac before HSC emergence. *Blood* **119**, 5706-5714, doi:10.1182/blood-2011-12-397489  
601 (2012).
- 602 15 Luis, T. C. *et al.* Initial seeding of the embryonic thymus by immune-restricted  
603 lympho-myeloid progenitors. *Nat Immunol* **17**, 1424-1435, doi:10.1038/ni.3576 (2016).
- 604 16 Tian, Y. *et al.* The first wave of T lymphopoiesis in zebrafish arises from aorta endothelium  
605 independent of hematopoietic stem cells. *J Exp Med* **214**, 3347-3360,  
606 doi:10.1084/jem.20170488 (2017).
- 607 17 Zeng, Y. *et al.* Single-Cell RNA Sequencing Resolves Spatiotemporal Development of  
608 Pre-thymic Lymphoid Progenitors and Thymus Organogenesis in Human Embryos. *Immunity*,  
609 doi:10.1016/j.immuni.2019.09.008.
- 610 18 Yui, M. A. & Rothenberg, E. V. Developmental gene networks: a triathlon on the course to T  
611 cell identity. *Nat Rev Immunol* **14**, 529-545, doi:10.1038/nri3702 (2014).
- 612 19 Sroczynska, P., Lancrin, C., Kouskoff, V. & Lacaud, G. The differential activities of Runx1  
613 promoters define milestones during embryonic hematopoiesis. *Blood* **114**, 5279-5289,  
614 doi:10.1182/blood-2009-05-222307 (2009).
- 615 20 Chen, M. J., Yokomizo, T., Zeigler, B. M., Dzierzak, E. & Speck, N. A. Runx1 is required for the  
616 endothelial to haematopoietic cell transition but not thereafter. *Nature* **457**, 887-891,  
617 doi:10.1038/nature07619 (2009).
- 618 21 North, T. E. *et al.* Runx1 expression marks long-term repopulating hematopoietic stem cells in  
619 the midgestation mouse embryo. *Immunity* **16**, 661-672 (2002).
- 620 22 Wang, Q. *et al.* Disruption of the Cbfa2 gene causes necrosis and hemorrhaging in the central  
621 nervous system and blocks definitive hematopoiesis. *Proc Natl Acad Sci U S A* **93**, 3444-3449  
622 (1996).
- 623 23 Okuda, T., van Deursen, J., Hiebert, S. W., Grosveld, G. & Downing, J. R. AML1, the target of  
624 multiple chromosomal translocations in human leukemia, is essential for normal fetal liver  
625 hematopoiesis. *Cell* **84**, 321-330 (1996).
- 626 24 Eilken, H. M., Nishikawa, S. & Schroeder, T. Continuous single-cell imaging of blood  
627 generation from haemogenic endothelium. *Nature* **457**, 896-900, doi:10.1038/nature07760  
628 (2009).
- 629 25 Pereira, C. F. *et al.* Induction of a hemogenic program in mouse fibroblasts. *Cell Stem Cell* **13**,  
630 205-218, doi:10.1016/j.stem.2013.05.024 (2013).
- 631 26 Pearson, S., Cuvertino, S., Fleury, M., Lacaud, G. & Kouskoff, V. In vivo repopulating activity  
632 emerges at the onset of hematopoietic specification during embryonic stem cell  
633 differentiation. *Stem Cell Reports* **4**, 431-444, doi:10.1016/j.stemcr.2015.01.003 (2015).
- 634 27 So, C. W., Karsunky, H., Wong, P., Weissman, I. L. & Cleary, M. L. Leukemic transformation of

- 635 hematopoietic progenitors by MLL-GAS7 in the absence of Hoxa7 or Hoxa9. *Blood* **103**,  
636 3192-3199, doi:10.1182/blood-2003-10-3722 (2004).
- 637 28 Ramos-Mejia, V. *et al.* HOXA9 promotes hematopoietic commitment of human embryonic  
638 stem cells. *Blood* **124**, 3065-3075, doi:10.1182/blood-2014-03-558825 (2014).
- 639 29 Magnusson, M. *et al.* HOXA10 is a critical regulator for hematopoietic stem cells and  
640 erythroid/megakaryocyte development. *Blood* **109**, 3687-3696,  
641 doi:10.1182/blood-2006-10-054676 (2007).
- 642 30 Komorowska, K. *et al.* Hepatic Leukemia Factor Maintains Quiescence of Hematopoietic Stem  
643 Cells and Protects the Stem Cell Pool during Regeneration. *Cell Rep* **21**, 3514-3523,  
644 doi:10.1016/j.celrep.2017.11.084 (2017).
- 645 31 Davis, K. L. Ikaros: master of hematopoiesis, agent of leukemia. *Ther Adv Hematol* **2**, 359-368,  
646 doi:10.1177/2040620711412419 (2011).
- 647 32 Nagel, S. *et al.* NKL homeobox gene activities in hematopoietic stem cells, T-cell development  
648 and T-cell leukemia. *PLoS One* **12**, e0171164, doi:10.1371/journal.pone.0171164 (2017).
- 649 33 Oakley, K. *et al.* Setbp1 promotes the self-renewal of murine myeloid progenitors via  
650 activation of Hoxa9 and Hoxa10. *Blood* **119**, 6099-6108, doi:10.1182/blood-2011-10-388710  
651 (2012).
- 652 34 Ng, E. S. *et al.* Differentiation of human embryonic stem cells to HOXA(+) hemogenic  
653 vasculature that resembles the aorta-gonad-mesonephros. *Nat Biotechnol* **34**, 1168-1179,  
654 doi:10.1038/nbt.3702 (2016).
- 655 35 Zhou, F. *et al.* Tracing haematopoietic stem cell formation at single-cell resolution. *Nature* **533**,  
656 487-492, doi:10.1038/nature17997 (2016).
- 657 36 Inlay, M. A. *et al.* Identification of multipotent progenitors that emerge prior to  
658 hematopoietic stem cells in embryonic development. *Stem Cell Reports* **2**, 457-472,  
659 doi:10.1016/j.stemcr.2014.02.001 (2014).
- 660 37 He, X., Park, K. & Kappes, D. J. The role of ThPOK in control of CD4/CD8 lineage commitment.  
661 *Annu Rev Immunol* **28**, 295-320, doi:10.1146/annurev.immunol.25.022106.141715 (2010).
- 662 38 Germar, K. *et al.* T-cell factor 1 is a gatekeeper for T-cell specification in response to Notch  
663 signaling. *Proc Natl Acad Sci U S A* **108**, 20060-20065, doi:10.1073/pnas.1110230108 (2011).
- 664 39 Aliahmad, P., Seksenyan, A. & Kaye, J. The many roles of TOX in the immune system. *Curr Opin*  
665 *Immunol* **24**, 173-177, doi:10.1016/j.coi.2011.12.001 (2012).
- 666 40 Palacios, E. H. & Weiss, A. Function of the Src-family kinases, Lck and Fyn, in T-cell  
667 development and activation. *Oncogene* **23**, 7990-8000, doi:10.1038/sj.onc.1208074 (2004).
- 668 41 Taghon, T., Yui, M. A. & Rothenberg, E. V. Mast cell lineage diversion of T lineage precursors  
669 by the essential T cell transcription factor GATA-3. *Nat Immunol* **8**, 845-855,  
670 doi:10.1038/ni1486 (2007).
- 671 42 Liu, P., Li, P. & Burke, S. Critical roles of Bcl11b in T-cell development and maintenance of  
672 T-cell identity. *Immunol Rev* **238**, 138-149, doi:10.1111/j.1600-065X.2010.00953.x (2010).
- 673 43 Hahm, K. *et al.* Helios, a T cell-restricted Ikaros family member that quantitatively associates  
674 with Ikaros at centromeric heterochromatin. *Genes Dev* **12**, 782-796 (1998).
- 675 44 Halim, T. Y. *et al.* Retinoic-acid-receptor-related orphan nuclear receptor alpha is required for  
676 natural helper cell development and allergic inflammation. *Immunity* **37**, 463-474,  
677 doi:10.1016/j.immuni.2012.06.012 (2012).
- 678 45 Bolotin, D. A. *et al.* MiXCR: software for comprehensive adaptive immunity profiling. *Nat*

- 679 *Methods* **12**, 380-381, doi:10.1038/nmeth.3364 (2015).
- 680 46 Garrett-Sinha, L. A. Review of Ets1 structure, function, and roles in immunity. *Cell Mol Life Sci*  
681 **70**, 3375-3390, doi:10.1007/s00018-012-1243-7 (2013).
- 682 47 Zohren, F. *et al.* The transcription factor Lyl-1 regulates lymphoid specification and the  
683 maintenance of early T lineage progenitors. *Nat Immunol* **13**, 761-769, doi:10.1038/ni.2365  
684 (2012).
- 685 48 Hock, H. *et al.* Tel/Etv6 is an essential and selective regulator of adult hematopoietic stem cell  
686 survival. *Genes Dev* **18**, 2336-2341, doi:10.1101/gad.1239604 (2004).
- 687 49 Greig, K. T., Carotta, S. & Nutt, S. L. Critical roles for c-Myb in hematopoietic progenitor cells.  
688 *Semin Immunol* **20**, 247-256, doi:10.1016/j.smim.2008.05.003 (2008).
- 689 50 Wilkinson, A. C. *et al.* Single-cell analyses of regulatory network perturbations using  
690 enhancer-targeting TALEs suggest novel roles for PU.1 during haematopoietic specification.  
691 *Development* **141**, 4018-4030, doi:10.1242/dev.115709 (2014).
- 692 51 Pang, S. H. M. *et al.* PU.1 Is Required for the Developmental Progression of Multipotent  
693 Progenitors to Common Lymphoid Progenitors. *Front Immunol* **9**, 1264,  
694 doi:10.3389/fimmu.2018.01264 (2018).
- 695 52 Sugimura, R. The significance and application of vascular niche in the development and  
696 maintenance of hematopoietic stem cells. *Int J Hematol* **107**, 642-645,  
697 doi:10.1007/s12185-018-2450-2 (2018).
- 698 53 Azcoitia, V., Aracil, M., Martinez, A. C. & Torres, M. The homeodomain protein Meis1 is  
699 essential for definitive hematopoiesis and vascular patterning in the mouse embryo. *Dev Biol*  
700 **280**, 307-320, doi:10.1016/j.ydbio.2005.01.004 (2005).
- 701 54 Nam, C. H. & Rabbitts, T. H. The role of LMO2 in development and in T cell leukemia after  
702 chromosomal translocation or retroviral insertion. *Mol Ther* **13**, 15-25,  
703 doi:10.1016/j.ymthe.2005.09.010 (2006).
- 704 55 Yu, Y. *et al.* Bcl11a is essential for lymphoid development and negatively regulates p53. *J Exp*  
705 *Med* **209**, 2467-2483, doi:10.1084/jem.20121846 (2012).
- 706 56 Boutboul, D. *et al.* Dominant-negative IKZF1 mutations cause a T, B, and myeloid cell  
707 combined immunodeficiency. *J Clin Invest* **128**, 3071-3087, doi:10.1172/JCI98164 (2018).
- 708 57 Weng, A. P. *et al.* c-Myc is an important direct target of Notch1 in T-cell acute lymphoblastic  
709 leukemia/lymphoma. *Genes Dev* **20**, 2096-2109, doi:10.1101/gad.1450406 (2006).
- 710 58 Del Real, M. M. & Rothenberg, E. V. Architecture of a lymphomyeloid developmental switch  
711 controlled by PU.1, Notch and Gata3. *Development* **140**, 1207-1219, doi:10.1242/dev.088559  
712 (2013).
- 713 59 Uehara, S. *et al.* Premature expression of chemokine receptor CCR9 impairs T cell  
714 development. *J Immunol* **176**, 75-84 (2006).
- 715 60 Zlotoff, D. A. *et al.* CCR7 and CCR9 together recruit hematopoietic progenitors to the adult  
716 thymus. *Blood* **115**, 1897-1905, doi:10.1182/blood-2009-08-237784 (2010).
- 717 61 Tussiwand, R. *et al.* The preTCR-dependent DN3 to DP transition requires Notch signaling, is  
718 improved by CXCL12 signaling and is inhibited by IL-7 signaling. *Eur J Immunol* **41**, 3371-3380,  
719 doi:10.1002/eji.201141824 (2011).
- 720 62 Janas, M. L. *et al.* Thymic development beyond beta-selection requires phosphatidylinositol  
721 3-kinase activation by CXCR4. *J Exp Med* **207**, 247-261, doi:10.1084/jem.20091430 (2010).
- 722 63 Lawrence, H. J. *et al.* Mice bearing a targeted interruption of the homeobox gene HOXA9

- 723 have defects in myeloid, erythroid, and lymphoid hematopoiesis. *Blood* **89**, 1922-1930  
724 (1997).
- 725 64 Gwin, K. A., Shapiro, M. B., Dolence, J. J., Huang, Z. L. & Medina, K. L. Hoxa9 and Flt3 signaling  
726 synergistically regulate an early checkpoint in lymphopoiesis. *J Immunol* **191**, 745-754,  
727 doi:10.4049/jimmunol.1203294 (2013).
- 728 65 Desbaillets, I., Ziegler, U., Groscurth, P. & Gassmann, M. Embryoid bodies: an in vitro model  
729 of mouse embryogenesis. *Exp Physiol* **85**, 645-651 (2000).
- 730 66 Chen, J. *et al.* Rational optimization of reprogramming culture conditions for the generation  
731 of induced pluripotent stem cells with ultra-high efficiency and fast kinetics. *Cell Res* **21**,  
732 884-894, doi:10.1038/cr.2011.51 (2011).
- 733 67 Lan, P., Tonomura, N., Shimizu, A., Wang, S. & Yang, Y. G. Reconstitution of a functional  
734 human immune system in immunodeficient mice through combined human fetal  
735 thymus/liver and CD34+ cell transplantation. *Blood* **108**, 487-492,  
736 doi:10.1182/blood-2005-11-4388 (2006).
- 737 68 Jiang, X. *et al.* Skin infection generates non-migratory memory CD8+ T(RM) cells providing  
738 global skin immunity. *Nature* **483**, 227-231, doi:10.1038/nature10851 (2012).
- 739 69 Kim, D., Langmead, B. & Salzberg, S. L. HISAT: a fast spliced aligner with low memory  
740 requirements. *Nat Methods* **12**, 357-360, doi:10.1038/nmeth.3317 (2015).
- 741 70 Pertea, M. *et al.* StringTie enables improved reconstruction of a transcriptome from RNA-seq  
742 reads. *Nat Biotechnol* **33**, 290-295, doi:10.1038/nbt.3122 (2015).
- 743 71 Pertea, M., Kim, D., Pertea, G. M., Leek, J. T. & Salzberg, S. L. Transcript-level expression  
744 analysis of RNA-seq experiments with HISAT, StringTie and Ballgown. *Nat Protoc* **11**,  
745 1650-1667, doi:10.1038/nprot.2016.095 (2016).
- 746 72 Shugay, M. *et al.* VDJtools: Unifying Post-analysis of T Cell Receptor Repertoires. *PLoS Comput*  
747 *Biol* **11**, e1004503, doi:10.1371/journal.pcbi.1004503 (2015).

748

749

750 **FIGURE LEGENDS**

751 **Fig. 1 T cell regeneration *in vivo* from *iRunx1-p2a-Hoxa9*-edited embryonic stem**  
752 **cells**

753 **a** The strategy of stepwise T lineage induction by defined transcription factors.

754 *iRunx1*-ESC, and *iRunx1-Xi*-ESC lines (C57BL/6 background, CD45.2 strain) were

755 used for T cell lineage induction. Xi means one of the eight transcription factors

756 *Hoxa5*, *Hoxa7*, *Hoxa9*, *Hoxa10*, *Hlf*, *Ikzf1*, *Nkx2-3*, *Setbp1*. **b** Heatmaps of the eight

757 transcription factors abundantly expressed in embryonic pre-HSC but rarely expressed

758 in *iRunx1*-ES derived iHEC. The expression value (TPM) of each gene was converted

759 by log<sub>2</sub> and illustrated by heatmap (R package). One column represents one cell

760 repeat. (*iRunx1*-iHEC, n=50 single cells, T1-pre-HSC, n=28 single cells). **c** Sorting

761 gates of iHEC population at day 11 derived from *iRunx1-Hoxa9*-ES line (*iR9*-ESC).

762 Two representative plots from five independent experiments are shown. **d**

763 Immuno-phenotypes of pre-thymic progenitors in induced hematopoietic progenitor

764 cells from iHEC after ten-day maturation. Two representative plots from five

765 independent experiments. Lin was defined as

766 CD2<sup>-</sup>CD3<sup>-</sup>CD4<sup>-</sup>CD8<sup>-</sup>CD11b<sup>-</sup>Gr1<sup>-</sup>Ter119<sup>-</sup>CD19<sup>-</sup>NK1.1<sup>-</sup>TCRγδ<sup>-</sup>. Pre-thymic

767 progenitors were defined as Lin<sup>-</sup>c-kit<sup>+</sup>CD127<sup>+</sup>/CD135<sup>+</sup>. **e** Pluripotent stem

768 cell-derived T cells in PB of B-NDG mice were analyzed by flow cytometry 4 weeks

769 after transplantation. One million iHEC-derived hematopoietic cells were transplanted

770 into individual B-NDG mice (CD45.1<sup>+</sup>) irradiated by X-ray (2.25 Gy). Three

771 representative mice from five independent experiments were analyzed. **f** Summary of

772 pluripotent stem cell-derived T cells in PB of individual B-NDG mice from five  
773 independent experiments. Forty B-NDG mice transplanted with ESC-derived iHPC  
774 were analyzed. The box plot shows the percentage of the CD3<sup>+</sup> iT cells in PB, the  
775 percentage values were illustrated by ggplot2 (R package). A base-10 logarithmic  
776 scale was used for the Y-axis. One point represents one mouse.

777 **Fig. 2 Tissue distributions, transcriptome characterization, and TCR $\alpha/\beta$**   
778 **diversities of ESC-derived T Cells**

779 **a** Flow cytometry analysis of mature iT cells in spleen (SP), lymph node (LN), and  
780 peripheral blood (PB) of B-NDG mice transplanted with ESC-derived hematopoietic  
781 cells. Each B-NDG mouse was transplanted with one million iHPC collected on day  
782 21. Representative mouse was sacrificed and analyzed at 5 and 6 weeks after  
783 transplantation. Data from two representative mice are shown. **b** Flow cytometry  
784 analysis of iDN cells in the thymus of B-NDG mice transplanted with ESC-derived  
785 hematopoietic cells. Each B-NDG mouse was transplanted with one million iHPC at  
786 day 21. Representative mouse was sacrificed and analyzed at 4 and 5 weeks after  
787 transplantation. Data from four representative mice of two independent experiments  
788 are shown. Lin was defined as Ter119<sup>-</sup>CD11b<sup>-</sup>Gr1<sup>-</sup>CD19<sup>-</sup>B220<sup>-</sup>NK1.1<sup>-</sup>TCR $\gamma\delta$ <sup>-</sup>. **c** Flow  
789 cytometry analysis of iHPC in bone marrow (BM) transplanted with iHPC. Each  
790 B-NDG mouse was transplanted with one million iHPC collected at day 10 in the  
791 presence of OP9-DL1 feeder cells. Representative mouse was sacrificed and analyzed  
792 5 weeks and 6 weeks after transplantation. The BM-derived iHPC  
793 (CD45.2<sup>+</sup>Lin<sup>-</sup>c-kit<sup>mid</sup>Sca1<sup>+</sup>) were sorted for 2nd transplantation. Data from two mice



794 are shown. **d** Flow cytometry analysis of iT and iNK in PB, spleen (SP) and bone  
795 marrow (BM) 6 weeks after 2nd transplantation. 500 LSK cells from primary iT mice  
796 were used as input for secondary transplantation. The secondary recipients were  
797 sacrificed and analyzed 6 weeks after transplantation. Data from one mouse are  
798 shown. **e** Characterization of surface markers on CD4SP and CD8SP iT cells. CD4SP  
799 and CD8SP iT cells were sorted from the spleens of B-NDG mice transplanted with  
800 ESC derived hematopoietic cells at week-5. One biological replicate per column.  
801 Myeloid cells (n = 2 sample repeats): Ter119<sup>-</sup>CD3<sup>-</sup>CD19<sup>-</sup>CD11b<sup>+</sup>; B cells (n = 4  
802 sample repeats): Ter119<sup>-</sup>CD11b<sup>-</sup>CD3<sup>-</sup>CD19<sup>+</sup>; CD4<sup>+</sup> cells (n = 3 sample repeats):  
803 Ter119<sup>-</sup>CD19<sup>-</sup>CD11b<sup>-</sup>CD4<sup>+</sup>; CD8<sup>+</sup> cells (n = 3 sample repeats): Ter119<sup>-</sup>CD19<sup>-</sup>  
804 CD11b<sup>-</sup>CD8<sup>+</sup> iCD4<sup>+</sup> cells (n = 3 sample repeats): CD45.2<sup>+</sup>Ter119<sup>-</sup>CD19<sup>-</sup>CD11b<sup>-</sup>  
805 CD4<sup>+</sup>; iCD8<sup>+</sup> cells (n = 3 sample repeats): CD45.2<sup>+</sup>Ter119<sup>-</sup>CD19<sup>-</sup>CD11b<sup>-</sup>CD8<sup>+</sup>. **f**  
806 Characterization of transcription factors in CD4SP and CD8SP iT cells. **g** Chord  
807 diagram of TCR $\alpha$  diversity in thymus iT cells. **h** Chord diagram of TCR $\beta$  diversity in  
808 thymus iT cells. **i** Chord diagram of TCR $\alpha$  diversity in thymus iT cells. **j** Chord  
809 diagram of TCR $\beta$  diversity in spleen iT cells. Aliquots of sorted 15,000 naïve CD4SP  
810 and CD8SP iT cells from either thymus or spleen of iT-B-NDG mice were used as  
811 cell inputs for TCR $\alpha\beta$  sequencing.

812 **Fig. 3 Assessment of T potential of single iHEC from *iR9*-ESC**

813 **a** The strategy of T cell induction from *iR9*-ESC-derived single iHEC. Single iHEC  
814 were sorted into individual wells (24-well plates) pre-seeded with OP9-DL1 feeder  
815 cells (10000 cells/well) 12 hours prior maturation in EM medium with doxycycline (1



816  $\mu\text{g/ml}$ ). Doxycycline was sustained for 10 days during the maturation step. After  
817 maturation, the bulk blood cells were assessed for T lineage generation potential. For  
818 *in vivo* T cell regeneration, the single iHEC-derived bulk hematopoietic cells (day 10)  
819 were transplanted into individual B-NDG recipients. For *in vitro* T cell induction, the  
820 medium was changed to T cell induction medium (TIM,  $\alpha$ -MEM, 20% DFBS, and 1%  
821 GlutaMAX) supplemented with 2% conditioned medium derived from supernatants of  
822 AFT024-hFlt3L and AFT024-hIL7 cell culture for sustaining 12 days. **b** Single iHEC  
823 efficiently gave rise to T cells. Three hundred and eighty-four single-iHEC at Day 11  
824 were sorted into individual wells (24 well plates). Thirty single-iHEC-formed blood  
825 colonies were induced for T cell generation *in vitro*. Cell collections of Twenty-five  
826 single-iHEC-formed blood colonies were transplanted into 25 individual B-NDG  
827 mice for the assessment of T lymphopoiesis *in vivo*. **c** Flow cytometry analysis of  
828 induced T cells from *in vitro* induction of single iHEC. iT cells from single iHEC  
829 culture product (day 22) were analyzed. Plots of iT cells induced from one  
830 representative colony are shown. **d** Single iHEC-derived hematopoietic cells gave rise  
831 to mature iT cells in PB of B-NDG recipient mice 4 weeks after transplantation. Plots  
832 of one representative mouse are shown.

833 **Fig. 4 Single-cell transcriptomic characterization of iHEC and iHPC**

834 **a** Principal component analysis (PCA) of iHEC and developmental E11 AGM-derived  
835 EC, T1 pre-HSC, T2 pre-HSC, E12 HSC, E14 HSC, and adult HSC. The TPM values  
836 of iHEC (n = 70), natural E11 AGM-derived EC (n = 17), T1 pre-HSC (n = 28), T2  
837 pre-HSC (n = 32), E12 HSC (n = 21), E14 HSC (n = 32) and adult HSC (n = 47)

838 single-cell RNA-Seq data were calculated with Stringtie package. **b** The expression of  
839 the top 100 genes contributing most to PC2 (50 genes for each direction). The  
840 expression value (TPM) of each gene was converted by log2 and illustrated by  
841 pheatmap (R package). One column represents one cell repeat. **c** Violin plots show the  
842 expression profile of selected artery (A) and vein (V) related genes (A: *Nrp1*, *Efnb2*,  
843 and *Hey1*; V: *Nrp2*, *Nr2f2*, and *Ephb4*) in single iHEC. The expression value (TPM)  
844 of each gene was converted by log2 and illustrated by ggplot2 (R package). One point  
845 represents one cell. **d** Violin plots show the expression profile of selected surface  
846 markers (*Cdh5*, *Esam*, *Tek*, *Procr*, *Cd47*, and *Cd63*) in single iHEC. The expression  
847 value (TPM) of each gene was converted by log2 and illustrated by ggplot2 (R  
848 package). One point represents one cell. **e** Violin plots show the expression profile of  
849 selected transcription factors (*Fli1*, *Erg1*, *Lmo2*, *Lyl1*, *Tal1*, *Sox7*, *Runx1*, *Mycn*,  
850 *Gata2*, *Bcl11a*, *Hoxa9*, and *Hoxb5*) related to hematopoietic development in single  
851 iHEC. The expression value (TPM) of each gene was converted by log2 and  
852 illustrated by ggplot2 (R package). One point represents one cell. **f** Two-dimensional  
853 tSNE analysis of iHEC and iHPC single-cell RNA-Seq. For single-cell RNA-Seq, the  
854 iHEC were collected on day 11, and the iHPC were collected at Day14, 17 and 21.  
855 Each dot represents one cell. The TPM values of iHEC (n = 65), iHPC at Day14 (n =  
856 21), Day17 (n = 18) and Day21 (n = 56) from single-cell RNA-Seq data were  
857 calculated with Stringtie package. Cell types were defined as: iHEC  
858  $CD31^+CD41^{low}CD45^c\text{-kit}^+CD201^{high}$ ; Day14 and Day17 iHPC,  $CD45^+Lin$   
859  $(Ter119/Gr1/F4-80/CD2/CD3/CD4/CD8/CD19/Fc\epsilon RI\alpha)^-$ ; Day21 iHPC

860 Ter119<sup>-</sup>CD45<sup>+</sup>c-kit<sup>+</sup> CD127<sup>+</sup>. **g** tSNE analysis of the expression pattern of selected  
861 endothelia-related transcription factors (*Sox7*, *Sox18*, and *Ets1*) in iHEC and iHPC. **h**  
862 tSNE analysis of the expression pattern of selected hematopoietic-related transcription  
863 factors (*Lyl1*, *Etv6*, *Prdm5*, *Myb*, *Sfp11*, and *Meis1*) in iHEC and iHPC. **i** tSNE  
864 analysis of the expression pattern of selected T cell development-related transcription  
865 factors (*Lmo2*, *Bcl11a*, *Ikzf1*, *Myc*, *Gata3*, and *Tcf7*) in iHEC and iHPC at Day14,  
866 Day17, and Day21. **j** tSNE analysis of the expression pattern of selected  
867 lymphopoiesis-related surface protein-coding genes (*Kit*, *Flt3*, *Cd7*, *Ccr9*, *Ccr7*, and  
868 *Cxcr4*) in iHEC and iHPC at Day14, Day17, and Day21.

869 **Fig. 5 iT cells reject allogeneic skin in adoptively transferred *Rag1*<sup>-/-</sup> mice**

870 **a** The images of allogeneic skin grafts. Representative images of rejected allogeneic  
871 skin tissues on ESC-iT-*Rag1*<sup>-/-</sup> (day 9) mice (n = 2) and grafted skin tissue on control  
872 *Rag1*<sup>-/-</sup> mice (day 30) were shown. **b** Flow cytometry analysis of the ESC-iT cells in  
873 peripheral blood (PB) of adoptively ESC-iT transferred *Rag1*<sup>-/-</sup> recipients nine days  
874 after the allogeneic skin grafted. Plots of two representative mice are shown. **c** Flow  
875 cytometry analysis of the activation status of the ESC-iT cells in the rejected  
876 allogeneic skin tissues. The rejected allogeneic skin tissues were from the adoptively  
877 ESC-iT transferred *Rag1*<sup>-/-</sup> recipients nine days after the allogeneic skin grafted. The  
878 activated ESC-iT cells were defined as CD4<sup>+</sup>/CD8<sup>+</sup> CD44<sup>high</sup> CD69<sup>+</sup>. Rejected skin  
879 tissues from two representative ESC-iT transferred *Rag1*<sup>-/-</sup> mice were analyzed. **d**  
880 Flow cytometry analysis of the intracellular cytokine IFN $\gamma$  and IL-17 secreted by the  
881 CD4<sup>+</sup> or CD8<sup>+</sup> ESC-iT cells in rejected allogeneic skin tissues. 1<sup>st</sup> allogeneic skin

882 grafts were analyzed at day 9 and 2<sup>nd</sup> allogeneic skin grafts were analyzed at day 6  
883 after skin transplantation. Data from primary and secondary rejected skin tissues from  
884 one representative ESC-iT cells transferred *Rag1*<sup>-/-</sup> mouse are shown.

885 **Fig. 6 OT1-iT cell therapy suppresses the solid tumor growth in mice**  
886 **transplanted with E.G7-OVA cells**

887 **a** Schematic diagram of OT1 engineered iT cells for anti-tumor therapy. Mouse MEF  
888 cells were isolated from CD45.2<sup>+</sup> C57BL/6 mouse and reprogrammed into iPSC with  
889 Oct4, Klf4, and Sox2 retro-viruses. Then a *rtTA-TRE-Runx1-Hoxa9-HygroR* DNA  
890 cassette was inserted into the *Rosa26 locus*. Next, a *CAG-OT1-IRES-GFP-PuroR*  
891 expression element was inserted into the *Hipp11 locus* of *iR9*-iPSC. OT1-*iR9*-iPSC  
892 results in the production of CD8<sup>+</sup> T cells carrying TCRV $\alpha$ 2 and TCRV $\beta$ 5 (MHC class  
893 I-restricted, ovalbumin-specific TCR). OT1-*iR9*-iPSC-derived iHEC were induced  
894 into iHPC (OT1-iHPC) as described in material and method sections. The iHPC were  
895 injected into irradiated (4.5 Gy) *Rag1*<sup>-/-</sup> recipient mice (3 million/mouse,  
896 8-10-week-old C57BL/6 background). E.G7-OVA tumor cell line (C57BL/6  
897 background) were transplanted into the groin of the *Rag1*<sup>-/-</sup> (n = 8) or OT1-iT-*Rag1*<sup>-/-</sup>  
898 (n = 8) by subcutaneous injection (0.2 million/mouse) six weeks after OT1-iHPC  
899 transplantation. **b** TCRV $\alpha$ 2 and TCRV $\beta$ 5 expression in OT1-*iR9*-iPSC measured by  
900 intracellular staining. The *iR9*-iPSC was used as negative control. **c** Sorting gates of  
901 the OT1-*iR9*-iPSC-derived iHEC population at day 11. The cells were enriched by  
902 streptavidin-beads recognizing biotin-CD31 before sorting. Representative plots from  
903 three independent experiments are shown. **d** Immuno-phenotypes of pre-thymic

904 progenitors in induced hematopoietic progenitor cells from *OT1-iR9*-iPSC-derived  
905 iHEC after ten-day maturation. Representative plots from three independent  
906 experiments are shown. Lin was defined as  
907  $CD2^{-}CD3^{-}CD4^{-}CD8^{-}CD11b^{-}Gr1^{-}Ter119^{-}CD19^{-}NK1.1^{-}TCR\gamma\delta^{-}$ . pre-thymic  
908 progenitors were defined as  $Lin^{-}c-kit^{+}CD127^{+}/CD135^{+}$ . e TCRV $\alpha$ 2 and TCRV $\beta$ 5  
909 expression of iT cells in PB of *Rag1*<sup>-/-</sup> mice 6 weeks after transplantation of  
910 *OT1-iR9*-iPSC-derived iHPC. Three representative mice from three independent  
911 experiments were analyzed. f Tumor growth in *Rag1*<sup>-/-</sup> and *OT1-iT-Rag1*<sup>-/-</sup> mice.  
912 E.G7-OVA cells were transplanted into the groin of the *Rag1*<sup>-/-</sup> (n = 8) or  
913 *OT1-iT-Rag1*<sup>-/-</sup> mice (n = 8) by subcutaneous injection (0.2 million/mouse). The  
914 length and width of the tumors were measured every other day by a caliper, and each  
915 tumor size was calculated as length  $\times$  width (mm<sup>2</sup>). Mice with tumor size larger than  
916 20 mm at the longest axis were euthanized for ethical consideration. \*\*\* P < 0.001  
917 (independent t-test, two-tailed). g Characterization of the OT1-iT cells in the tumors.  
918 The tumors were isolated at day 19 after injection and disaggregated by collagenase  
919 IV to single cell suspensions. The effector iT cells were defined as  $CD44^{+}CD62L^{-}$ .  
920 The memory iT cells were defined as  $CD44^{+}CD62L^{+}$ . IFN $\gamma$  secreted by  $CD8^{+}$  OT1-iT  
921 cells in the tumors were intra-cellular stained. Representative plots from two tumors  
922 are shown.

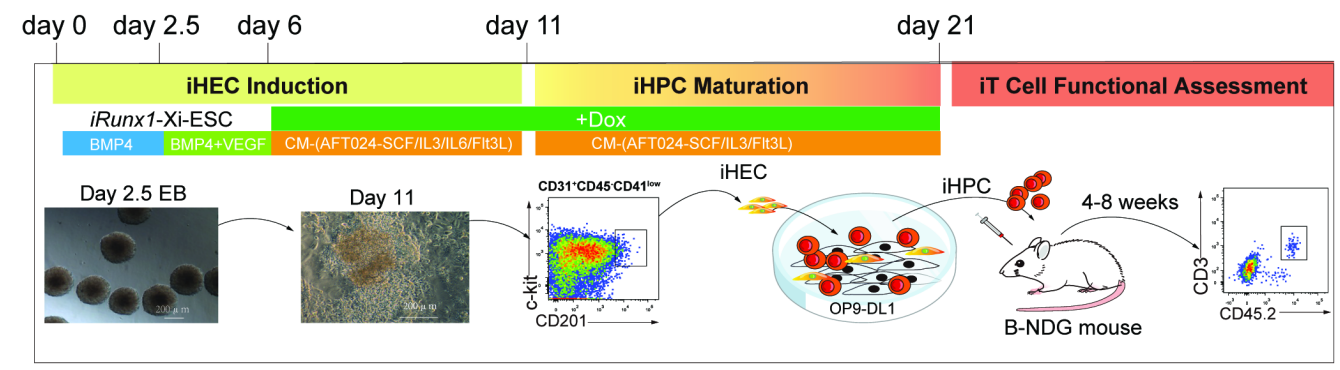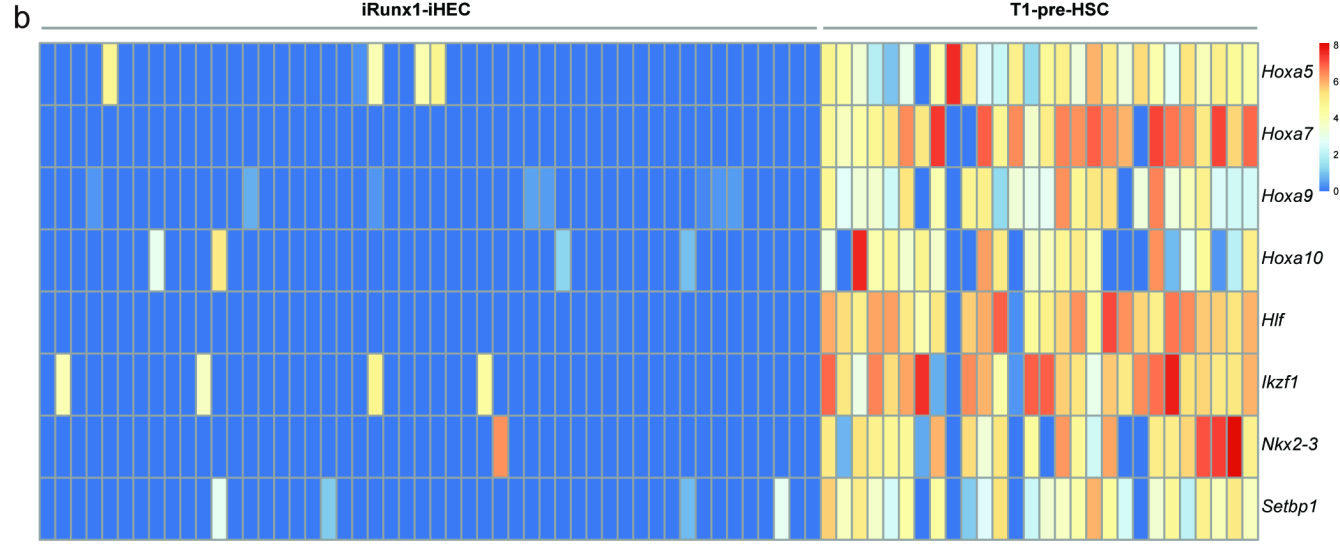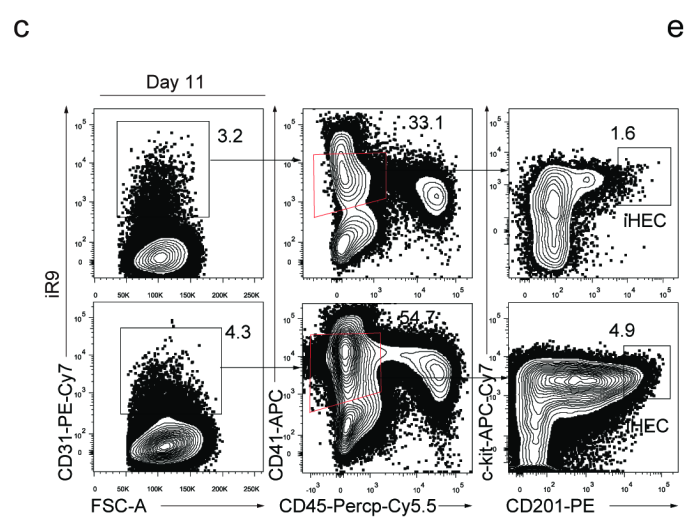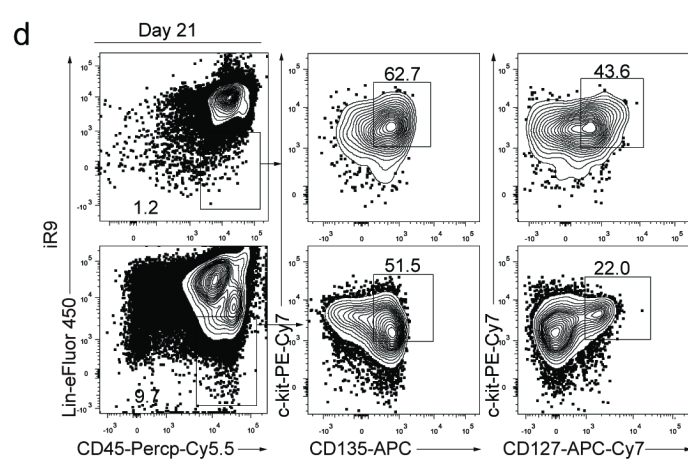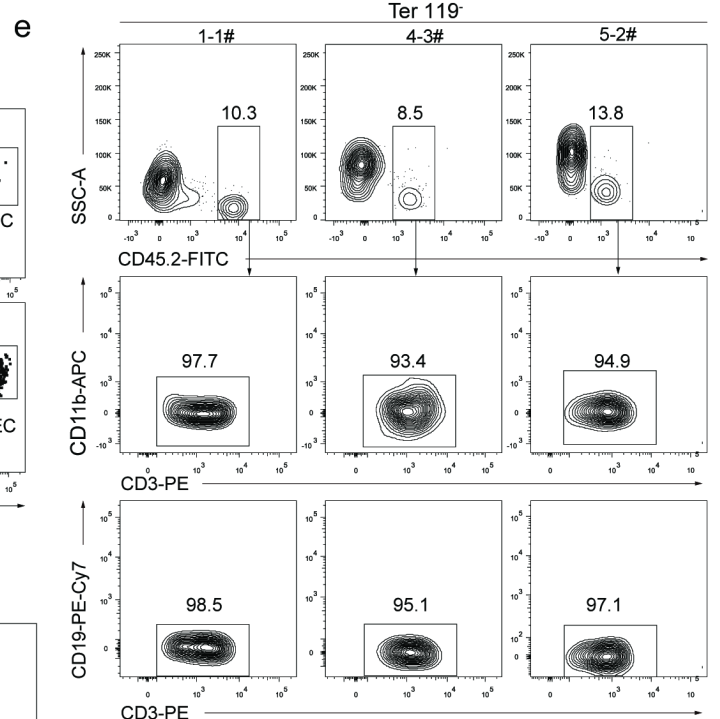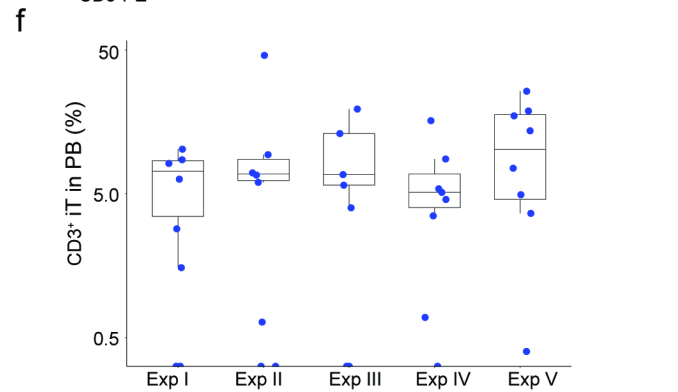



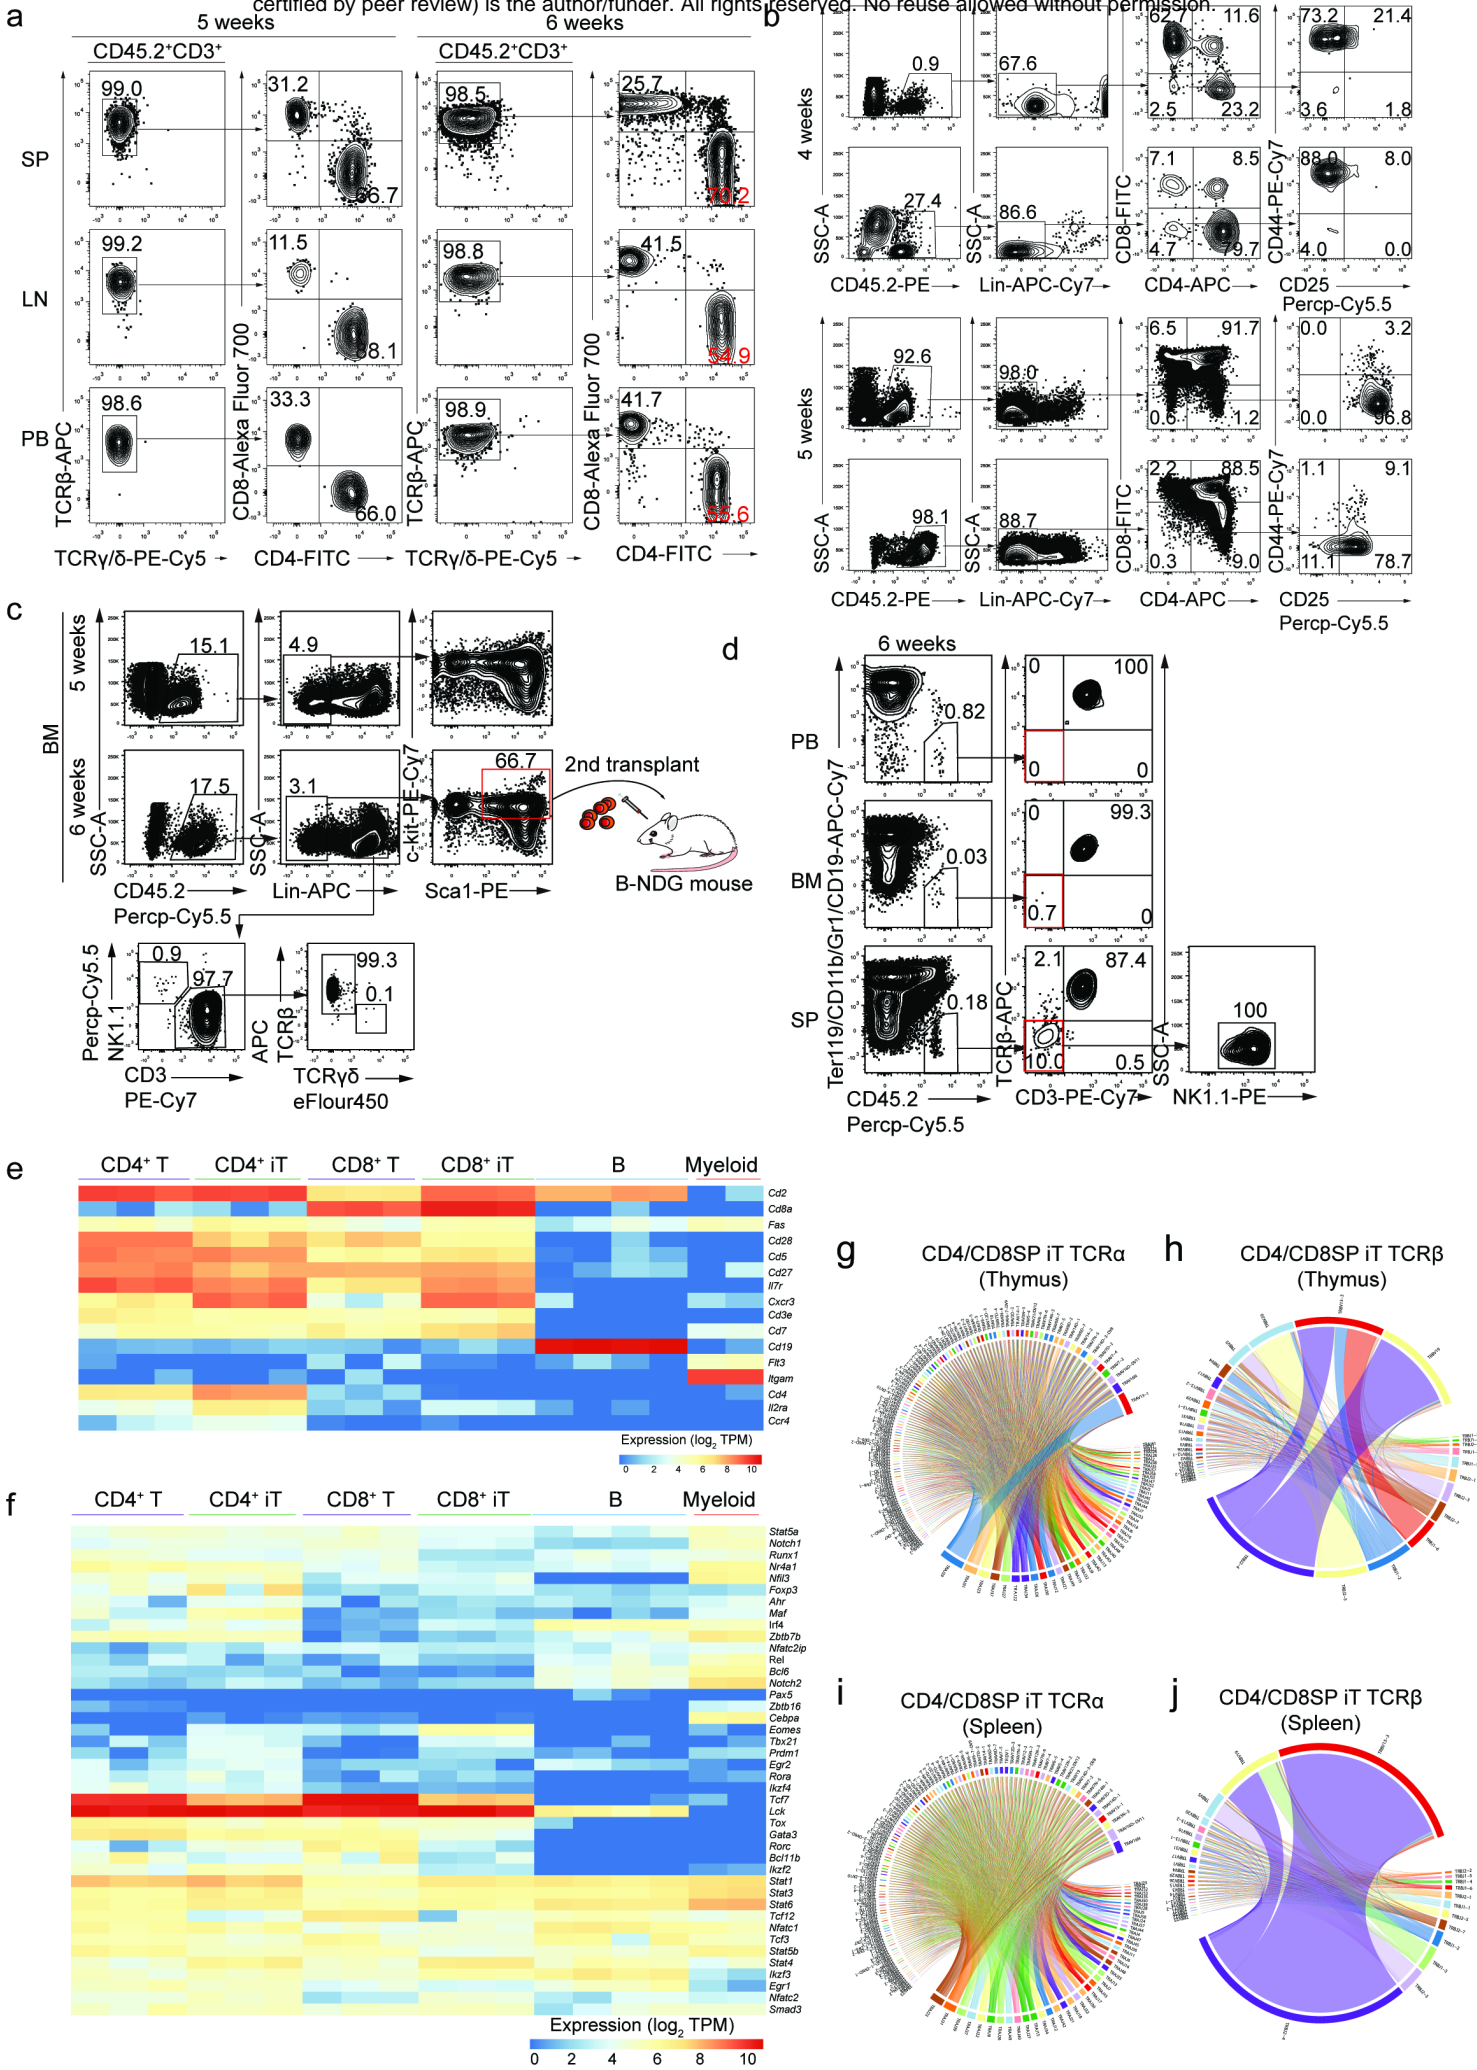

Fig. 3  
a

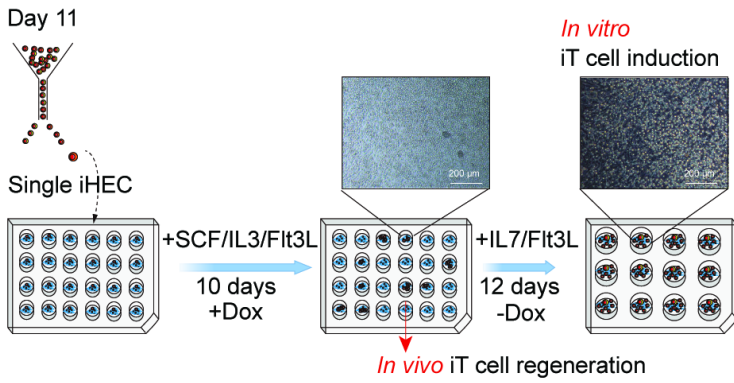

b

| Experiments | Hematopoietic colony forming efficiency % | iT induction (in vitro) % | iT regeneration (in vivo) % |
|-------------|-------------------------------------------|---------------------------|-----------------------------|
| I           | 20.8 (20/96)                              | 100 (10/10)               | 30 (3/10)                   |
| II          | 15.6 (15/96)                              | 100 (5/5)                 | NA                          |
| III         | 19.8 (19/96)                              | NA                        | 30 (3/10)                   |
| IV          | 22.9 (22/96)                              | 100 (15/15)               | 20 (1/5)                    |

c

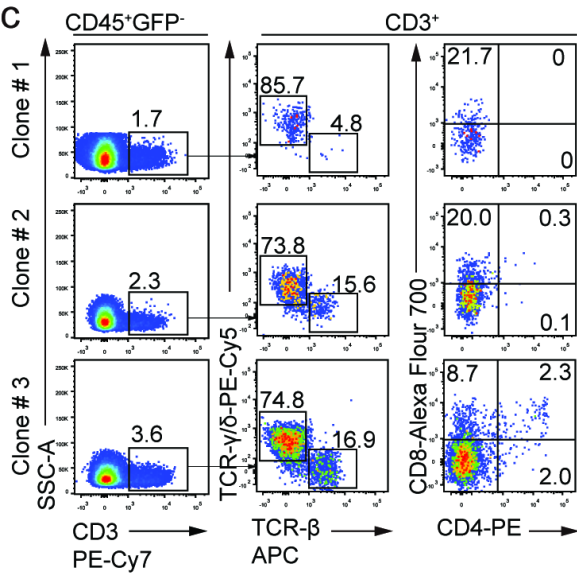

d

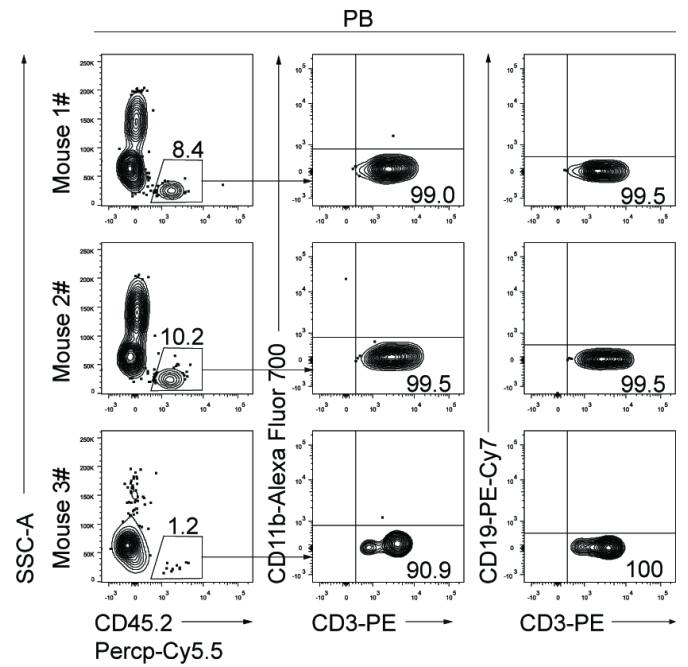



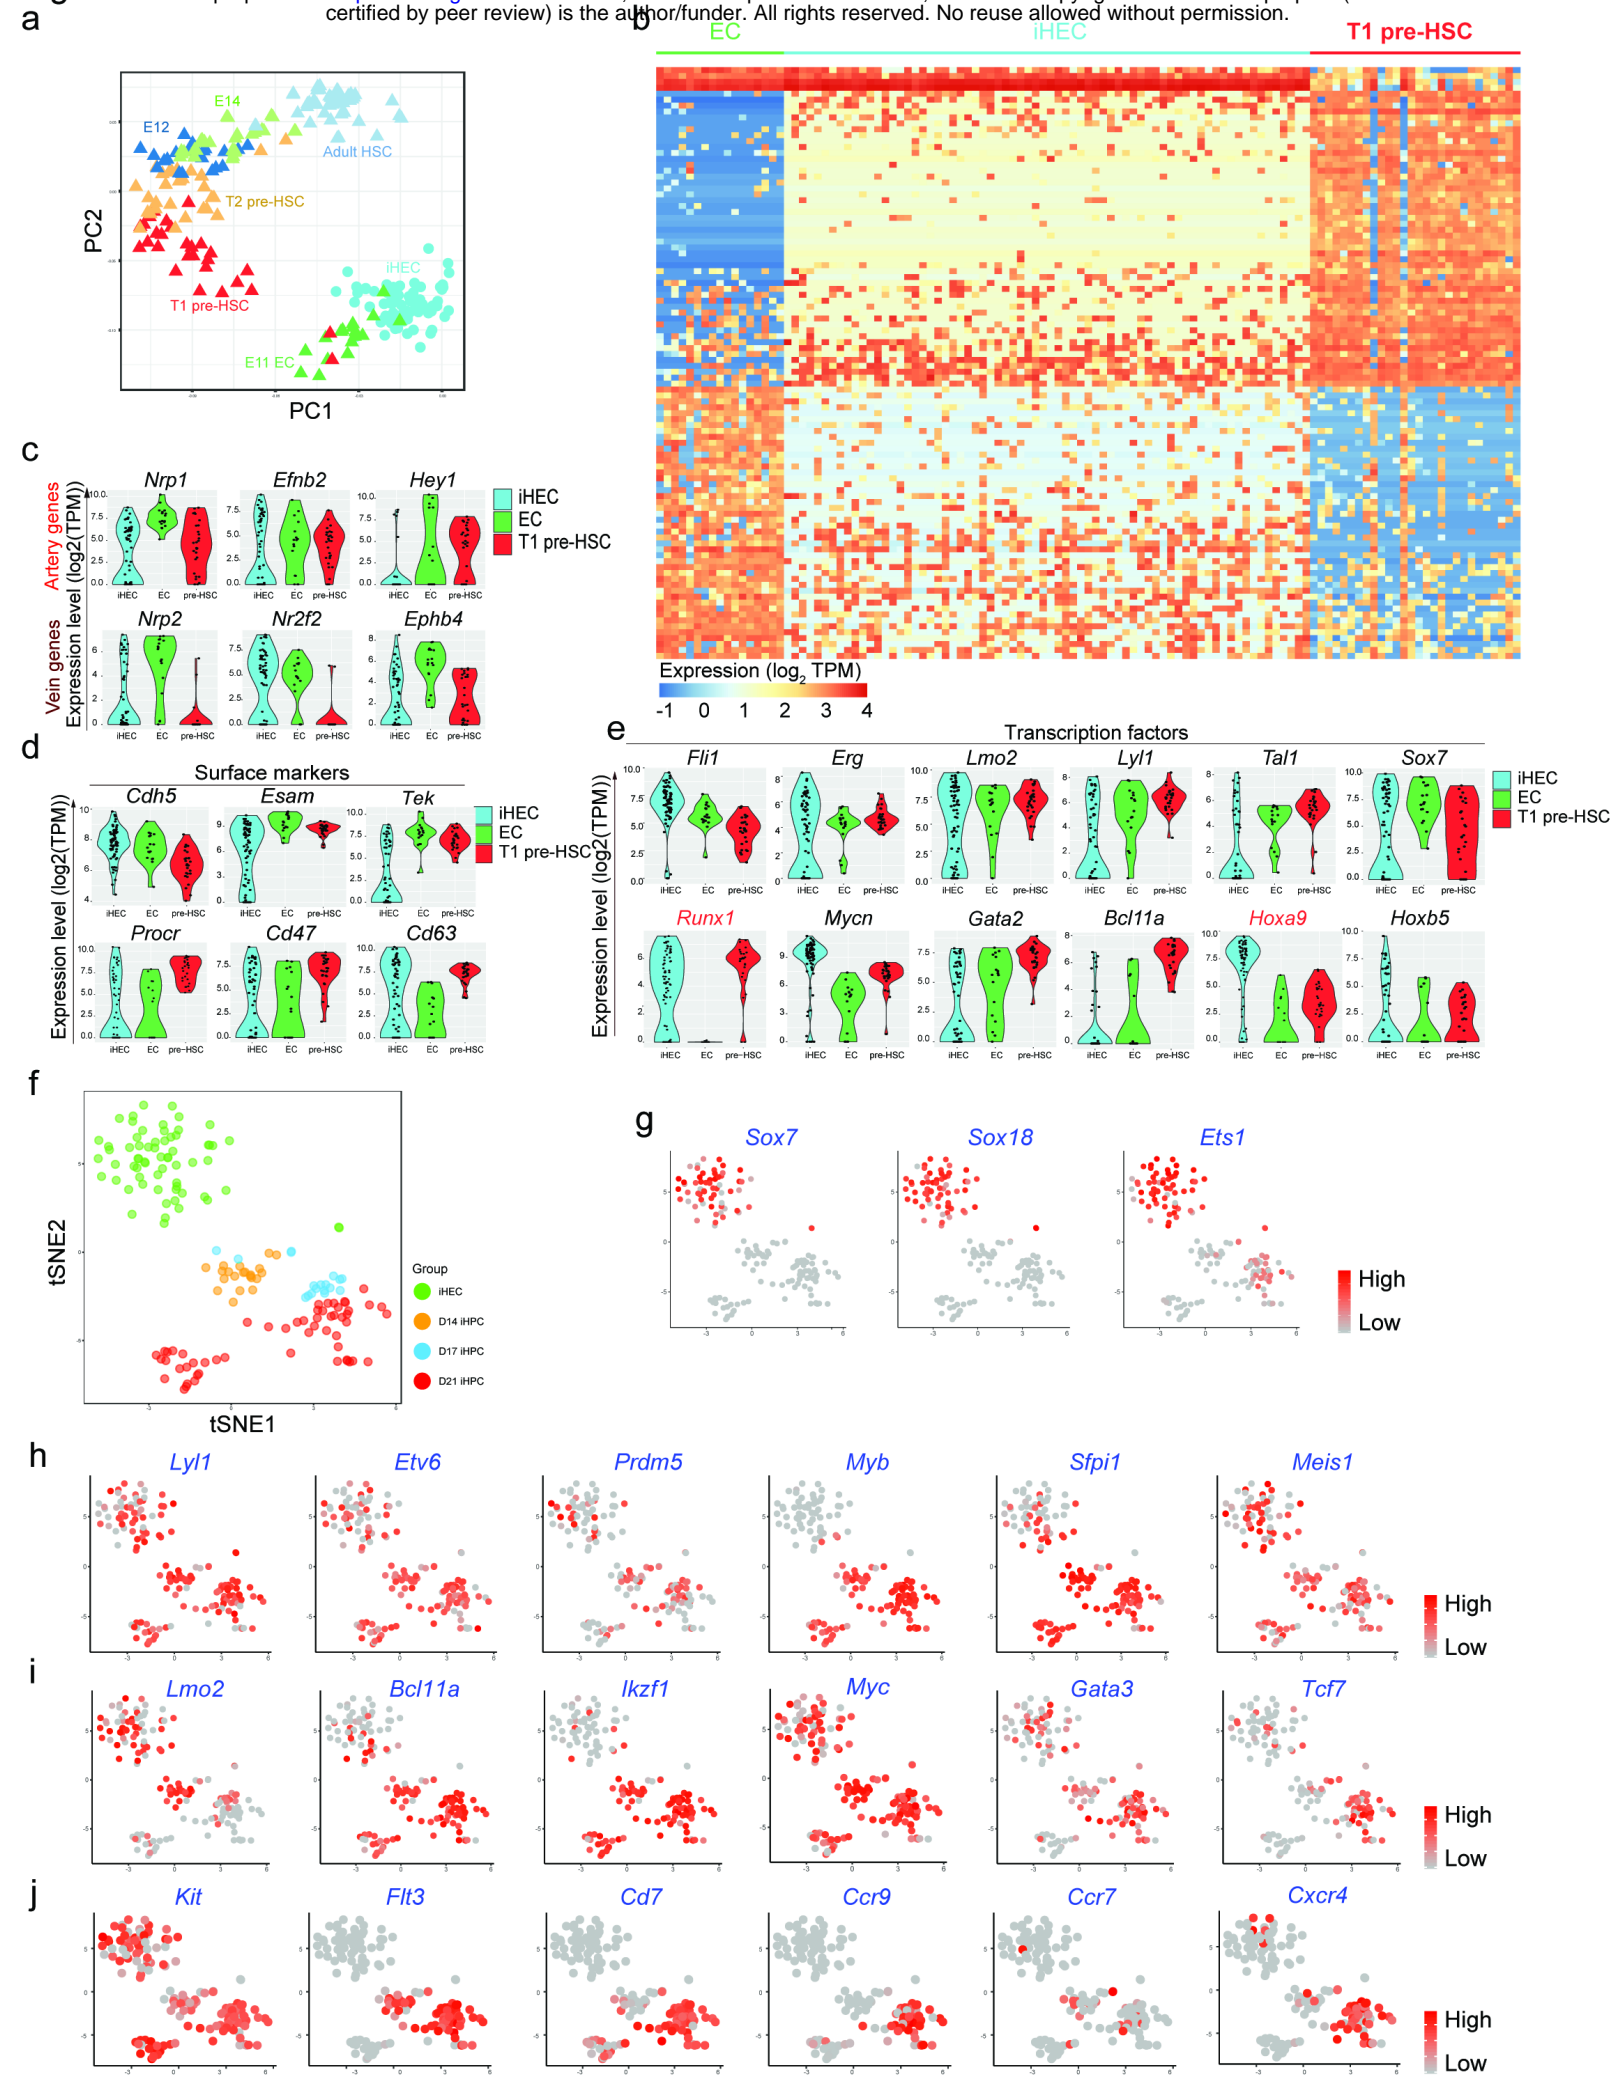

Fig. 5

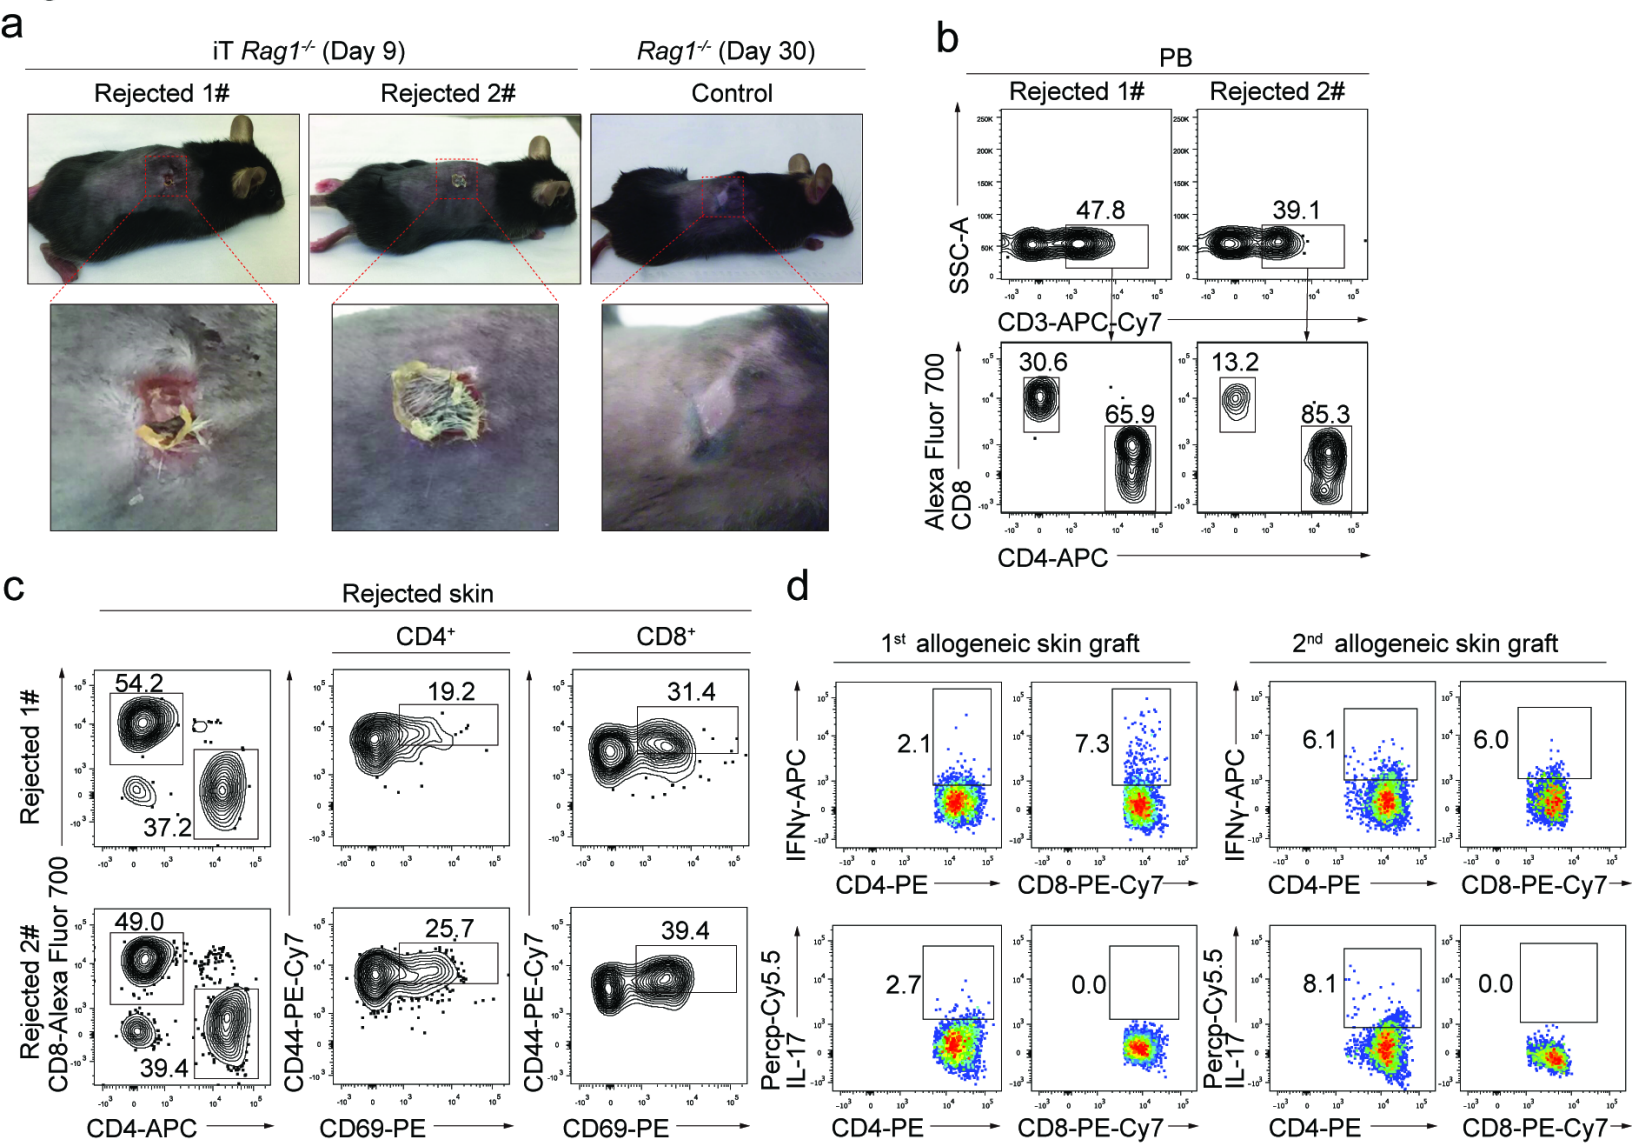

Fig. 6  
a

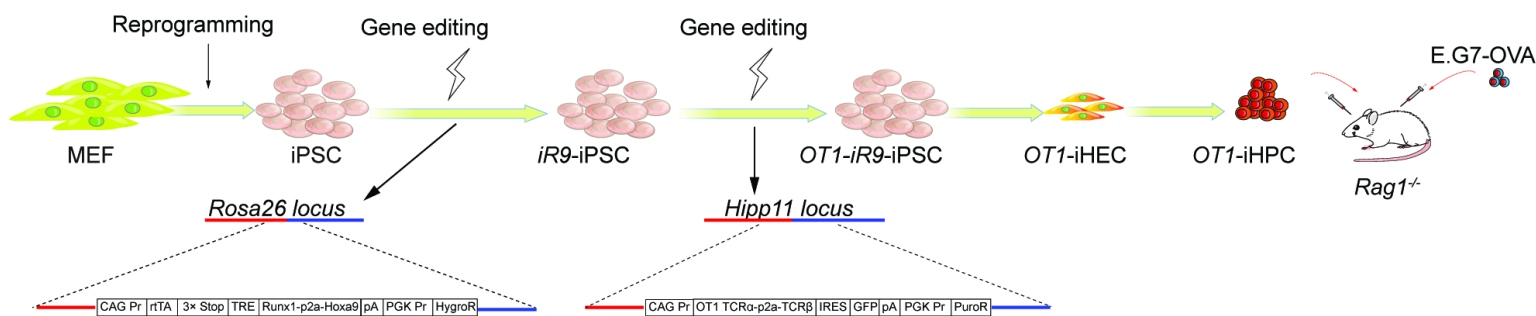

b

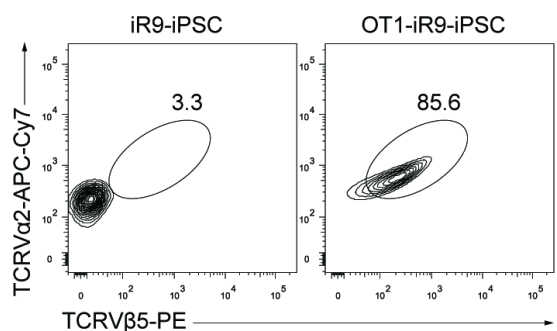

c

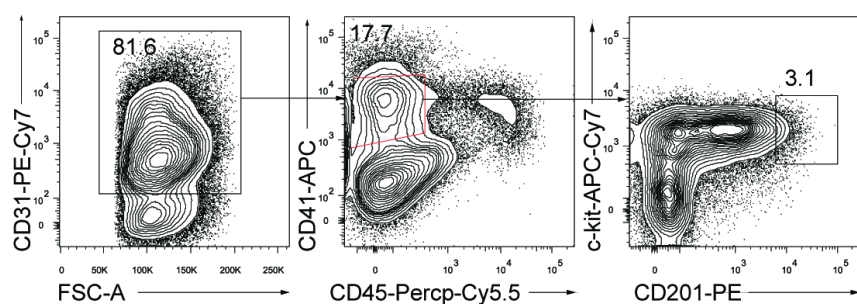

d

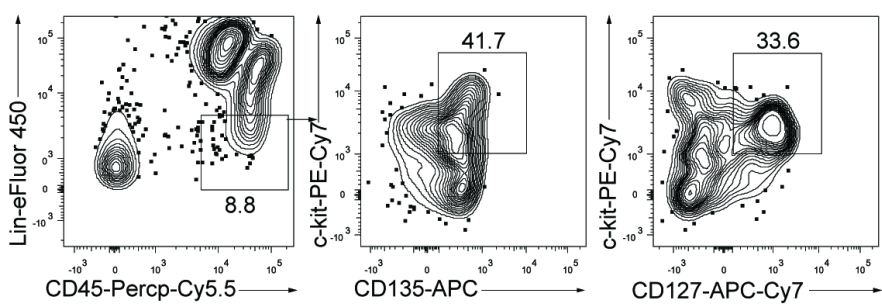

f

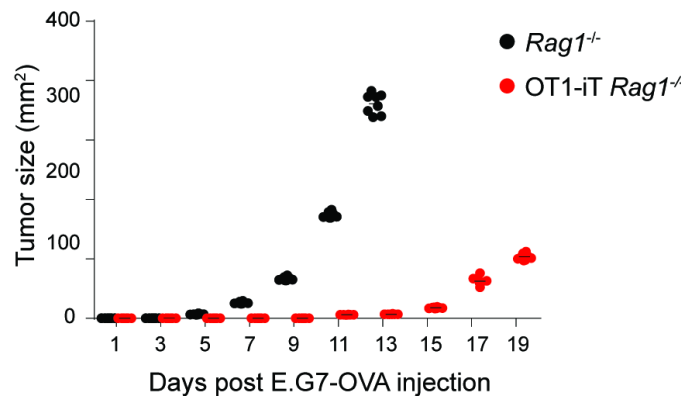

e

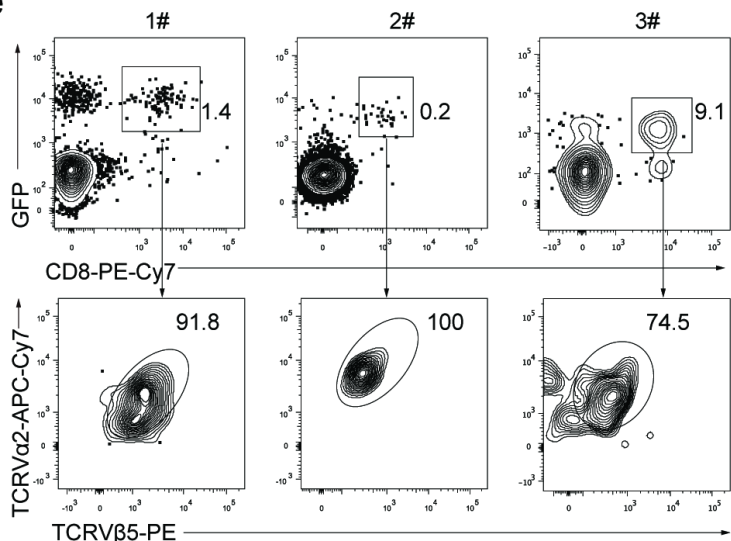

g

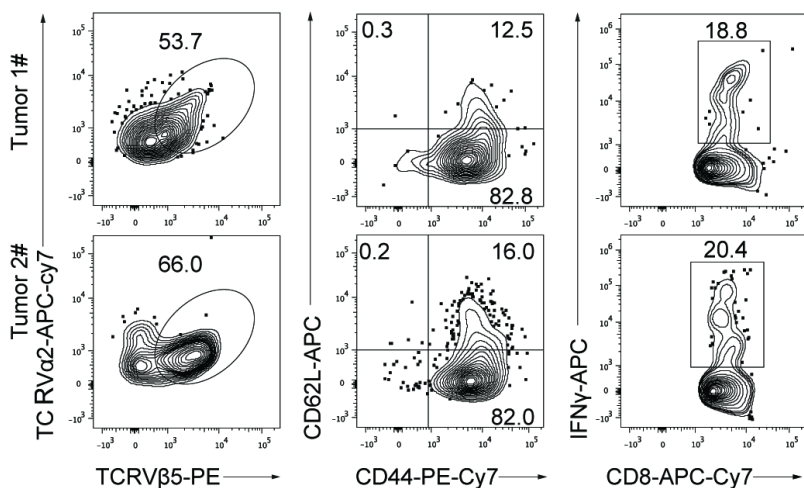

Source: https://www.biorxiv.org/content/10.1101/660977v2.full.pdf
